# Supplementary material for: Insights into the Global Transcriptome Response of Lentinula edodes Mycelia during Aging
Source: MDPI journal article supplement (doi:10.3390/jof9030379), 2023-03-20
Supplement: s1 [file s1]

---

## Supplement materials

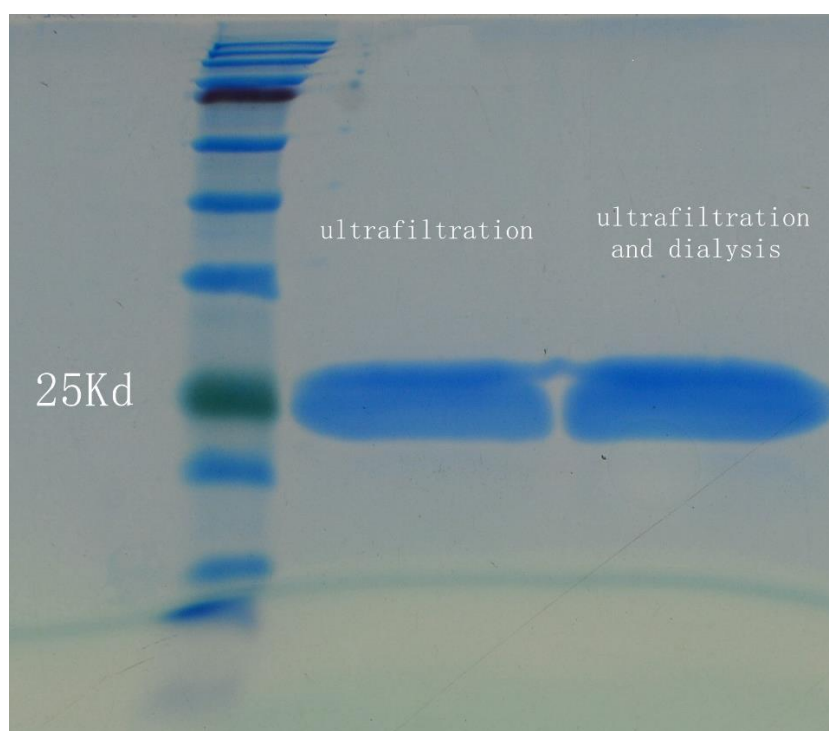

**Figure S1.** SDS-PAGE tested purified LeATG8 protein.

---

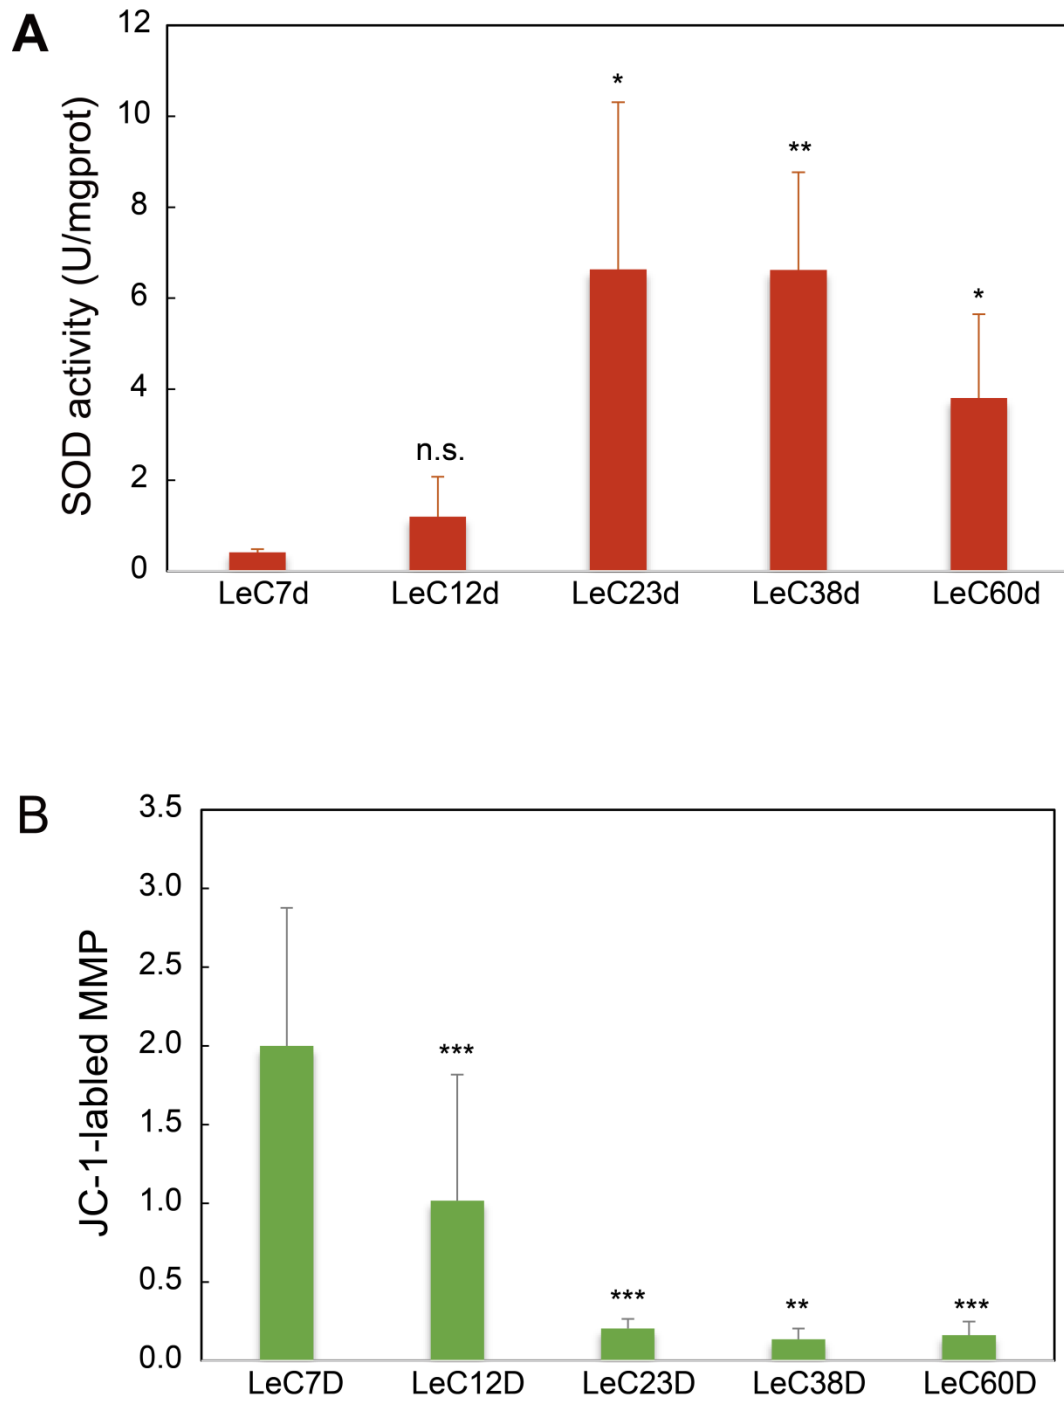

**Figure S2.** Superoxide dismutase (SOD) activity and JC-1 labeled mitochondrial membrane potential in mycelia under different times . **(A)** SOD activity of mycelia under different culture times. Mean  $\pm$  SD,  $n = 3$ . n.s., no significance, \*  $p \leq 0.05$ , \*\*  $p \leq 0.01$  (two-tailed Student's  $t$ -test). **(B)** Quantitative analysis of mitochondrial membrane potential changes based on JC-1 staining in mycelia under different times. Mean  $\pm$  SD,  $n = 100$ . n.s., no significance, \*\*  $p \leq 0.01$ , \*\*\*  $p \leq 0.001$  (two-tailed Student's  $t$ -test).

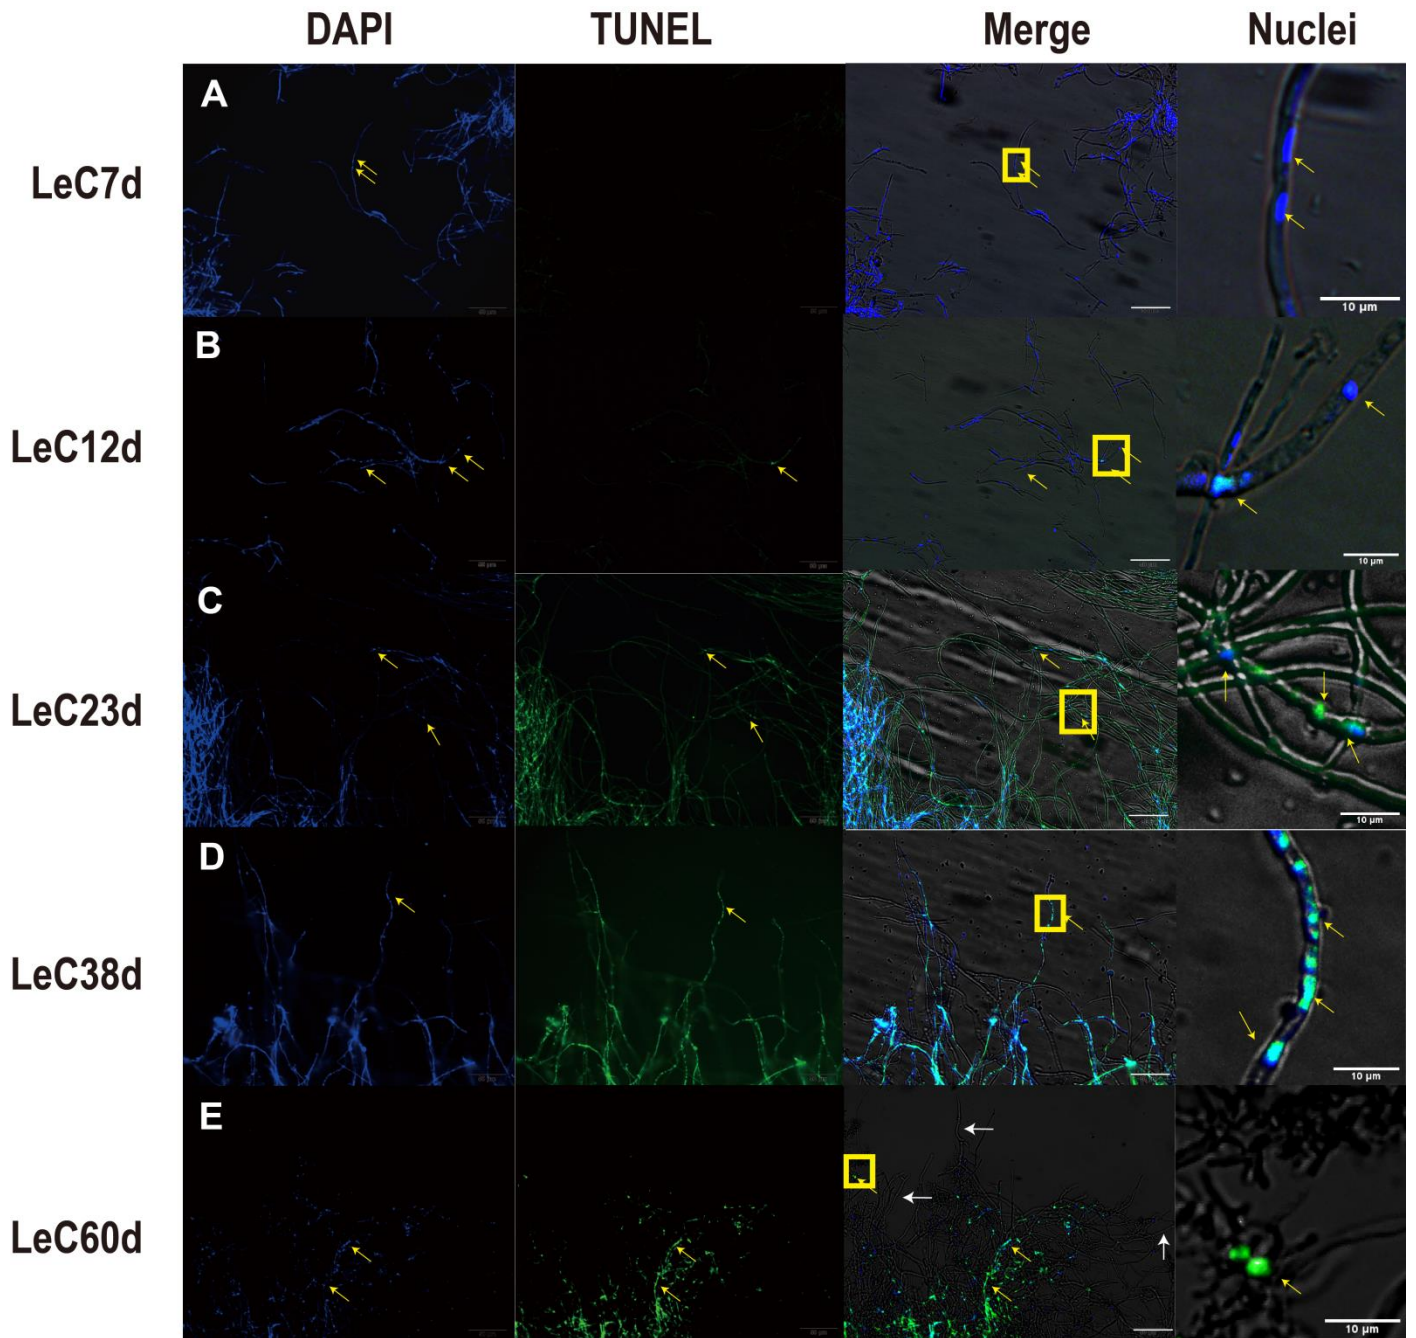

**Figure S3.** Nuclei and DNA fragments were stained via DAPI and TUNEL staining. (A) 7 days **mycelia**; (B) 12 days **mycelia**; (C) 23 days **mycelia**; (D) 38 days **mycelia**; (E) 60 days **mycelia**. Blue fluorescence indicates DAPI-labeled nuclei. Green fluorescence indicates TUNEL-labeled DNA fragments. The yellow arrow was DAPI or TUNEL labeled nuclei. The white arrow was empty cell without mitochondria. Scale bar of DAPI, TUNEL and merge was 50  $\mu\text{m}$ . Scale bar of mitochondria was 10  $\mu\text{m}$ .

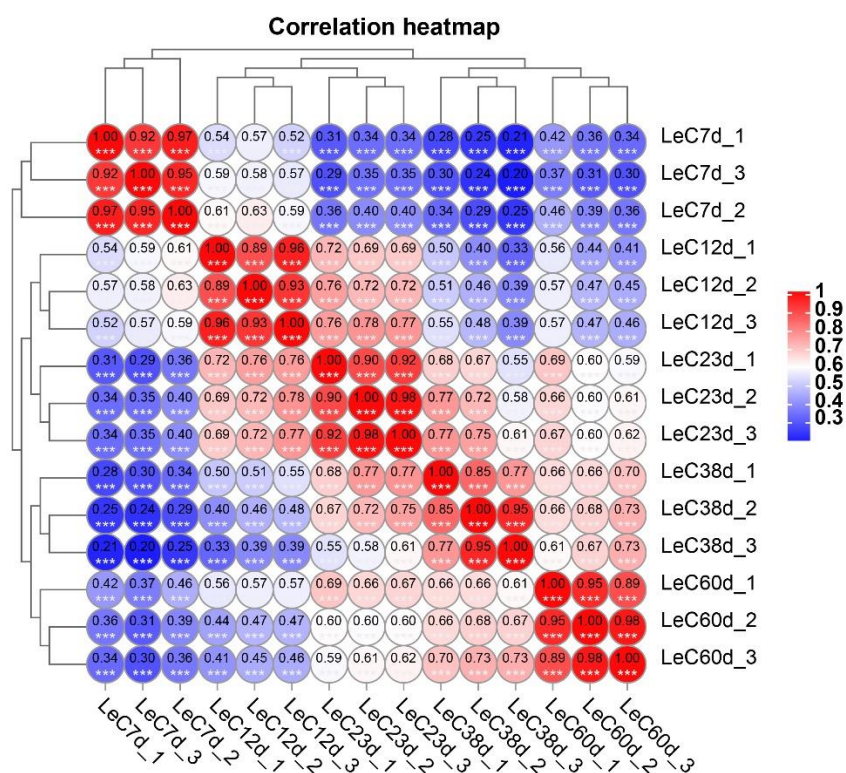

**Figure S4.** Pearson correlation value between biological replicates.

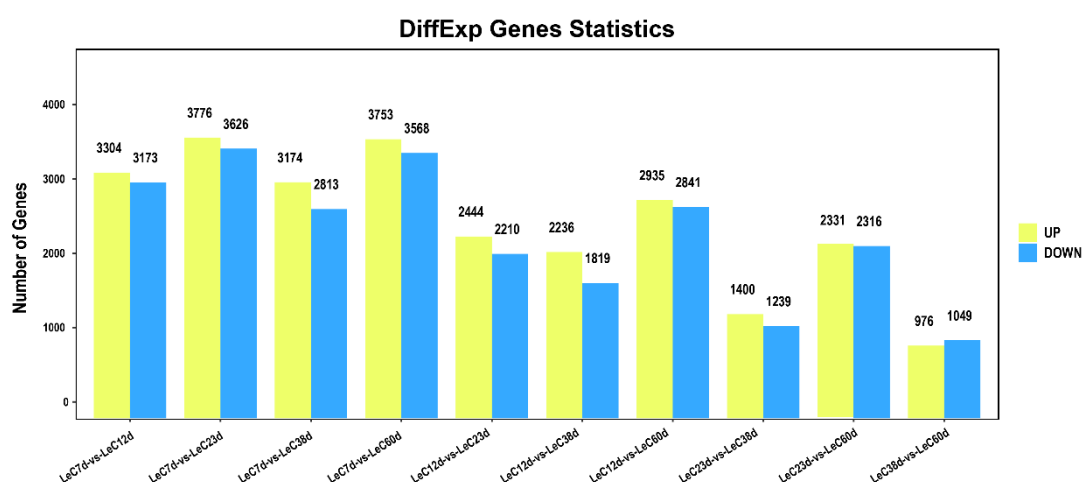

**Figure S5.** The number of DEGs among the ten categories. Yellow bars indicate upregulated genes. Blue bars indicate downregulated genes.

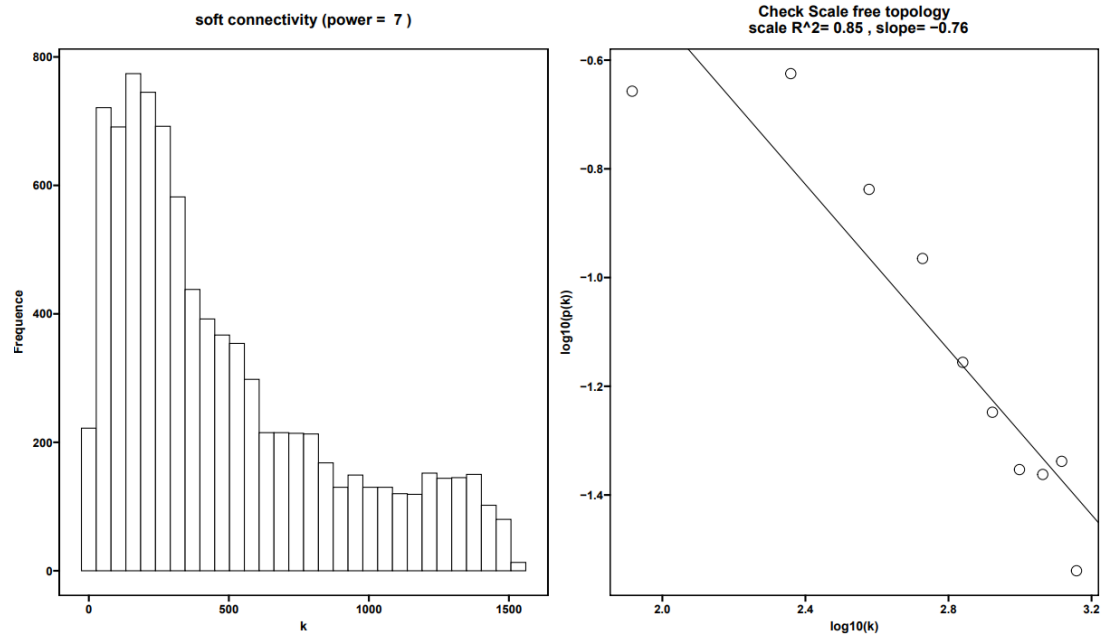

**Figure S6.** The soft connectivity and correlation coefficient when the soft threshold parameter was 7.

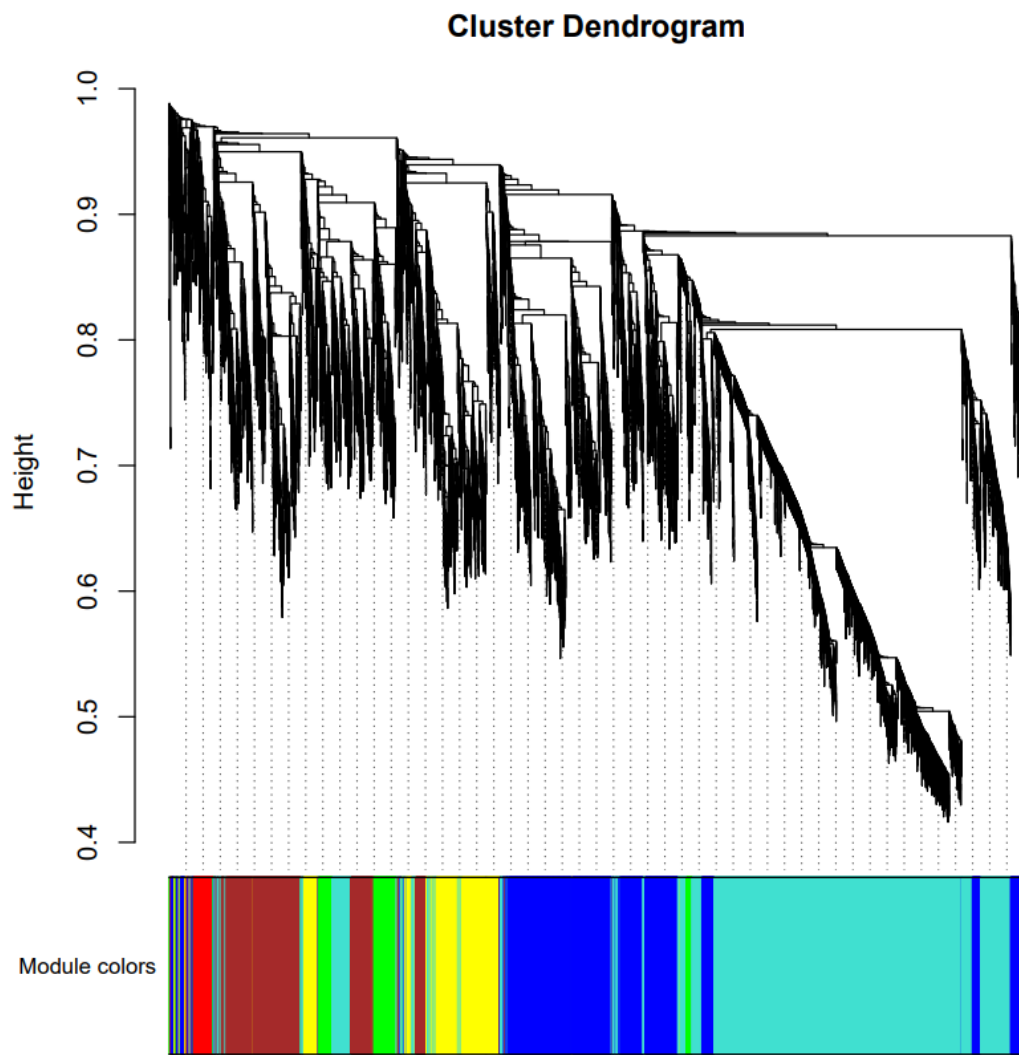

**Figure S7.** Construction of scale-free network and module classification. Dynamic tree clipping represents the initial module. The module color indicates the final module. Each branch in the hierarchical tree or each vertical line in the color bar represents a gene. Genes not attributed to any module are colored grey.

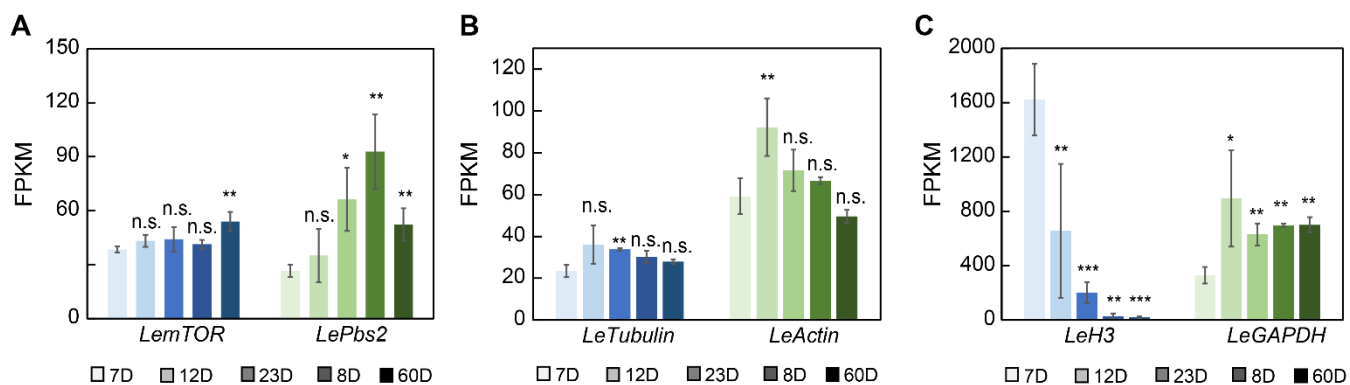

**Figure S8.** Transcription of DEGs of network hubs and housekeeping genes. (A) FPKM value of *LemTOR* and *LePbs2* gene. (B-C) FPKM value of housekeeping genes. Mean  $\pm$  SD, \*  $p \leq 0.05$ , \*\*  $p \leq 0.01$ , \*\*\*  $p \leq 0.001$  (two-tailed Student's *t*-test).

**Table S1. Data summary of RNA-seq**

| <b>sample</b> | <b>raw_reads</b> | <b>clean_reads</b> | <b>clean_bases</b> | <b>error_rate</b> | <b>Q20</b> | <b>Q30</b> | <b>GC_pct</b> |
|---------------|------------------|--------------------|--------------------|-------------------|------------|------------|---------------|
| LeC7d_1       | 43100600         | 42305864           | 6.35G              | 0.02              | 98.12      | 94.66      | 48.76         |
| LeC7d_2       | 46298694         | 45450024           | 6.82G              | 0.02              | 98.24      | 94.92      | 48.50         |
| LeC7d_3       | 45594734         | 44563200           | 6.68G              | 0.02              | 98.35      | 95.16      | 48.50         |
| LeC12d_1      | 47500690         | 46027784           | 6.90G              | 0.03              | 97.45      | 92.63      | 48.45         |
| LeC12d_2      | 42526450         | 41598776           | 6.24G              | 0.02              | 97.96      | 94.34      | 48.54         |
| LeC12d_3      | 41143786         | 40359730           | 6.05G              | 0.02              | 98.22      | 94.87      | 48.43         |
| LeC23d_1      | 42170750         | 40863368           | 6.13G              | 0.02              | 98.28      | 94.96      | 47.95         |
| LeC23d_2      | 44853426         | 43354786           | 6.50G              | 0.02              | 98.20      | 94.78      | 48.27         |
| LeC23d_3      | 45469462         | 44619024           | 6.69G              | 0.02              | 98.35      | 95.17      | 48.18         |
| LeC38d_1      | 45497880         | 44168098           | 6.63G              | 0.02              | 98.17      | 94.90      | 47.07         |
| LeC38d_2      | 43516436         | 42557148           | 6.38G              | 0.02              | 98.22      | 94.85      | 48.20         |
| LeC38d_3      | 44062466         | 43038134           | 6.46G              | 0.02              | 98.21      | 94.86      | 48.07         |
| LeC60d_1      | 44997876         | 43741834           | 6.56G              | 0.02              | 98.20      | 94.86      | 48.20         |
| LeC60d_2      | 43073420         | 41850382           | 6.28G              | 0.02              | 98.31      | 95.07      | 48.30         |
| LeC60d_3      | 45379234         | 44368320           | 6.66G              | 0.02              | 98.16      | 94.78      | 48.25         |



**Table S2. Summary of clean reads mapped to reference genome**

| <b>sample</b> | <b>total_reads</b> | <b>total_map</b> | <b>unique_map</b> | <b>multi_map</b> | <b>read1_map</b> | <b>read2_map</b> |
|---------------|--------------------|------------------|-------------------|------------------|------------------|------------------|
| LeC7d_1       | 42305864           | 39336809(92.98%) | 38764697(91.63%)  | 572112(1.35%)    | 19481358(46.05%) | 19283339(45.58%) |
| LeC7d_2       | 45450024           | 42069096(92.56%) | 41442341(91.18%)  | 626755(1.38%)    | 20797776(45.76%) | 20644565(45.42%) |
| LeC7d_3       | 44563200           | 40875358(91.72%) | 40276955(90.38%)  | 598403(1.34%)    | 20190636(45.31%) | 20086319(45.07%) |
| LeC12d_1      | 46027784           | 41580792(90.34%) | 40936654(88.94%)  | 644138(1.4%)     | 20566385(44.68%) | 20370269(44.26%) |
| LeC12d_2      | 41598776           | 37497636(90.14%) | 36922224(88.76%)  | 575412(1.38%)    | 18578473(44.66%) | 18343751(44.1%)  |
| LeC12d_3      | 40359730           | 36044971(89.31%) | 35511713(87.99%)  | 533258(1.32%)    | 17827632(44.17%) | 17684081(43.82%) |
| LeC23d_1      | 40863368           | 34541113(84.53%) | 33931480(83.04%)  | 609633(1.49%)    | 17007609(41.62%) | 16923871(41.42%) |
| LeC23d_2      | 43354786           | 37359972(86.17%) | 36658364(84.55%)  | 701608(1.62%)    | 18394370(42.43%) | 18263994(42.13%) |
| LeC23d_3      | 44619024           | 37529107(84.11%) | 36857797(82.61%)  | 671310(1.5%)     | 18483600(41.43%) | 18374197(41.18%) |
| LeC38d_1      | 44168098           | 40019671(90.61%) | 39318648(89.02%)  | 701023(1.59%)    | 19728582(44.67%) | 19590066(44.35%) |
| LeC38d_2      | 42557148           | 37257002(87.55%) | 36625401(86.06%)  | 631601(1.48%)    | 18390707(43.21%) | 18234694(42.85%) |
| LeC38d_3      | 43038134           | 37578515(87.31%) | 36976739(85.92%)  | 601776(1.4%)     | 18567082(43.14%) | 18409657(42.78%) |
| LeC60d_1      | 43741834           | 40117597(91.71%) | 39519645(90.35%)  | 597952(1.37%)    | 19843109(45.36%) | 19676536(44.98%) |
| LeC60d_2      | 41850382           | 37709599(90.11%) | 37133483(88.73%)  | 576116(1.38%)    | 18628132(44.51%) | 18505351(44.22%) |
| LeC60d_3      | 44368320           | 39546111(89.13%) | 38893048(87.66%)  | 653063(1.47%)    | 19530574(44.02%) | 19362474(43.64%) |

**Table S3. Information of soft threshold**

| Power | SFT.R.sq    | slope        | truncated.R.sq | mean.k.     | median.k.   | max.k.      |
|-------|-------------|--------------|----------------|-------------|-------------|-------------|
| 1     | 0.834937273 | 3.335990997  | 0.993161341    | 3793.659694 | 3843.199626 | 5209.611684 |
| 2     | 0.596908076 | 1.069590301  | 0.954557767    | 2191.844116 | 2146.232353 | 3748.369806 |
| 3     | 0.104515522 | 0.197404861  | 0.860548377    | 1443.717804 | 1339.149675 | 2927.755211 |
| 4     | 0.202250877 | -0.228180346 | 0.820796231    | 1026.567165 | 893.5832622 | 2396.292733 |
| 5     | 0.613666752 | -0.475817617 | 0.878623676    | 768.3076413 | 628.5514787 | 2022.823756 |
| 6     | 0.785532947 | -0.639741133 | 0.905955236    | 596.7633815 | 458.2899545 | 1745.737239 |
| 7     | 0.865957525 | -0.759546039 | 0.925698265    | 476.8410093 | 344.6636056 | 1535.289415 |
| 8     | 0.901976002 | -0.865218548 | 0.928795187    | 389.6615043 | 265.2104534 | 1375.532213 |
| 9     | 0.918155112 | -0.943001472 | 0.928713552    | 324.2857756 | 209.8163328 | 1246.13614  |
| 10    | 0.931625813 | -1.003091774 | 0.935770204    | 274.0023011 | 167.7521859 | 1139.127982 |
| 11    | 0.928338596 | -1.099574613 | 0.919328003    | 202.9093742 | 112.1279422 | 972.2115005 |
| 12    | 0.929796064 | -1.161312985 | 0.916346474    | 156.1306649 | 78.92092536 | 847.6570316 |
| 13    | 0.935685726 | -1.198516879 | 0.92011564     | 123.7354391 | 57.16707436 | 750.8229659 |
| 14    | 0.940108658 | -1.221482972 | 0.924148579    | 100.3872706 | 42.4054574  | 673.1366729 |
| 15    | 0.935342313 | -1.238945525 | 0.918275963    | 83.01118081 | 32.36848186 | 609.2553385 |
| 16    | 0.927470296 | -1.251055789 | 0.90823573     | 69.73456854 | 24.83095428 | 555.6786663 |
| 17    | 0.928760535 | -1.256413162 | 0.909921805    | 59.36455067 | 19.34245861 | 510.0174035 |
| 18    | 0.917191458 | -1.267426902 | 0.895927723    | 51.11224892 | 15.2389853  | 470.5835451 |
| 19    | 0.918918138 | -1.270274685 | 0.898088365    | 44.43917561 | 12.24639298 | 436.1490365 |
| 20    | 0.919447482 | -1.266986415 | 0.899543762    | 38.96764017 | 9.963129192 | 405.7976169 |

**Table S4. The number genes in co-expressed modules**

| Module    | Gene numbers |
|-----------|--------------|
| Blue      | 2187         |
| Brown     | 1262         |
| Green     | 459          |
| Grey      | 7            |
| Red       | 206          |
| Turquoise | 3790         |
| Yellow    | 945          |

**Table S5 Blue module DEGS list filtered by Upset Venn diagram**

| gene              | LeC7d_vs_LeC38d_log2FoldChange | LeC7d_vs_LeC38d_pvalue | LeC7d_vs_LeC38d_padj |
|-------------------|--------------------------------|------------------------|----------------------|
| gene-Led00960-sp3 | 1.147903181                    | 0.012274386            | 0.024046703          |
| gene-Led11025-sp3 | 1.027400303                    | 0.01013666             | 0.020210517          |
| gene-Led04387-sp3 | 0.972967846                    | 3.26E-06               | 1.14E-05             |
| gene-Led01639-sp3 | 2.637166358                    | 2.57E-15               | 2.16E-14             |
| gene-Led01833-sp3 | 0.646623906                    | 0.000341863            | 0.000902117          |
| gene-Led09931-sp3 | 1.455674038                    | 9.50E-19               | 1.04E-17             |
| gene-Led11178-sp3 | 5.348116708                    | 7.89E-30               | 1.56E-28             |
| gene-Led04493-sp3 | 4.909406522                    | 5.30E-63               | 3.68E-61             |
| gene-Led07964-sp3 | 1.845904535                    | 5.47E-21               | 6.80E-20             |
| gene-Led09395-sp3 | 1.052533699                    | 0.000136879            | 0.000384026          |
| gene-Led09417-sp3 | 2.666624175                    | 5.39E-14               | 4.06E-13             |
| gene-Led01921-sp3 | 5.318933528                    | 2.97E-37               | 8.22E-36             |
| gene-Led04002-sp3 | 4.39064993                     | 4.60E-59               | 2.91E-57             |
| gene-Led04826-sp3 | 5.175461743                    | 3.75E-25               | 5.66E-24             |
| gene-Led10019-sp3 | -1.391173447                   | 4.58E-13               | 3.17E-12             |
| gene-Led07671-sp3 | 1.76803083                     | 1.23E-05               | 3.97E-05             |
| gene-Led03469-sp3 | 3.230568583                    | 1.30E-32               | 2.86E-31             |
| gene-Led00029-sp3 | 2.945404061                    | 1.50E-17               | 1.50E-16             |
| gene-Led03768-sp3 | 1.845398699                    | 2.06E-13               | 1.48E-12             |
| gene-Led07617-sp3 | 1.302181572                    | 2.29E-10               | 1.27E-09             |
| gene-Led07043-sp3 | 5.468008309                    | 3.43E-207              | 4.93E-204            |
| gene-Led07148-sp3 | 3.056977703                    | 2.22E-06               | 7.96E-06             |
| gene-Led10551-sp3 | 5.514636001                    | 3.09E-22               | 4.10E-21             |
| gene-Led06780-sp3 | 2.532688071                    | 5.02E-08               | 2.20E-07             |
| gene-Led04164-sp3 | -2.782825658                   | 1.24E-17               | 1.25E-16             |
| gene-Led03800-sp3 | 1.819718431                    | 1.96E-15               | 1.66E-14             |
| gene-Led06091-sp3 | 1.610649648                    | 9.55E-26               | 1.49E-24             |
| gene-Led09649-sp3 | 1.425987839                    | 9.40E-06               | 3.09E-05             |
| gene-Led01824-sp3 | 2.505512228                    | 9.50E-33               | 2.10E-31             |
| gene-Led00214-sp3 | 3.629911473                    | 8.83E-49               | 3.70E-47             |
| gene-Led02706-sp3 | 2.388151456                    | 1.94E-13               | 1.40E-12             |
| gene-Led05844-sp3 | 2.947137976                    | 8.59E-21               | 1.05E-19             |
| gene-Led00086-sp3 | 5.302735618                    | 2.17E-56               | 1.23E-54             |
| gene-Led05744-sp3 | 5.516828605                    | 1.08E-71               | 1.03E-69             |
| gene-Led05902-sp3 | 4.223577581                    | 4.99E-60               | 3.17E-58             |
| gene-Led06278-sp3 | -1.999814108                   | 5.70E-13               | 3.91E-12             |
| gene-Led02898-sp3 | 3.475867122                    | 2.61E-33               | 5.91E-32             |
| gene-Led02681-sp3 | 3.1941396                      | 4.94E-43               | 1.68E-41             |
| gene-Led03563-sp3 | 1.360231589                    | 0.007320824            | 0.015024046          |

---

|                   |              |             |             |
|-------------------|--------------|-------------|-------------|
| gene-Led02610-sp3 | 0.352890748  | 0.014444466 | 0.027874604 |
| gene-Led06196-sp3 | 3.87143099   | 2.11E-35    | 5.35E-34    |
| gene-Led05879-sp3 | 1.471094147  | 1.24E-08    | 5.79E-08    |
| gene-Led03554-sp3 | 1.823910244  | 8.34E-13    | 5.65E-12    |
| gene-Led01364-sp3 | 2.767083698  | 4.34E-18    | 4.53E-17    |
| gene-Led06805-sp3 | 1.277940525  | 0.009213297 | 0.018522851 |
| gene-Led00709-sp3 | -1.159782148 | 9.91E-08    | 4.20E-07    |
| gene-Led03965-sp3 | 7.386620136  | 6.52E-45    | 2.38E-43    |
| gene-Led03331-sp3 | 4.30914698   | 4.57E-41    | 1.45E-39    |
| gene-Led06357-sp3 | 2.728329347  | 5.63E-26    | 8.86E-25    |
| gene-Led05327-sp3 | 5.530774442  | 1.50E-45    | 5.57E-44    |
| gene-Led09374-sp3 | 8.407407935  | 1.63E-34    | 3.99E-33    |
| gene-Led06463-sp3 | -1.616685728 | 0.000378673 | 0.000989528 |
| gene-Led05104-sp3 | 2.135283824  | 3.54E-16    | 3.21E-15    |
| gene-Led00661-sp3 | -1.575432221 | 3.02E-42    | 1.01E-40    |
| gene-Led00884-sp3 | 1.184586807  | 3.66E-16    | 3.31E-15    |
| gene-Led07263-sp3 | 1.558170311  | 0.015312367 | 0.029369144 |
| gene-Led05210-sp3 | 3.935912954  | 1.89E-23    | 2.65E-22    |
| gene-Led07309-sp3 | 2.775847553  | 2.41E-40    | 7.50E-39    |
| gene-Led02929-sp3 | 1.899999507  | 1.23E-12    | 8.21E-12    |
| gene-Led10082-sp3 | -1.118231585 | 7.25E-11    | 4.18E-10    |
| gene-Led01806-sp3 | 2.775313633  | 2.37E-58    | 1.44E-56    |
| gene-Led05708-sp3 | 1.325980148  | 1.39E-16    | 1.29E-15    |
| gene-Led08679-sp3 | 0.57938621   | 9.26E-06    | 3.05E-05    |
| gene-Led08306-sp3 | 0.911017305  | 2.00E-07    | 8.19E-07    |
| gene-Led01271-sp3 | 1.65005636   | 1.98E-07    | 8.11E-07    |
| gene-Led07193-sp3 | 5.056528718  | 2.45E-71    | 2.33E-69    |
| gene-Led05336-sp3 | 0.892335013  | 4.07E-05    | 0.000122176 |
| gene-Led08477-sp3 | 2.434891584  | 2.64E-29    | 5.01E-28    |
| gene-Led07999-sp3 | -1.119713068 | 0.008578793 | 0.017378751 |
| gene-Led08562-sp3 | 1.866068027  | 2.33E-07    | 9.43E-07    |
| gene-Led03548-sp3 | 2.777445656  | 2.73E-15    | 2.28E-14    |
| gene-Led06489-sp3 | 1.853270102  | 2.21E-05    | 6.85E-05    |
| gene-Led02627-sp3 | 1.111502085  | 5.01E-08    | 2.19E-07    |
| gene-Led09414-sp3 | 1.380149211  | 0.000820205 | 0.002021472 |
| gene-Led02712-sp3 | 1.247708268  | 1.64E-05    | 5.20E-05    |
| gene-Led07726-sp3 | 1.112641246  | 4.27E-06    | 1.47E-05    |
| gene-Led04786-sp3 | 1.493947239  | 0.002406727 | 0.00544402  |
| gene-Led06016-sp3 | 1.982922216  | 2.21E-23    | 3.08E-22    |
| gene-Led06101-sp3 | 4.429674727  | 7.52E-18    | 7.70E-17    |
| gene-Led09614-sp3 | 3.412063082  | 1.58E-34    | 3.87E-33    |
| gene-Led03853-sp3 | 2.88993946   | 2.32E-11    | 1.40E-10    |

---

|                   |             |             |             |
|-------------------|-------------|-------------|-------------|
| gene-Led01350-sp3 | 2.467134377 | 3.64E-19    | 4.09E-18    |
| gene-Led00114-sp3 | 1.289878126 | 9.94E-06    | 3.26E-05    |
| gene-Led09148-sp3 | 2.185356184 | 6.35E-11    | 3.68E-10    |
| gene-Led10885-sp3 | 1.059109461 | 4.16E-08    | 1.84E-07    |
| gene-Led06110-sp3 | 3.754397173 | 1.71E-27    | 2.93E-26    |
| gene-Led05858-sp3 | 2.623773383 | 2.49E-11    | 1.50E-10    |
| gene-Led09840-sp3 | 4.361110249 | 1.29E-29    | 2.52E-28    |
| gene-Led03700-sp3 | 0.826113871 | 0.006509339 | 0.013513092 |
| gene-Led10545-sp3 | 8.118814647 | 9.12E-50    | 4.01E-48    |
| gene-Led05448-sp3 | 2.004841734 | 3.19E-06    | 1.12E-05    |
| gene-Led04296-sp3 | 1.293938083 | 0.012729628 | 0.024861087 |
| gene-Led06907-sp3 | 2.719330524 | 1.89E-22    | 2.53E-21    |
| gene-Led02241-sp3 | 6.8061941   | 1.33E-32    | 2.93E-31    |
| gene-Led04404-sp3 | 2.035758691 | 4.43E-15    | 3.64E-14    |
| gene-Led10905-sp3 | 2.871384499 | 2.29E-13    | 1.63E-12    |
| gene-Led08617-sp3 | 1.549183407 | 1.13E-09    | 5.84E-09    |
| gene-Led02457-sp3 | 3.844519108 | 4.25E-56    | 2.39E-54    |
| gene-Led11360-sp3 | 2.056098967 | 5.75E-06    | 1.95E-05    |
| gene-Led09869-sp3 | 0.541768396 | 1.90E-06    | 6.83E-06    |
| gene-Led08115-sp3 | 1.101533807 | 1.72E-10    | 9.61E-10    |
| gene-Led02291-sp3 | 4.713508704 | 7.78E-21    | 9.56E-20    |
| gene-Led05829-sp3 | 1.76810999  | 2.72E-11    | 1.63E-10    |
| gene-Led05403-sp3 | 1.431372146 | 5.85E-12    | 3.73E-11    |
| gene-Led06421-sp3 | 2.066707013 | 2.59E-13    | 1.84E-12    |
| gene-Led06290-sp3 | 3.448678662 | 1.12E-10    | 6.33E-10    |
| gene-Led01739-sp3 | 5.096111613 | 1.58E-17    | 1.58E-16    |
| gene-Led04706-sp3 | 7.508528659 | 2.27E-24    | 3.34E-23    |
| gene-Led05457-sp3 | -0.67730427 | 0.010585073 | 0.02100309  |
| gene-Led02518-sp3 | 4.459174048 | 3.27E-33    | 7.39E-32    |
| gene-Led03141-sp3 | 2.596237153 | 3.22E-15    | 2.68E-14    |
| gene-Led08151-sp3 | 1.455065435 | 6.08E-12    | 3.87E-11    |
| gene-Led09177-sp3 | 5.93196834  | 9.76E-20    | 1.13E-18    |
| gene-Led03815-sp3 | 1.248850735 | 0.002973194 | 0.006610165 |
| gene-Led00974-sp3 | 3.513668247 | 9.86E-29    | 1.80E-27    |
| gene-Led03657-sp3 | 2.835283588 | 2.05E-14    | 1.59E-13    |
| gene-Led07719-sp3 | 2.044276485 | 3.71E-14    | 2.81E-13    |
| gene-Led04609-sp3 | 1.422619844 | 5.34E-09    | 2.58E-08    |
| gene-Led09508-sp3 | 4.563109222 | 4.67E-53    | 2.29E-51    |
| gene-Led03355-sp3 | 1.244241912 | 0.014231762 | 0.027516928 |
| gene-Led00416-sp3 | 1.297685621 | 1.06E-05    | 3.44E-05    |
| gene-Led07976-sp3 | 2.131262748 | 3.75E-61    | 2.46E-59    |
| gene-Led09284-sp3 | 1.839145918 | 1.80E-15    | 1.53E-14    |

---

|                   |              |             |             |
|-------------------|--------------|-------------|-------------|
| gene-Led11386-sp3 | 3.399418099  | 1.14E-10    | 6.42E-10    |
| gene-Led05101-sp3 | 0.897440521  | 3.63E-06    | 1.26E-05    |
| gene-Led08565-sp3 | 0.991143537  | 9.61E-06    | 3.16E-05    |
| gene-Led01865-sp3 | 5.010335532  | 3.80E-49    | 1.62E-47    |
| gene-Led06269-sp3 | 2.742140929  | 7.20E-11    | 4.16E-10    |
| gene-Led02165-sp3 | 1.500232828  | 0.000473706 | 0.001220113 |
| gene-Led10829-sp3 | 2.162653698  | 5.07E-08    | 2.22E-07    |
| gene-Led06697-sp3 | 3.002476273  | 1.87E-15    | 1.59E-14    |
| gene-Led08574-sp3 | 1.571317689  | 8.22E-17    | 7.78E-16    |
| gene-Led02845-sp3 | 4.488352845  | 1.83E-39    | 5.55E-38    |
| gene-Led04381-sp3 | 1.311365358  | 1.37E-08    | 6.41E-08    |
| gene-Led02299-sp3 | 1.965790119  | 4.87E-05    | 0.000145086 |
| gene-Led06856-sp3 | 3.515864489  | 1.33E-60    | 8.55E-59    |
| gene-Led05333-sp3 | 3.94385171   | 4.11E-63    | 2.89E-61    |
| gene-Led07521-sp3 | 1.917531476  | 0.004271571 | 0.009174347 |
| gene-Led06847-sp3 | -2.227251582 | 2.05E-08    | 9.38E-08    |
| gene-Led05965-sp3 | 2.304323885  | 9.89E-22    | 1.28E-20    |
| gene-Led02800-sp3 | 0.8769316    | 0.008548585 | 0.017324534 |
| gene-Led11052-sp3 | 2.141386819  | 2.19E-10    | 1.21E-09    |
| gene-Led00038-sp3 | 5.85323886   | 5.29E-25    | 7.93E-24    |
| gene-Led00149-sp3 | 1.106239168  | 5.68E-08    | 2.47E-07    |
| gene-Led02524-sp3 | 0.804059562  | 0.001861337 | 0.004292898 |
| gene-Led01516-sp3 | 1.944474274  | 1.03E-16    | 9.75E-16    |
| gene-Led06888-sp3 | 4.701320187  | 5.32E-13    | 3.66E-12    |
| gene-Led02756-sp3 | 1.056670514  | 4.40E-05    | 0.000131665 |
| gene-Led03908-sp3 | 9.080991131  | 1.19E-101   | 2.25E-99    |
| gene-Led02067-sp3 | 0.938690967  | 7.82E-06    | 2.60E-05    |
| gene-Led04055-sp3 | 4.34668902   | 2.56E-19    | 2.92E-18    |
| gene-Led05193-sp3 | 1.405871084  | 5.41E-05    | 0.000160182 |
| gene-Led09843-sp3 | 2.124670303  | 3.19E-11    | 1.90E-10    |
| gene-Led04814-sp3 | 6.109918572  | 1.14E-53    | 5.80E-52    |
| gene-Led05422-sp3 | 1.956384726  | 1.14E-21    | 1.47E-20    |
| gene-Led03434-sp3 | 8.241255806  | 7.81E-56    | 4.34E-54    |
| gene-Led01020-sp3 | 3.83454974   | 5.71E-61    | 3.70E-59    |
| gene-Led08436-sp3 | -1.041959857 | 1.21E-22    | 1.63E-21    |
| gene-Led03683-sp3 | 2.159123679  | 1.77E-15    | 1.51E-14    |
| gene-Led02769-sp3 | 1.284650925  | 1.35E-06    | 4.94E-06    |
| gene-Led01664-sp3 | 1.179931213  | 1.41E-12    | 9.39E-12    |
| gene-Led01229-sp3 | 5.883619397  | 3.54E-28    | 6.31E-27    |
| gene-Led11212-sp3 | 3.18507808   | 2.60E-15    | 2.18E-14    |
| gene-Led05632-sp3 | 3.810489388  | 6.47E-32    | 1.38E-30    |
| gene-Led05720-sp3 | 1.650113271  | 4.43E-15    | 3.64E-14    |

---

|                   |              |             |             |
|-------------------|--------------|-------------|-------------|
| gene-Led07813-sp3 | 3.511017098  | 1.31E-52    | 6.27E-51    |
| gene-Led08107-sp3 | 1.550132414  | 9.26E-07    | 3.46E-06    |
| gene-Led06084-sp3 | 7.97672387   | 9.18E-29    | 1.69E-27    |
| gene-Led05456-sp3 | 0.638129969  | 0.004905281 | 0.010402132 |
| gene-Led03622-sp3 | 5.201528562  | 5.01E-30    | 9.94E-29    |
| gene-Led04680-sp3 | 2.372282359  | 1.72E-10    | 9.61E-10    |
| gene-Led06728-sp3 | 5.153370931  | 1.66E-51    | 7.58E-50    |
| gene-Led07090-sp3 | 3.644271439  | 2.43E-68    | 2.03E-66    |
| gene-Led08186-sp3 | 2.632813395  | 4.47E-21    | 5.61E-20    |
| gene-Led06361-sp3 | 0.879147354  | 4.77E-07    | 1.85E-06    |
| gene-Led07558-sp3 | 1.336165002  | 4.96E-06    | 1.70E-05    |
| gene-Led00777-sp3 | 1.508652465  | 2.08E-07    | 8.50E-07    |
| gene-Led08839-sp3 | 1.174679455  | 3.64E-10    | 1.98E-09    |
| gene-Led10035-sp3 | 1.335355796  | 2.94E-08    | 1.33E-07    |
| gene-Led00901-sp3 | 2.619219132  | 8.60E-29    | 1.59E-27    |
| gene-Led04061-sp3 | 3.409058237  | 2.20E-16    | 2.02E-15    |
| gene-Led09805-sp3 | 1.159118135  | 1.55E-09    | 7.89E-09    |
| gene-Led05184-sp3 | 1.853986882  | 6.00E-08    | 2.60E-07    |
| gene-Led06453-sp3 | 1.983661143  | 6.28E-10    | 3.31E-09    |
| gene-Led05860-sp3 | 2.40946299   | 7.24E-12    | 4.58E-11    |
| gene-Led09305-sp3 | 1.525435092  | 2.87E-11    | 1.73E-10    |
| gene-Led05531-sp3 | 1.09721546   | 0.000108384 | 0.000308818 |
| gene-Led01612-sp3 | 1.12044252   | 8.48E-06    | 2.80E-05    |
| gene-Led09104-sp3 | 0.823633181  | 6.33E-07    | 2.42E-06    |
| gene-Led08152-sp3 | 3.275592002  | 8.49E-36    | 2.21E-34    |
| gene-Led07502-sp3 | -1.117196819 | 0.023198156 | 0.042562396 |
| gene-Led05886-sp3 | 6.00432371   | 1.07E-22    | 1.44E-21    |
| gene-Led09665-sp3 | 0.992098505  | 3.82E-07    | 1.50E-06    |
| gene-Led08168-sp3 | 3.555726044  | 1.70E-29    | 3.27E-28    |
| gene-Led09363-sp3 | 3.17749374   | 1.79E-64    | 1.31E-62    |
| gene-Led07975-sp3 | 1.02770778   | 1.22E-17    | 1.23E-16    |
| gene-Led00716-sp3 | 1.445493158  | 3.82E-11    | 2.26E-10    |
| gene-Led06023-sp3 | 1.86619314   | 0.008755606 | 0.017715528 |
| gene-Led01439-sp3 | 1.773357534  | 0.000170794 | 0.000473759 |
| gene-Led00216-sp3 | 4.162672903  | 1.18E-82    | 1.44E-80    |
| gene-Led10636-sp3 | 2.774227865  | 6.00E-36    | 1.59E-34    |
| gene-Led09591-sp3 | 1.091225246  | 9.41E-11    | 5.37E-10    |
| gene-Led06093-sp3 | 1.160316953  | 0.022638621 | 0.041626919 |
| gene-Led06953-sp3 | 1.510802341  | 2.28E-20    | 2.72E-19    |
| gene-Led01713-sp3 | 1.067992235  | 1.43E-08    | 6.65E-08    |
| gene-Led06553-sp3 | 1.129886773  | 0.000553232 | 0.00140693  |
| gene-Led09381-sp3 | 2.098247934  | 5.17E-11    | 3.02E-10    |

---

|                   |              |             |             |
|-------------------|--------------|-------------|-------------|
| gene-Led04437-sp3 | 2.314398566  | 9.27E-13    | 6.25E-12    |
| gene-Led05557-sp3 | 1.463676581  | 0.001339558 | 0.003171796 |
| gene-Led00743-sp3 | 0.703661056  | 1.54E-06    | 5.60E-06    |
| gene-Led03876-sp3 | 3.748194073  | 1.95E-79    | 2.25E-77    |
| gene-Led08341-sp3 | 3.337580632  | 4.23E-35    | 1.06E-33    |
| gene-Led07200-sp3 | 2.345524917  | 6.13E-23    | 8.38E-22    |
| gene-Led09231-sp3 | 0.779738881  | 1.07E-05    | 3.47E-05    |
| gene-Led10606-sp3 | 4.036472943  | 2.41E-26    | 3.91E-25    |
| gene-Led09055-sp3 | 2.156151258  | 5.72E-11    | 3.33E-10    |
| gene-Led08479-sp3 | 6.070309634  | 3.53E-70    | 3.15E-68    |
| gene-Led10115-sp3 | 2.623908148  | 1.48E-06    | 5.39E-06    |
| gene-Led08708-sp3 | 0.92317954   | 2.46E-09    | 1.23E-08    |
| gene-Led05868-sp3 | 0.904479363  | 3.26E-05    | 9.94E-05    |
| gene-Led05794-sp3 | 0.683918422  | 0.022219287 | 0.040930694 |
| gene-Led00020-sp3 | 4.608176357  | 1.06E-14    | 8.41E-14    |
| gene-Led03533-sp3 | 0.943357698  | 0.024437269 | 0.044562172 |
| gene-Led00035-sp3 | 1.743664943  | 0.012447849 | 0.024358068 |
| gene-Led02410-sp3 | 3.65753923   | 3.81E-40    | 1.18E-38    |
| gene-Led04013-sp3 | 1.819050313  | 4.30E-06    | 1.48E-05    |
| gene-Led05264-sp3 | 1.066799538  | 0.005354525 | 0.01128343  |
| gene-Led06272-sp3 | 1.52192135   | 1.28E-31    | 2.70E-30    |
| gene-Led01932-sp3 | 3.730809542  | 2.15E-56    | 1.23E-54    |
| gene-Led00322-sp3 | 3.825614614  | 8.80E-25    | 1.31E-23    |
| gene-Led08847-sp3 | 0.824148674  | 0.00505511  | 0.010704063 |
| gene-Led00204-sp3 | 5.141981221  | 3.43E-27    | 5.80E-26    |
| gene-Led05462-sp3 | 1.961322264  | 0.001304601 | 0.003095465 |
| gene-Led07733-sp3 | 1.99357277   | 9.10E-09    | 4.32E-08    |
| gene-Led09752-sp3 | 1.198319171  | 1.92E-05    | 6.02E-05    |
| gene-Led00283-sp3 | 1.225900921  | 2.32E-08    | 1.06E-07    |
| gene-Led06506-sp3 | 4.208964482  | 1.54E-29    | 2.98E-28    |
| gene-Led04048-sp3 | 1.570961013  | 0.003904179 | 0.008439335 |
| gene-Led11249-sp3 | 1.018547295  | 0.007459235 | 0.015283151 |
| gene-Led03130-sp3 | -1.284585421 | 2.87E-07    | 1.15E-06    |
| gene-Led07920-sp3 | 1.260254591  | 0.002857935 | 0.006379296 |
| gene-Led07170-sp3 | 5.615172133  | 1.62E-49    | 7.02E-48    |
| gene-Led05131-sp3 | 1.785362847  | 1.10E-07    | 4.64E-07    |
| gene-Led02284-sp3 | 0.762665278  | 0.022383407 | 0.041202838 |
| gene-Led07386-sp3 | 1.335732154  | 0.001568981 | 0.003669955 |
| gene-Led06112-sp3 | 2.335294762  | 1.35E-27    | 2.32E-26    |
| gene-Led01048-sp3 | 1.415090044  | 1.33E-14    | 1.04E-13    |
| gene-Led10547-sp3 | 6.163487926  | 1.29E-35    | 3.32E-34    |
| gene-Led06227-sp3 | 4.525112997  | 5.58E-42    | 1.83E-40    |



---

|                   |             |             |             |
|-------------------|-------------|-------------|-------------|
| gene-Led07019-sp3 | 1.686558881 | 3.86E-11    | 2.28E-10    |
| gene-Led00618-sp3 | 2.623726041 | 1.37E-28    | 2.48E-27    |
| gene-Led06378-sp3 | 5.511523939 | 1.27E-21    | 1.64E-20    |
| gene-Led00384-sp3 | 0.951429971 | 0.022546869 | 0.041473374 |
| gene-Led01007-sp3 | 4.139908542 | 1.25E-66    | 9.90E-65    |
| gene-Led00805-sp3 | 2.11018569  | 5.44E-66    | 4.12E-64    |
| gene-Led04834-sp3 | 2.823840273 | 1.38E-07    | 5.78E-07    |
| gene-Led08480-sp3 | 4.020956129 | 1.27E-11    | 7.90E-11    |
| gene-Led10363-sp3 | 7.601879795 | 1.16E-35    | 3.01E-34    |
| gene-Led00571-sp3 | 3.918382315 | 4.77E-24    | 6.85E-23    |
| gene-Led03096-sp3 | 4.567987043 | 1.52E-50    | 6.76E-49    |
| gene-Led09491-sp3 | 1.400734853 | 3.02E-08    | 1.36E-07    |
| gene-Led08554-sp3 | 2.046029908 | 6.33E-15    | 5.14E-14    |
| gene-Led06109-sp3 | 2.952077813 | 1.68E-15    | 1.45E-14    |
| gene-Led00242-sp3 | 1.172359491 | 2.70E-05    | 8.31E-05    |
| gene-Led01854-sp3 | 2.426639009 | 5.28E-06    | 1.80E-05    |
| gene-Led09607-sp3 | 3.606722858 | 1.94E-23    | 2.71E-22    |
| gene-Led06651-sp3 | 2.440623139 | 4.19E-13    | 2.90E-12    |
| gene-Led09378-sp3 | 5.085128347 | 2.27E-100   | 4.07E-98    |
| gene-Led01294-sp3 | 3.954473575 | 4.55E-96    | 7.62E-94    |
| gene-Led00049-sp3 | 5.314772926 | 1.44E-19    | 1.66E-18    |
| gene-Led01970-sp3 | 4.375994568 | 4.39E-18    | 4.57E-17    |
| gene-Led09035-sp3 | 3.806639845 | 7.69E-37    | 2.11E-35    |
| gene-Led03636-sp3 | 2.532073736 | 5.22E-26    | 8.25E-25    |
| gene-Led10023-sp3 | 3.575874867 | 1.15E-40    | 3.62E-39    |
| gene-Led03153-sp3 | 0.961986634 | 0.006221351 | 0.01298762  |
| gene-Led04212-sp3 | 2.50855247  | 0.004541742 | 0.009688407 |
| gene-Led06099-sp3 | 3.981387122 | 9.14E-27    | 1.52E-25    |
| gene-Led01196-sp3 | 5.884845968 | 1.27E-84    | 1.66E-82    |
| gene-Led03547-sp3 | 1.621972368 | 3.30E-19    | 3.72E-18    |
| gene-Led00055-sp3 | 6.138926223 | 8.13E-25    | 1.21E-23    |
| gene-Led06784-sp3 | 0.981977352 | 1.05E-21    | 1.36E-20    |
| gene-Led09867-sp3 | 1.345511274 | 1.53E-07    | 6.36E-07    |
| gene-Led01570-sp3 | 2.905540465 | 1.11E-45    | 4.13E-44    |
| gene-Led03651-sp3 | 5.813944674 | 4.86E-80    | 5.75E-78    |
| gene-Led01463-sp3 | 1.063210849 | 0.001344426 | 0.003182452 |
| gene-Led10103-sp3 | 2.794164837 | 4.27E-11    | 2.52E-10    |
| gene-Led05326-sp3 | 0.462516595 | 0.01080146  | 0.0213742   |
| gene-Led09458-sp3 | 1.251217054 | 0.011441789 | 0.022529661 |
| gene-Led04603-sp3 | 2.284530559 | 0.003463565 | 0.00759628  |
| gene-Led07253-sp3 | 1.0522165   | 7.08E-05    | 0.000206679 |
| gene-Led02341-sp3 | 2.18925838  | 8.54E-18    | 8.70E-17    |

---

|                   |              |             |             |
|-------------------|--------------|-------------|-------------|
| gene-Led10283-sp3 | 4.0102561    | 2.03E-25    | 3.10E-24    |
| gene-Led06041-sp3 | 1.75994929   | 0.00225806  | 0.0051372   |
| gene-Led01472-sp3 | 2.314941188  | 1.94E-23    | 2.71E-22    |
| gene-Led01146-sp3 | -0.998282421 | 0.014895895 | 0.028630406 |
| gene-Led10185-sp3 | 6.695014814  | 3.08E-106   | 6.59E-104   |
| gene-Led07898-sp3 | 2.472290744  | 7.12E-30    | 1.41E-28    |
| gene-Led06571-sp3 | 1.159745054  | 0.001276739 | 0.003032933 |
| gene-Led08148-sp3 | 3.019433653  | 2.40E-33    | 5.47E-32    |
| gene-Led04701-sp3 | 1.020378492  | 0.000928425 | 0.002263781 |
| gene-Led02139-sp3 | 2.622439796  | 2.67E-21    | 3.38E-20    |
| gene-Led10887-sp3 | 1.720236937  | 0.016148882 | 0.030814923 |
| gene-Led05522-sp3 | 2.789464052  | 1.70E-15    | 1.46E-14    |
| gene-Led06302-sp3 | 6.838242925  | 6.85E-36    | 1.80E-34    |
| gene-Led11422-sp3 | 2.261288504  | 3.47E-25    | 5.25E-24    |
| gene-Led07482-sp3 | 1.088814143  | 0.020582415 | 0.038265792 |
| gene-Led03435-sp3 | 0.783528597  | 8.52E-05    | 0.000245759 |
| gene-Led02641-sp3 | 2.159489739  | 3.10E-27    | 5.25E-26    |
| gene-Led10652-sp3 | 4.258069259  | 5.19E-71    | 4.79E-69    |
| gene-Led03532-sp3 | 1.643981777  | 3.16E-10    | 1.72E-09    |
| gene-Led09422-sp3 | 2.990431385  | 1.65E-33    | 3.79E-32    |
| gene-Led08008-sp3 | -2.259615616 | 9.24E-09    | 4.38E-08    |
| gene-Led10332-sp3 | 2.59848699   | 1.76E-33    | 4.02E-32    |
| gene-Led03550-sp3 | 3.750341784  | 5.39E-29    | 1.00E-27    |
| gene-Led00052-sp3 | 5.753935393  | 1.06E-37    | 3.00E-36    |
| gene-Led06836-sp3 | 2.456080133  | 2.10E-43    | 7.38E-42    |
| gene-Led01556-sp3 | 2.071450354  | 3.02E-11    | 1.81E-10    |
| gene-Led02321-sp3 | 1.202061233  | 5.18E-10    | 2.76E-09    |
| gene-Led03852-sp3 | 2.291211628  | 1.09E-18    | 1.19E-17    |
| gene-Led07056-sp3 | 5.307571394  | 7.46E-35    | 1.85E-33    |
| gene-Led01837-sp3 | 3.970930937  | 6.24E-49    | 2.64E-47    |
| gene-Led07543-sp3 | 2.621804232  | 8.42E-19    | 9.26E-18    |
| gene-Led02517-sp3 | 0.976186627  | 0.016402289 | 0.031239202 |
| gene-Led11358-sp3 | 6.036606068  | 1.82E-28    | 3.29E-27    |
| gene-Led10810-sp3 | 1.123742557  | 0.024256315 | 0.044269646 |
| gene-Led02846-sp3 | 1.573349897  | 1.11E-06    | 4.11E-06    |
| gene-Led00099-sp3 | 1.495620349  | 0.021208747 | 0.039285004 |
| gene-Led08610-sp3 | 2.434511095  | 0.000228805 | 0.000621475 |
| gene-Led02934-sp3 | 1.077077764  | 9.48E-15    | 7.60E-14    |
| gene-Led00888-sp3 | 1.026766906  | 1.98E-17    | 1.97E-16    |
| gene-Led10537-sp3 | 1.331601963  | 5.39E-10    | 2.86E-09    |
| gene-Led01955-sp3 | 4.857809477  | 9.58E-11    | 5.45E-10    |
| gene-Led05186-sp3 | 2.043827325  | 2.44E-15    | 2.05E-14    |

---

|                   |              |             |             |
|-------------------|--------------|-------------|-------------|
| gene-Led00016-sp3 | 2.121391301  | 1.74E-08    | 8.04E-08    |
| gene-Led02749-sp3 | 2.259062268  | 2.42E-18    | 2.56E-17    |
| gene-Led09307-sp3 | 1.129030111  | 0.00017671  | 0.000488686 |
| gene-Led01351-sp3 | 2.007981723  | 0.001131577 | 0.002716973 |
| gene-Led10208-sp3 | -1.382542131 | 3.56E-05    | 0.000107907 |
| gene-Led00973-sp3 | 3.477165483  | 9.85E-27    | 1.63E-25    |
| gene-Led07319-sp3 | 2.804464122  | 1.79E-21    | 2.28E-20    |
| gene-Led07833-sp3 | 2.458668928  | 2.50E-13    | 1.78E-12    |
| gene-Led06223-sp3 | 2.214944728  | 2.35E-43    | 8.17E-42    |
| gene-Led06652-sp3 | 0.729814028  | 0.016316806 | 0.031105845 |
| gene-Led09149-sp3 | 0.804498406  | 1.58E-05    | 5.02E-05    |
| gene-Led05945-sp3 | 2.069982721  | 1.78E-14    | 1.38E-13    |
| gene-Led10604-sp3 | 1.243354486  | 1.71E-15    | 1.46E-14    |
| gene-Led06320-sp3 | 1.34201285   | 6.27E-15    | 5.09E-14    |
| gene-Led05229-sp3 | 2.606155772  | 4.28E-21    | 5.39E-20    |
| gene-Led06722-sp3 | 3.534050922  | 1.16E-17    | 1.17E-16    |
| gene-Led03242-sp3 | 3.908165748  | 1.40E-26    | 2.29E-25    |
| gene-Led08815-sp3 | 6.409298325  | 1.93E-22    | 2.57E-21    |
| gene-Led00982-sp3 | 5.3394198    | 1.54E-25    | 2.37E-24    |
| gene-Led06214-sp3 | 3.822357883  | 1.67E-34    | 4.07E-33    |
| gene-Led02272-sp3 | 1.476820604  | 0.008474819 | 0.017192361 |
| gene-Led03650-sp3 | 2.17571397   | 4.42E-16    | 3.97E-15    |
| gene-Led00741-sp3 | 6.696057296  | 4.89E-194   | 4.10E-191   |
| gene-Led05827-sp3 | 3.007302994  | 4.64E-14    | 3.50E-13    |
| gene-Led09410-sp3 | 3.055251015  | 5.61E-41    | 1.77E-39    |
| gene-Led06420-sp3 | 2.531643559  | 6.36E-12    | 4.03E-11    |
| gene-Led04704-sp3 | 3.580438878  | 2.03E-20    | 2.43E-19    |
| gene-Led09953-sp3 | 1.344285325  | 0.020453687 | 0.038057868 |
| gene-Led04380-sp3 | 2.162226613  | 8.23E-22    | 1.07E-20    |
| gene-Led08171-sp3 | 1.577883303  | 4.13E-07    | 1.62E-06    |
| gene-Led05247-sp3 | 4.078515714  | 8.02E-34    | 1.88E-32    |
| gene-Led08566-sp3 | 2.142748853  | 0.00016866  | 0.000468744 |
| gene-Led08930-sp3 | 5.262780548  | 3.25E-34    | 7.78E-33    |
| gene-Led01934-sp3 | 1.208576806  | 1.11E-11    | 6.91E-11    |
| gene-Led06042-sp3 | 1.198402168  | 1.32E-12    | 8.82E-12    |
| gene-Led10511-sp3 | 1.458331423  | 1.61E-11    | 9.85E-11    |
| gene-Led07311-sp3 | 5.30882217   | 1.78E-57    | 1.05E-55    |
| gene-Led05449-sp3 | 0.978255683  | 0.000690509 | 0.001722078 |
| gene-Led00022-sp3 | 2.152566233  | 4.29E-17    | 4.12E-16    |
| gene-Led10582-sp3 | -1.208141521 | 1.17E-17    | 1.18E-16    |
| gene-Led10186-sp3 | 2.674992304  | 4.52E-61    | 2.95E-59    |
| gene-Led06848-sp3 | 5.040700623  | 2.63E-31    | 5.46E-30    |

---

|                   |              |             |             |
|-------------------|--------------|-------------|-------------|
| gene-Led08149-sp3 | 3.969906213  | 1.72E-29    | 3.30E-28    |
| gene-Led07784-sp3 | 3.25941888   | 3.16E-24    | 4.57E-23    |
| gene-Led06989-sp3 | 2.199192848  | 6.49E-16    | 5.74E-15    |
| gene-Led00091-sp3 | 3.936621296  | 1.11E-17    | 1.12E-16    |
| gene-Led10358-sp3 | 1.444382383  | 3.91E-07    | 1.54E-06    |
| gene-Led04558-sp3 | 2.483990501  | 2.87E-08    | 1.30E-07    |
| gene-Led00880-sp3 | 2.59045768   | 7.71E-28    | 1.34E-26    |
| gene-Led05208-sp3 | 1.947735753  | 1.03E-42    | 3.49E-41    |
| gene-Led01919-sp3 | 1.075600838  | 1.54E-06    | 5.60E-06    |
| gene-Led01145-sp3 | 4.97886061   | 3.31E-77    | 3.69E-75    |
| gene-Led03133-sp3 | 2.386533883  | 7.23E-24    | 1.03E-22    |
| gene-Led02268-sp3 | 1.412598685  | 5.17E-11    | 3.02E-10    |
| gene-Led00871-sp3 | 0.901156951  | 0.003769241 | 0.008186358 |
| gene-Led04154-sp3 | 1.367778881  | 9.33E-16    | 8.15E-15    |
| gene-Led09977-sp3 | 5.054665918  | 2.89E-29    | 5.47E-28    |
| gene-Led10063-sp3 | 2.556334094  | 1.07E-14    | 8.48E-14    |
| gene-Led10619-sp3 | 1.409059061  | 1.02E-17    | 1.04E-16    |
| gene-Led07652-sp3 | 0.484909184  | 0.000220654 | 0.000601447 |
| gene-Led10047-sp3 | 3.900969135  | 1.00E-43    | 3.60E-42    |
| gene-Led04379-sp3 | 1.155788366  | 0.000616086 | 0.001553809 |
| gene-Led01656-sp3 | 2.839759821  | 4.62E-48    | 1.89E-46    |
| gene-Led06335-sp3 | 1.630959366  | 8.61E-05    | 0.000248129 |
| gene-Led01084-sp3 | 5.556235904  | 1.36E-54    | 7.20E-53    |
| gene-Led08710-sp3 | 0.539337258  | 0.000267691 | 0.000718366 |
| gene-Led09745-sp3 | 2.189570818  | 6.45E-21    | 7.94E-20    |
| gene-Led01913-sp3 | 2.000550213  | 6.88E-15    | 5.56E-14    |
| gene-Led00040-sp3 | 3.305531394  | 8.53E-13    | 5.77E-12    |
| gene-Led08845-sp3 | -2.240552547 | 1.08E-17    | 1.09E-16    |
| gene-Led07316-sp3 | 5.369014257  | 3.01E-93    | 4.88E-91    |
| gene-Led07886-sp3 | 0.974853383  | 0.02529292  | 0.045853675 |
| gene-Led04388-sp3 | 6.46810033   | 9.78E-63    | 6.69E-61    |
| gene-Led09425-sp3 | 3.091306041  | 5.95E-33    | 1.34E-31    |
| gene-Led00206-sp3 | 1.941150315  | 0.000724754 | 0.001799451 |
| gene-Led00031-sp3 | 4.422231756  | 8.44E-18    | 8.60E-17    |
| gene-Led10117-sp3 | 2.150229905  | 5.95E-12    | 3.79E-11    |
| gene-Led10151-sp3 | 0.703448114  | 0.001921888 | 0.004419375 |
| gene-Led07208-sp3 | 1.488834483  | 5.63E-21    | 6.99E-20    |
| gene-Led11211-sp3 | 1.652506845  | 3.10E-17    | 3.03E-16    |
| gene-Led00941-sp3 | 0.64162905   | 0.002479758 | 0.005593498 |
| gene-Led09853-sp3 | 0.701485827  | 1.15E-06    | 4.26E-06    |
| gene-Led00456-sp3 | 1.038854065  | 3.78E-06    | 1.31E-05    |
| gene-Led03799-sp3 | 4.458560432  | 9.64E-69    | 8.22E-67    |

---

|                   |              |             |             |
|-------------------|--------------|-------------|-------------|
| gene-Led06081-sp3 | 5.559219372  | 1.68E-54    | 8.87E-53    |
| gene-Led02502-sp3 | 1.690296656  | 6.79E-45    | 2.46E-43    |
| gene-Led04190-sp3 | 0.771504218  | 0.004519806 | 0.009647753 |
| gene-Led00085-sp3 | 1.178443745  | 1.32E-10    | 7.42E-10    |
| gene-Led00215-sp3 | 0.667606129  | 0.00025159  | 0.000677146 |
| gene-Led03110-sp3 | 1.08293362   | 0.006551072 | 0.013591312 |
| gene-Led07005-sp3 | 5.869779569  | 6.45E-19    | 7.13E-18    |
| gene-Led10133-sp3 | 0.699241968  | 0.020619672 | 0.038327973 |
| gene-Led01465-sp3 | 5.358335387  | 4.64E-33    | 1.04E-31    |
| gene-Led08570-sp3 | 4.067901548  | 2.86E-32    | 6.22E-31    |
| gene-Led03526-sp3 | 3.310819546  | 5.29E-11    | 3.09E-10    |
| gene-Led03671-sp3 | -1.635393209 | 4.86E-07    | 1.89E-06    |
| gene-Led10349-sp3 | 1.253234187  | 5.82E-12    | 3.71E-11    |
| gene-Led10694-sp3 | 1.095285488  | 2.66E-07    | 1.07E-06    |
| gene-Led07790-sp3 | 1.326804411  | 5.64E-13    | 3.88E-12    |
| gene-Led10622-sp3 | 2.102190192  | 1.32E-16    | 1.24E-15    |
| gene-Led07789-sp3 | 0.816351863  | 0.006422641 | 0.013352402 |
| gene-Led01794-sp3 | 3.553772706  | 4.03E-27    | 6.79E-26    |
| gene-Led11317-sp3 | 4.123860984  | 8.61E-71    | 7.73E-69    |
| gene-Led08225-sp3 | 2.925688602  | 9.85E-51    | 4.40E-49    |
| gene-Led05872-sp3 | 4.432807128  | 2.17E-17    | 2.15E-16    |
| gene-Led00688-sp3 | -1.179104222 | 9.79E-15    | 7.83E-14    |
| gene-Led07246-sp3 | 6.979316141  | 2.25E-28    | 4.03E-27    |
| gene-Led05969-sp3 | 1.758444161  | 1.30E-13    | 9.48E-13    |
| gene-Led03973-sp3 | 0.691037642  | 9.74E-07    | 3.64E-06    |
| gene-Led07249-sp3 | 6.761476471  | 1.71E-27    | 2.93E-26    |
| gene-Led08718-sp3 | 4.288697514  | 4.24E-15    | 3.49E-14    |
| gene-Led03564-sp3 | 1.727957286  | 0.000447372 | 0.001156429 |
| gene-Led07014-sp3 | 0.803269529  | 0.026519358 | 0.047870011 |
| gene-Led05476-sp3 | 1.399663599  | 1.64E-15    | 1.41E-14    |
| gene-Led02184-sp3 | 0.872519653  | 1.62E-06    | 5.89E-06    |
| gene-Led01107-sp3 | 0.621240254  | 0.00240087  | 0.005433833 |
| gene-Led02435-sp3 | 2.166934148  | 8.68E-13    | 5.86E-12    |
| gene-Led04605-sp3 | 6.01787227   | 6.54E-84    | 8.33E-82    |
| gene-Led01707-sp3 | -1.702337186 | 1.18E-10    | 6.66E-10    |
| gene-Led00396-sp3 | 1.194958976  | 1.42E-08    | 6.62E-08    |
| gene-Led01198-sp3 | 1.544904782  | 3.91E-07    | 1.54E-06    |
| gene-Led01791-sp3 | 1.398518028  | 9.79E-15    | 7.83E-14    |
| gene-Led08974-sp3 | 1.517137927  | 1.70E-14    | 1.33E-13    |
| gene-Led10174-sp3 | 1.140836681  | 7.80E-14    | 5.79E-13    |
| gene-Led00698-sp3 | 2.190148346  | 2.28E-46    | 8.74E-45    |
| gene-Led05505-sp3 | 0.710771618  | 3.25E-10    | 1.77E-09    |

---

|                   |              |             |             |
|-------------------|--------------|-------------|-------------|
| gene-Led07664-sp3 | 1.158958077  | 0.002132277 | 0.004871977 |
| gene-Led03688-sp3 | 2.635680785  | 1.03E-12    | 6.92E-12    |
| gene-Led03075-sp3 | -1.876823445 | 1.02E-17    | 1.03E-16    |
| gene-Led09830-sp3 | 3.480064306  | 1.04E-13    | 7.67E-13    |
| gene-Led04972-sp3 | 5.460470567  | 1.26E-09    | 6.48E-09    |
| gene-Led02743-sp3 | 3.98055537   | 7.98E-33    | 1.78E-31    |
| gene-Led11005-sp3 | 1.282665478  | 2.19E-05    | 6.81E-05    |
| gene-Led10012-sp3 | 0.81535471   | 0.002858871 | 0.006379969 |
| gene-Led04157-sp3 | 3.454290094  | 5.85E-19    | 6.49E-18    |
| gene-Led04827-sp3 | 4.42923011   | 1.91E-10    | 1.06E-09    |
| gene-Led09167-sp3 | 2.629700993  | 2.99E-66    | 2.28E-64    |
| gene-Led09056-sp3 | 0.993076508  | 1.06E-07    | 4.49E-07    |
| gene-Led03479-sp3 | 7.652868353  | 5.54E-214   | 1.11E-210   |
| gene-Led08578-sp3 | 1.946558912  | 3.19E-14    | 2.43E-13    |
| gene-Led02039-sp3 | 3.677004053  | 7.20E-52    | 3.31E-50    |
| gene-Led06675-sp3 | 2.377711171  | 4.35E-20    | 5.14E-19    |
| gene-Led08607-sp3 | 6.15704572   | 7.10E-24    | 1.01E-22    |
| gene-Led04870-sp3 | 2.834913988  | 1.55E-09    | 7.92E-09    |
| gene-Led04129-sp3 | 2.604608458  | 5.23E-11    | 3.05E-10    |
| gene-Led01201-sp3 | 3.598099936  | 3.75E-26    | 6.01E-25    |
| gene-Led09684-sp3 | 1.981721738  | 1.57E-18    | 1.69E-17    |
| gene-Led03549-sp3 | 4.076190927  | 1.41E-63    | 1.01E-61    |
| gene-Led07410-sp3 | 6.554425793  | 1.47E-58    | 8.95E-57    |
| gene-Led10901-sp3 | 1.864097302  | 6.10E-11    | 3.55E-10    |
| gene-Led01261-sp3 | 4.020207864  | 5.25E-72    | 5.07E-70    |
| gene-Led00291-sp3 | 1.974371384  | 2.05E-13    | 1.47E-12    |
| gene-Led07198-sp3 | 2.538054649  | 5.98E-06    | 2.02E-05    |
| gene-Led00018-sp3 | 3.533723257  | 4.39E-25    | 6.59E-24    |
| gene-Led09818-sp3 | 1.940908294  | 1.70E-36    | 4.59E-35    |
| gene-Led02384-sp3 | 0.999065356  | 1.77E-10    | 9.86E-10    |
| gene-Led05947-sp3 | 0.852892204  | 0.000187499 | 0.000516676 |
| gene-Led03998-sp3 | 1.306918477  | 8.19E-09    | 3.90E-08    |
| gene-Led01761-sp3 | 1.143409592  | 0.010801855 | 0.0213742   |
| gene-Led07957-sp3 | 3.325573774  | 3.90E-35    | 9.84E-34    |
| gene-Led04459-sp3 | 8.993320154  | 2.53E-69    | 2.17E-67    |
| gene-Led02402-sp3 | 0.747301522  | 0.000131635 | 0.000370242 |
| gene-Led10053-sp3 | 2.328474273  | 2.27E-13    | 1.63E-12    |
| gene-Led01308-sp3 | 1.44026017   | 6.40E-14    | 4.78E-13    |
| gene-Led10548-sp3 | 6.983227795  | 2.24E-37    | 6.25E-36    |
| gene-Led10904-sp3 | 1.72395568   | 0.006308754 | 0.013150973 |
| gene-Led07308-sp3 | 2.486964673  | 4.08E-67    | 3.28E-65    |
| gene-Led10632-sp3 | 1.207675561  | 0.001623558 | 0.003787048 |

---

|                   |             |             |             |
|-------------------|-------------|-------------|-------------|
| gene-Led05627-sp3 | 0.850214071 | 1.98E-05    | 6.19E-05    |
| gene-Led00189-sp3 | 1.348272981 | 4.27E-10    | 2.29E-09    |
| gene-Led01121-sp3 | 9.917392224 | 2.87E-197   | 2.89E-194   |
| gene-Led07261-sp3 | 6.890990182 | 1.14E-48    | 4.75E-47    |
| gene-Led03284-sp3 | 3.056716448 | 9.70E-25    | 1.44E-23    |
| gene-Led09507-sp3 | 1.550007516 | 3.36E-09    | 1.66E-08    |
| gene-Led00054-sp3 | 5.389238481 | 3.20E-18    | 3.36E-17    |
| gene-Led06913-sp3 | 4.377020632 | 3.34E-15    | 2.78E-14    |
| gene-Led07817-sp3 | 3.53231193  | 2.66E-30    | 5.34E-29    |
| gene-Led07791-sp3 | 1.096954671 | 0.008465553 | 0.017177029 |
| gene-Led02348-sp3 | 2.92001406  | 3.72E-10    | 2.02E-09    |
| gene-Led00457-sp3 | 0.71660964  | 3.65E-07    | 1.44E-06    |
| gene-Led06712-sp3 | 1.165107947 | 0.002324031 | 0.005272977 |
| gene-Led03696-sp3 | 1.508452769 | 7.34E-11    | 4.22E-10    |
| gene-Led00658-sp3 | 1.709083364 | 3.40E-12    | 2.20E-11    |
| gene-Led01698-sp3 | 2.045605823 | 5.83E-23    | 7.98E-22    |
| gene-Led04337-sp3 | 0.565618388 | 4.03E-07    | 1.58E-06    |
| gene-Led04047-sp3 | 1.514013891 | 1.63E-05    | 5.16E-05    |
| gene-Led09537-sp3 | 1.85371354  | 2.36E-08    | 1.07E-07    |
| gene-Led02647-sp3 | 5.648657896 | 9.97E-231   | 3.34E-227   |
| gene-Led07847-sp3 | 1.994076766 | 6.69E-09    | 3.21E-08    |
| gene-Led01295-sp3 | 3.300101982 | 2.79E-20    | 3.32E-19    |
| gene-Led06694-sp3 | 1.157341187 | 0.000901715 | 0.002203998 |
| gene-Led10364-sp3 | 2.789837368 | 3.05E-11    | 1.82E-10    |
| gene-Led07088-sp3 | 0.727223988 | 0.000235975 | 0.000638707 |
| gene-Led08555-sp3 | 3.114664733 | 3.00E-132   | 9.72E-130   |
| gene-Led09187-sp3 | 1.135392247 | 0.000434125 | 0.001125659 |
| gene-Led00413-sp3 | 1.929652323 | 5.38E-10    | 2.86E-09    |
| gene-Led04711-sp3 | 7.496131599 | 4.19E-32    | 8.97E-31    |
| gene-Led03652-sp3 | 4.074617669 | 2.48E-26    | 4.03E-25    |
| gene-Led00646-sp3 | 0.868555808 | 0.000183325 | 0.000505866 |
| gene-Led07015-sp3 | 3.7725399   | 1.92E-35    | 4.87E-34    |
| gene-Led07524-sp3 | 2.29585221  | 1.14E-18    | 1.24E-17    |
| gene-Led10773-sp3 | 0.852128842 | 0.015491396 | 0.029669875 |
| gene-Led04211-sp3 | 2.03973619  | 1.29E-11    | 8.00E-11    |
| gene-Led03472-sp3 | 2.459953816 | 9.50E-23    | 1.29E-21    |
| gene-Led01871-sp3 | 1.078685984 | 0.000339104 | 0.00089567  |
| gene-Led05908-sp3 | 1.716168542 | 3.84E-12    | 2.48E-11    |
| gene-Led02229-sp3 | 1.373844869 | 0.000863006 | 0.002122276 |
| gene-Led06027-sp3 | 1.633239322 | 0.000761667 | 0.001884123 |
| gene-Led03809-sp3 | 1.42688922  | 4.31E-05    | 0.000129051 |
| gene-Led10856-sp3 | 2.358605513 | 6.50E-08    | 2.81E-07    |

---

|                   |              |             |             |
|-------------------|--------------|-------------|-------------|
| gene-Led06614-sp3 | 0.990627237  | 0.00022141  | 0.000603018 |
| gene-Led07213-sp3 | 1.408743226  | 0.0002453   | 0.000661987 |
| gene-Led06807-sp3 | 1.321257324  | 0.006279712 | 0.013094809 |
| gene-Led00682-sp3 | 1.385679523  | 0.000738916 | 0.0018319   |
| gene-Led08402-sp3 | 1.659505873  | 6.21E-10    | 3.28E-09    |
| gene-Led03407-sp3 | 0.787043025  | 0.006147168 | 0.012846087 |
| gene-Led03107-sp3 | 1.102507259  | 1.97E-10    | 1.09E-09    |
| gene-Led11023-sp3 | 5.760747473  | 9.78E-24    | 1.39E-22    |
| gene-Led07154-sp3 | 3.763274492  | 6.09E-23    | 8.33E-22    |
| gene-Led07782-sp3 | 1.396136768  | 0.000370164 | 0.000970571 |
| gene-Led03131-sp3 | 1.485183666  | 7.75E-08    | 3.32E-07    |
| gene-Led10513-sp3 | 1.567836401  | 7.77E-08    | 3.33E-07    |
| gene-Led02612-sp3 | -0.967490463 | 3.18E-07    | 1.26E-06    |
| gene-Led04056-sp3 | 4.125784486  | 2.38E-05    | 7.37E-05    |
| gene-Led09140-sp3 | 4.788224136  | 1.45E-110   | 3.47E-108   |
| gene-Led04284-sp3 | 0.883674841  | 0.002677207 | 0.005995847 |
| gene-Led06022-sp3 | 1.36088561   | 1.49E-05    | 4.75E-05    |
| gene-Led06916-sp3 | 1.220198929  | 0.000302411 | 0.000805523 |
| gene-Led08185-sp3 | 4.413526014  | 5.73E-51    | 2.57E-49    |
| gene-Led00042-sp3 | 4.33775343   | 1.39E-35    | 3.58E-34    |
| gene-Led06344-sp3 | 1.788020607  | 1.84E-24    | 2.70E-23    |
| gene-Led05268-sp3 | 2.648688366  | 4.74E-17    | 4.53E-16    |
| gene-Led03531-sp3 | 2.13172461   | 1.51E-19    | 1.74E-18    |
| gene-Led01494-sp3 | 2.058273879  | 3.22E-22    | 4.25E-21    |
| gene-Led01841-sp3 | 4.156683908  | 8.30E-54    | 4.24E-52    |
| gene-Led03418-sp3 | 2.13620808   | 8.86E-42    | 2.88E-40    |
| gene-Led02126-sp3 | 1.122306173  | 0.023973785 | 0.043817614 |
| gene-Led04003-sp3 | 0.895115567  | 0.000156386 | 0.000435957 |
| gene-Led06860-sp3 | 1.605133735  | 1.25E-11    | 7.74E-11    |
| gene-Led05811-sp3 | 1.137145456  | 0.001139626 | 0.002734993 |
| gene-Led05953-sp3 | 0.998786674  | 0.000158602 | 0.000441522 |
| gene-Led03747-sp3 | 0.617492554  | 0.000991627 | 0.002406802 |
| gene-Led06157-sp3 | 2.647195969  | 2.52E-10    | 1.39E-09    |
| gene-Led09673-sp3 | 0.914023408  | 0.023991004 | 0.043841118 |
| gene-Led04974-sp3 | 1.863585389  | 1.74E-34    | 4.22E-33    |
| gene-Led10975-sp3 | 0.645998121  | 0.011227465 | 0.022133642 |
| gene-Led03258-sp3 | 2.366643565  | 1.97E-10    | 1.09E-09    |
| gene-Led06083-sp3 | 3.952073595  | 1.67E-22    | 2.23E-21    |
| gene-Led03166-sp3 | 0.699919928  | 8.18E-06    | 2.71E-05    |
| gene-Led06362-sp3 | 4.104319393  | 3.72E-32    | 8.02E-31    |
| gene-Led10189-sp3 | 1.433531598  | 5.59E-09    | 2.69E-08    |
| gene-Led08158-sp3 | 1.561421559  | 0.000113203 | 0.000321454 |



---

|                   |              |             |             |
|-------------------|--------------|-------------|-------------|
| gene-Led00427-sp3 | 0.949575737  | 0.012755262 | 0.024906315 |
| gene-Led10581-sp3 | 8.889626211  | 2.54E-68    | 2.11E-66    |
| gene-Led01915-sp3 | 0.682740808  | 8.63E-06    | 2.85E-05    |
| gene-Led03810-sp3 | 3.549053849  | 4.75E-08    | 2.08E-07    |
| gene-Led04634-sp3 | 0.855132042  | 1.64E-08    | 7.59E-08    |
| gene-Led06952-sp3 | 4.519695643  | 2.01E-38    | 5.83E-37    |
| gene-Led10678-sp3 | 1.385192952  | 7.28E-10    | 3.81E-09    |
| gene-Led05861-sp3 | 2.685328762  | 2.48E-56    | 1.40E-54    |
| gene-Led05903-sp3 | 1.62860129   | 2.76E-06    | 9.75E-06    |
| gene-Led06839-sp3 | 4.068483996  | 2.39E-18    | 2.53E-17    |
| gene-Led05419-sp3 | 2.080854676  | 0.004115239 | 0.0088556   |
| gene-Led05870-sp3 | 2.072992252  | 2.93E-09    | 1.45E-08    |
| gene-Led00013-sp3 | 1.021760881  | 1.25E-10    | 7.03E-10    |
| gene-Led08167-sp3 | 0.952673415  | 2.66E-05    | 8.18E-05    |
| gene-Led05288-sp3 | 6.57882055   | 2.50E-48    | 1.03E-46    |
| gene-Led09448-sp3 | -0.697654276 | 5.40E-06    | 1.84E-05    |
| gene-Led08843-sp3 | 1.004701728  | 8.35E-05    | 0.00024125  |
| gene-Led07634-sp3 | 0.798732094  | 3.01E-05    | 9.24E-05    |
| gene-Led07231-sp3 | 1.833646218  | 0.001394835 | 0.003290163 |
| gene-Led04136-sp3 | 3.75441307   | 5.07E-56    | 2.83E-54    |
| gene-Led05615-sp3 | 1.53235143   | 1.73E-15    | 1.48E-14    |
| gene-Led06250-sp3 | 1.541766734  | 0.000219072 | 0.000597459 |
| gene-Led04821-sp3 | 1.039955752  | 0.000150894 | 0.000421581 |
| gene-Led09779-sp3 | -1.804211238 | 1.48E-05    | 4.71E-05    |
| gene-Led09362-sp3 | 5.22302175   | 4.15E-92    | 6.23E-90    |
| gene-Led03306-sp3 | 1.51619589   | 0.000107923 | 0.000307677 |
| gene-Led02754-sp3 | 0.906757954  | 7.00E-10    | 3.67E-09    |
| gene-Led07168-sp3 | 2.078751493  | 2.40E-17    | 2.37E-16    |
| gene-Led06143-sp3 | 1.968035576  | 3.26E-17    | 3.19E-16    |
| gene-Led06794-sp3 | 3.815806215  | 5.55E-49    | 2.35E-47    |
| gene-Led03902-sp3 | 4.330828744  | 6.02E-204   | 7.57E-201   |
| gene-Led03404-sp3 | 5.26085704   | 2.92E-29    | 5.50E-28    |
| gene-Led10540-sp3 | 2.939657063  | 5.39E-21    | 6.71E-20    |
| gene-Led10925-sp3 | 2.360998013  | 1.33E-16    | 1.24E-15    |
| gene-Led00670-sp3 | 1.476298495  | 3.52E-05    | 0.0001068   |
| gene-Led04705-sp3 | 5.295328999  | 1.33E-16    | 1.25E-15    |
| gene-Led09952-sp3 | 3.226334034  | 1.09E-21    | 1.40E-20    |
| gene-Led01891-sp3 | 1.383990997  | 1.11E-06    | 4.11E-06    |
| gene-Led07085-sp3 | 3.482926554  | 6.41E-15    | 5.20E-14    |
| gene-Led00729-sp3 | 1.981534607  | 5.28E-16    | 4.70E-15    |
| gene-Led05828-sp3 | 1.73694295   | 3.51E-18    | 3.68E-17    |
| gene-Led02084-sp3 | 1.01554773   | 0.001339609 | 0.003171796 |

---

|                   |              |             |             |
|-------------------|--------------|-------------|-------------|
| gene-Led07542-sp3 | 1.017963529  | 2.51E-06    | 8.91E-06    |
| gene-Led00068-sp3 | 5.636123084  | 2.26E-54    | 1.17E-52    |
| gene-Led10605-sp3 | 5.256459722  | 1.15E-106   | 2.58E-104   |
| gene-Led10246-sp3 | 1.27740927   | 0.000879021 | 0.002157441 |
| gene-Led10744-sp3 | 1.664483789  | 6.69E-14    | 4.99E-13    |
| gene-Led08061-sp3 | 1.169899499  | 0.012301441 | 0.024085633 |
| gene-Led07012-sp3 | 0.94170706   | 2.59E-10    | 1.42E-09    |
| gene-Led05420-sp3 | 2.395949277  | 2.66E-38    | 7.68E-37    |
| gene-Led04216-sp3 | 3.945771418  | 2.06E-16    | 1.90E-15    |
| gene-Led04698-sp3 | 3.96425709   | 3.28E-19    | 3.70E-18    |
| gene-Led09715-sp3 | 0.595371093  | 0.005177206 | 0.010939566 |
| gene-Led03649-sp3 | 1.303594719  | 2.72E-13    | 1.92E-12    |
| gene-Led01444-sp3 | -1.681211489 | 0.000292466 | 0.000781308 |
| gene-Led04885-sp3 | 4.925009562  | 6.58E-31    | 1.35E-29    |
| gene-Led04370-sp3 | 6.127451273  | 1.53E-55    | 8.45E-54    |
| gene-Led05722-sp3 | 2.600054497  | 4.10E-17    | 3.95E-16    |
| gene-Led10557-sp3 | 3.334300757  | 7.28E-12    | 4.60E-11    |
| gene-Led06747-sp3 | 0.653099185  | 0.003523279 | 0.007713788 |
| gene-Led11091-sp3 | 2.721935982  | 1.37E-36    | 3.72E-35    |
| gene-Led01044-sp3 | 1.390913274  | 3.04E-14    | 2.33E-13    |
| gene-Led01574-sp3 | 4.27860262   | 1.70E-34    | 4.15E-33    |
| gene-Led04770-sp3 | 1.155002889  | 0.003272792 | 0.007217219 |
| gene-Led05695-sp3 | 1.376219468  | 0.000463067 | 0.001194237 |
| gene-Led00998-sp3 | 4.56895024   | 2.64E-29    | 5.01E-28    |
| gene-Led02724-sp3 | 1.482123739  | 8.72E-08    | 3.71E-07    |
| gene-Led03496-sp3 | 1.256266693  | 0.000176694 | 0.000488686 |
| gene-Led00446-sp3 | -1.633655593 | 3.44E-10    | 1.87E-09    |
| gene-Led06985-sp3 | 7.062269034  | 3.54E-190   | 2.74E-187   |
| gene-Led03509-sp3 | 2.470278994  | 3.70E-19    | 4.15E-18    |
| gene-Led06683-sp3 | 1.737614461  | 7.37E-06    | 2.46E-05    |
| gene-Led03953-sp3 | 3.162568183  | 1.16E-12    | 7.80E-12    |
| gene-Led08688-sp3 | 1.931086502  | 1.70E-08    | 7.84E-08    |
| gene-Led01482-sp3 | 3.208352566  | 2.18E-11    | 1.32E-10    |
| gene-Led07333-sp3 | -1.180599721 | 0.001413547 | 0.003331175 |
| gene-Led03759-sp3 | 5.759924371  | 4.09E-57    | 2.39E-55    |
| gene-Led06210-sp3 | 0.712944163  | 1.56E-06    | 5.68E-06    |
| gene-Led00687-sp3 | 3.162033934  | 6.88E-08    | 2.97E-07    |
| gene-Led00543-sp3 | 1.085921151  | 0.000186327 | 0.000513588 |
| gene-Led01038-sp3 | 0.458604881  | 0.009754539 | 0.019515072 |
| gene-Led11070-sp3 | 6.076995072  | 2.30E-52    | 1.08E-50    |
| gene-Led09268-sp3 | 0.967729334  | 0.009774411 | 0.019548822 |
| gene-Led01938-sp3 | 0.897081013  | 1.23E-05    | 3.96E-05    |

---

|                   |              |             |             |
|-------------------|--------------|-------------|-------------|
| gene-Led02023-sp3 | 1.263360647  | 2.03E-17    | 2.02E-16    |
| gene-Led09544-sp3 | 4.710739404  | 6.28E-13    | 4.29E-12    |
| gene-Led03080-sp3 | 1.133178142  | 0.000197362 | 0.000541923 |
| gene-Led10460-sp3 | 2.495193427  | 1.05E-13    | 7.72E-13    |
| gene-Led07758-sp3 | 8.942454519  | 6.06E-151   | 2.77E-148   |
| gene-Led02672-sp3 | 3.495732334  | 2.48E-23    | 3.45E-22    |
| gene-Led05581-sp3 | 1.184876695  | 0.001268653 | 0.003015149 |
| gene-Led04695-sp3 | 1.304779927  | 0.000570753 | 0.001445571 |
| gene-Led00648-sp3 | 5.876347129  | 1.20E-18    | 1.31E-17    |
| gene-Led04111-sp3 | 1.212951429  | 3.13E-14    | 2.40E-13    |
| gene-Led01086-sp3 | 2.506486772  | 3.58E-52    | 1.67E-50    |
| gene-Led01404-sp3 | -1.506718522 | 2.70E-05    | 8.31E-05    |
| gene-Led10656-sp3 | 1.925502436  | 7.19E-09    | 3.44E-08    |
| gene-Led07169-sp3 | 1.645982706  | 4.64E-25    | 6.96E-24    |
| gene-Led02781-sp3 | 1.443042185  | 2.56E-13    | 1.81E-12    |
| gene-Led06372-sp3 | 0.853720759  | 0.000555596 | 0.001411513 |
| gene-Led00924-sp3 | 1.452227423  | 0.000141932 | 0.000397868 |
| gene-Led08588-sp3 | 1.019822199  | 0.007387215 | 0.015157203 |
| gene-Led08212-sp3 | 1.363129243  | 0.014076447 | 0.027242815 |
| gene-Led10653-sp3 | 1.011666407  | 2.14E-16    | 1.97E-15    |
| gene-Led07785-sp3 | -1.443498476 | 0.000224153 | 0.000609828 |
| gene-Led09218-sp3 | 1.108791534  | 0.019754863 | 0.036938912 |
| gene-Led09351-sp3 | 1.168196598  | 2.96E-15    | 2.47E-14    |
| gene-Led05016-sp3 | 2.636346379  | 4.37E-24    | 6.28E-23    |
| gene-Led09078-sp3 | 1.004580268  | 0.005634925 | 0.011832166 |
| gene-Led06999-sp3 | 1.664053922  | 2.09E-14    | 1.62E-13    |
| gene-Led02171-sp3 | 1.300897774  | 2.12E-07    | 8.64E-07    |
| gene-Led09820-sp3 | 3.46454555   | 4.34E-08    | 1.91E-07    |
| gene-Led07677-sp3 | 3.366140348  | 1.58E-11    | 9.70E-11    |
| gene-Led03727-sp3 | 1.334440123  | 4.34E-07    | 1.70E-06    |
| gene-Led08885-sp3 | 0.984993952  | 0.00014712  | 0.00041138  |
| gene-Led04307-sp3 | 0.58851908   | 0.007818503 | 0.01594778  |
| gene-Led01981-sp3 | 1.338899376  | 4.30E-05    | 0.000128761 |
| gene-Led08813-sp3 | -1.07216816  | 0.000864761 | 0.002125034 |
| gene-Led10853-sp3 | 1.845005936  | 4.91E-12    | 3.15E-11    |
| gene-Led01609-sp3 | 0.804234029  | 1.80E-15    | 1.54E-14    |
| gene-Led09186-sp3 | 0.870193429  | 0.002302925 | 0.00523217  |
| gene-Led05826-sp3 | 1.542180598  | 4.35E-05    | 0.000130234 |
| gene-Led05076-sp3 | 0.472886291  | 0.001046142 | 0.002529958 |
| gene-Led02915-sp3 | 2.454108278  | 5.64E-25    | 8.45E-24    |
| gene-Led04348-sp3 | 2.629564229  | 4.08E-09    | 2.00E-08    |
| gene-Led01693-sp3 | 7.571878429  | 4.89E-177   | 3.28E-174   |

---

|                   |              |             |             |
|-------------------|--------------|-------------|-------------|
| gene-Led10351-sp3 | 1.235362595  | 3.12E-11    | 1.86E-10    |
| gene-Led02343-sp3 | 1.044180293  | 0.000421936 | 0.001096314 |
| gene-Led07408-sp3 | 1.513827186  | 6.22E-06    | 2.10E-05    |
| gene-Led07442-sp3 | 0.835644114  | 0.003350427 | 0.007369034 |
| gene-Led09884-sp3 | 0.404835014  | 0.001371897 | 0.003239855 |
| gene-Led09828-sp3 | 1.945420436  | 2.79E-14    | 2.14E-13    |
| gene-Led02250-sp3 | -2.933077577 | 1.43E-15    | 1.24E-14    |
| gene-Led03560-sp3 | 1.265510729  | 1.72E-07    | 7.10E-07    |
| gene-Led00681-sp3 | 2.907414378  | 1.19E-07    | 5.00E-07    |
| gene-Led07010-sp3 | 0.745767128  | 1.83E-06    | 6.61E-06    |
| gene-Led00108-sp3 | 1.215764326  | 9.26E-05    | 0.000265839 |
| gene-Led03104-sp3 | 1.562768355  | 2.86E-09    | 1.42E-08    |
| gene-Led07468-sp3 | 1.330919971  | 0.00323137  | 0.007135263 |
| gene-Led06345-sp3 | 2.305230825  | 1.06E-21    | 1.37E-20    |
| gene-Led00021-sp3 | 3.502847633  | 8.18E-10    | 4.26E-09    |
| gene-Led02095-sp3 | 1.491892469  | 1.06E-12    | 7.15E-12    |
| gene-Led07063-sp3 | 0.580213483  | 0.013488695 | 0.0262011   |
| gene-Led04297-sp3 | 1.008699219  | 0.018009503 | 0.034023212 |
| gene-Led09138-sp3 | -0.678868012 | 0.026080301 | 0.047145159 |
| gene-Led06870-sp3 | 0.6160171    | 7.31E-06    | 2.44E-05    |
| gene-Led10325-sp3 | 1.559792816  | 4.23E-06    | 1.45E-05    |
| gene-Led07822-sp3 | -1.585131504 | 3.16E-08    | 1.42E-07    |
| gene-Led09748-sp3 | -1.628231888 | 1.14E-07    | 4.82E-07    |
| gene-Led10005-sp3 | 2.131226477  | 1.80E-28    | 3.27E-27    |
| gene-Led04105-sp3 | 0.587192545  | 0.003121149 | 0.006902488 |
| gene-Led08024-sp3 | 0.617952756  | 0.001672056 | 0.003891148 |
| gene-Led08396-sp3 | 1.069271007  | 0.000476073 | 0.001224952 |
| gene-Led07676-sp3 | 1.564106936  | 4.30E-10    | 2.31E-09    |
| gene-Led07926-sp3 | 0.75482348   | 0.003058698 | 0.00677548  |
| gene-Led04258-sp3 | 0.714856718  | 0.002891824 | 0.006442075 |
| gene-Led03144-sp3 | 1.708394069  | 1.95E-34    | 4.72E-33    |
| gene-Led04928-sp3 | 2.082642286  | 6.26E-10    | 3.31E-09    |
| gene-Led02494-sp3 | 8.922450655  | 0           | 0           |
| gene-Led05510-sp3 | 2.187272431  | 3.29E-09    | 1.62E-08    |
| gene-Led09366-sp3 | 1.318945634  | 9.74E-06    | 3.19E-05    |
| gene-Led04267-sp3 | 1.143413267  | 7.16E-08    | 3.08E-07    |
| gene-Led09683-sp3 | 1.729614516  | 0.013377613 | 0.026005417 |
| gene-Led04697-sp3 | 3.176854586  | 7.95E-12    | 5.02E-11    |
| gene-Led07037-sp3 | 1.21953469   | 3.10E-05    | 9.50E-05    |
| gene-Led03820-sp3 | -1.998655188 | 2.70E-16    | 2.47E-15    |
| gene-Led08119-sp3 | 0.82179399   | 0.014269545 | 0.027579377 |
| gene-Led00130-sp3 | 1.232594206  | 0.000958559 | 0.002330585 |

---

|                   |              |             |             |
|-------------------|--------------|-------------|-------------|
| gene-Led09565-sp3 | 4.992128403  | 9.32E-89    | 1.32E-86    |
| gene-Led06761-sp3 | 3.915386974  | 1.59E-55    | 8.74E-54    |
| gene-Led00017-sp3 | 2.130839394  | 1.59E-06    | 5.76E-06    |
| gene-Led00781-sp3 | 0.632009973  | 0.001995263 | 0.004577636 |
| gene-Led05189-sp3 | 1.843336912  | 4.16E-10    | 2.24E-09    |
| gene-Led11276-sp3 | 4.021218986  | 1.10E-10    | 6.24E-10    |
| gene-Led03846-sp3 | 0.551397562  | 0.013547349 | 0.026299794 |
| gene-Led03450-sp3 | 1.059595975  | 0.007102314 | 0.014626346 |
| gene-Led01152-sp3 | 1.384212955  | 2.90E-25    | 4.42E-24    |
| gene-Led11285-sp3 | 2.846969594  | 1.47E-27    | 2.53E-26    |
| gene-Led02459-sp3 | 2.972361132  | 9.38E-28    | 1.63E-26    |
| gene-Led08897-sp3 | 0.9078425    | 5.29E-07    | 2.05E-06    |
| gene-Led09538-sp3 | 2.903724407  | 2.69E-18    | 2.83E-17    |
| gene-Led02349-sp3 | 5.416596654  | 5.01E-38    | 1.42E-36    |
| gene-Led08696-sp3 | 0.442582809  | 0.022107752 | 0.040740156 |
| gene-Led02104-sp3 | 0.61213821   | 0.000502808 | 0.001287814 |
| gene-Led06286-sp3 | 0.703404555  | 0.002863713 | 0.00638794  |
| gene-Led11048-sp3 | 1.259853698  | 0.000193604 | 0.000532227 |
| gene-Led05350-sp3 | 4.095116036  | 2.61E-51    | 1.18E-49    |
| gene-Led09204-sp3 | 0.716041805  | 4.22E-05    | 0.000126601 |
| gene-Led07508-sp3 | 1.965056427  | 0.000112553 | 0.000319882 |
| gene-Led10601-sp3 | 1.717433738  | 1.83E-08    | 8.42E-08    |
| gene-Led02065-sp3 | 1.919655889  | 1.78E-55    | 9.76E-54    |
| gene-Led04914-sp3 | 1.680652177  | 1.91E-18    | 2.04E-17    |
| gene-Led02856-sp3 | 1.129193757  | 1.41E-19    | 1.63E-18    |
| gene-Led01831-sp3 | 0.840287828  | 0.001490578 | 0.003496324 |
| gene-Led07368-sp3 | 4.006947233  | 3.83E-34    | 9.12E-33    |
| gene-Led07297-sp3 | 3.491922642  | 8.63E-17    | 8.17E-16    |
| gene-Led05927-sp3 | 2.030499585  | 6.63E-23    | 9.04E-22    |
| gene-Led06613-sp3 | 2.632999241  | 1.19E-14    | 9.43E-14    |
| gene-Led09593-sp3 | 1.598431645  | 6.45E-23    | 8.80E-22    |
| gene-Led02330-sp3 | 5.634663619  | 1.13E-28    | 2.06E-27    |
| gene-Led01468-sp3 | 3.58795367   | 1.56E-21    | 2.01E-20    |
| gene-Led08180-sp3 | 0.818958317  | 2.04E-05    | 6.38E-05    |
| gene-Led10256-sp3 | -1.59256027  | 1.93E-09    | 9.74E-09    |
| gene-Led09470-sp3 | 1.374217878  | 3.58E-08    | 1.59E-07    |
| gene-Led04186-sp3 | 1.399659436  | 1.75E-05    | 5.52E-05    |
| gene-Led02398-sp3 | 1.344669693  | 1.18E-08    | 5.55E-08    |
| gene-Led07613-sp3 | 0.940656243  | 0.00046515  | 0.001198995 |
| gene-Led08886-sp3 | 4.642961702  | 1.88E-49    | 8.14E-48    |
| gene-Led10854-sp3 | 2.583828671  | 3.60E-19    | 4.05E-18    |
| gene-Led00254-sp3 | -0.496540014 | 0.01046513  | 0.020793812 |

---

|                   |              |             |             |
|-------------------|--------------|-------------|-------------|
| gene-Led04488-sp3 | 2.242100251  | 1.83E-25    | 2.81E-24    |
| gene-Led06476-sp3 | 1.314828107  | 3.15E-08    | 1.42E-07    |
| gene-Led02066-sp3 | 1.592072351  | 0.001275735 | 0.003031266 |
| gene-Led08117-sp3 | 0.654960183  | 0.022370892 | 0.041194879 |
| gene-Led00393-sp3 | 0.949910349  | 8.65E-11    | 4.94E-10    |
| gene-Led00850-sp3 | 5.442759696  | 6.43E-90    | 9.24E-88    |
| gene-Led02644-sp3 | 2.389924467  | 2.06E-05    | 6.43E-05    |
| gene-Led06229-sp3 | 1.072665871  | 3.09E-16    | 2.81E-15    |
| gene-Led01483-sp3 | 2.491230647  | 3.15E-05    | 9.62E-05    |
| gene-Led05676-sp3 | -3.314396514 | 1.75E-08    | 8.09E-08    |
| gene-Led07972-sp3 | 0.563326122  | 0.003853205 | 0.008343496 |
| gene-Led07670-sp3 | 1.290605437  | 1.13E-11    | 7.06E-11    |
| gene-Led05232-sp3 | 0.826743076  | 0.008450474 | 0.017160279 |
| gene-Led07334-sp3 | -1.200651897 | 1.04E-13    | 7.65E-13    |
| gene-Led05570-sp3 | 3.186214478  | 1.34E-13    | 9.77E-13    |
| gene-Led03429-sp3 | 1.046960622  | 0.012835602 | 0.025053462 |
| gene-Led09475-sp3 | 0.896199688  | 0.005251737 | 0.011083083 |
| gene-Led08012-sp3 | 1.530803459  | 2.08E-05    | 6.49E-05    |
| gene-Led10006-sp3 | 4.33279782   | 2.11E-48    | 8.77E-47    |
| gene-Led05901-sp3 | -1.047107423 | 0.000907385 | 0.002215902 |
| gene-Led07188-sp3 | 4.529955426  | 8.23E-37    | 2.25E-35    |
| gene-Led06875-sp3 | 1.180673732  | 8.85E-07    | 3.33E-06    |
| gene-Led02780-sp3 | 1.643864652  | 5.22E-06    | 1.78E-05    |
| gene-Led09693-sp3 | 1.275601207  | 5.98E-06    | 2.02E-05    |
| gene-Led03215-sp3 | 1.413358337  | 1.69E-12    | 1.11E-11    |
| gene-Led03430-sp3 | 1.605423977  | 4.15E-10    | 2.24E-09    |
| gene-Led07292-sp3 | 2.255183777  | 1.06E-13    | 7.80E-13    |
| gene-Led01233-sp3 | 1.018006174  | 9.01E-05    | 0.000259195 |
| gene-Led05048-sp3 | -0.973696438 | 0.010740794 | 0.021274302 |
| gene-Led05250-sp3 | 1.058288394  | 1.37E-06    | 5.01E-06    |
| gene-Led00094-sp3 | 2.320837707  | 1.42E-09    | 7.24E-09    |
| gene-Led05839-sp3 | 5.501924638  | 1.28E-66    | 1.01E-64    |
| gene-Led07781-sp3 | -1.794077513 | 1.35E-11    | 8.32E-11    |
| gene-Led04585-sp3 | 4.467174388  | 4.56E-63    | 3.19E-61    |
| gene-Led03489-sp3 | 1.653276692  | 2.68E-18    | 2.83E-17    |
| gene-Led07698-sp3 | 0.912706947  | 8.02E-08    | 3.43E-07    |
| gene-Led07369-sp3 | 1.058806274  | 4.70E-08    | 2.06E-07    |
| gene-Led04968-sp3 | 7.993678179  | 1.91E-54    | 9.99E-53    |
| gene-Led03007-sp3 | 1.301588838  | 0.00097423  | 0.002366862 |
| gene-Led04236-sp3 | 2.38327342   | 1.80E-31    | 3.77E-30    |
| gene-Led08686-sp3 | 6.919645257  | 2.30E-37    | 6.42E-36    |
| gene-Led02546-sp3 | -0.600452107 | 0.010579097 | 0.020999518 |

---

|                   |              |             |             |
|-------------------|--------------|-------------|-------------|
| gene-Led05188-sp3 | 0.843401553  | 0.000113421 | 0.000321967 |
| gene-Led10724-sp3 | 0.7461085    | 0.000907467 | 0.002215902 |
| gene-Led09827-sp3 | 1.955512769  | 1.75E-08    | 8.07E-08    |
| gene-Led04547-sp3 | 3.993680524  | 1.69E-12    | 1.11E-11    |
| gene-Led02458-sp3 | 3.59931005   | 1.48E-52    | 7.04E-51    |
| gene-Led00111-sp3 | 0.733418625  | 0.022759485 | 0.041833863 |
| gene-Led10992-sp3 | 5.171199351  | 1.09E-34    | 2.70E-33    |
| gene-Led09419-sp3 | 0.90007458   | 7.73E-07    | 2.93E-06    |
| gene-Led07545-sp3 | 2.327543779  | 2.39E-11    | 1.44E-10    |
| gene-Led08011-sp3 | 2.850878802  | 2.61E-16    | 2.39E-15    |
| gene-Led01910-sp3 | 3.499955554  | 2.92E-19    | 3.30E-18    |
| gene-Led01826-sp3 | 1.356956089  | 0.000879571 | 0.002158134 |
| gene-Led11444-sp3 | 1.227118275  | 0.004618739 | 0.009838051 |
| gene-Led11251-sp3 | 1.101314338  | 0.000303638 | 0.00080772  |
| gene-Led08840-sp3 | 1.268958407  | 0.003294687 | 0.007257547 |
| gene-Led03644-sp3 | 3.19626256   | 1.06E-11    | 6.64E-11    |
| gene-Led06859-sp3 | 0.528720733  | 9.74E-05    | 0.000279021 |
| gene-Led10193-sp3 | 1.447499098  | 0.00076828  | 0.001900016 |
| gene-Led05898-sp3 | -2.241362011 | 1.62E-32    | 3.55E-31    |
| gene-Led08458-sp3 | 3.502369084  | 7.65E-39    | 2.26E-37    |
| gene-Led09451-sp3 | 0.526116882  | 0.003838939 | 0.008317977 |
| gene-Led11260-sp3 | 1.907021204  | 8.26E-08    | 3.53E-07    |
| gene-Led04456-sp3 | 1.712796602  | 2.37E-08    | 1.08E-07    |
| gene-Led03589-sp3 | 0.876940382  | 3.76E-08    | 1.67E-07    |
| gene-Led09570-sp3 | 0.908334996  | 0.003945614 | 0.008523407 |
| gene-Led04358-sp3 | 1.415948917  | 0.000813057 | 0.002006313 |
| gene-Led04311-sp3 | 1.637858562  | 1.17E-17    | 1.18E-16    |
| gene-Led05464-sp3 | 1.29751406   | 5.49E-08    | 2.39E-07    |
| gene-Led02725-sp3 | 1.21570961   | 1.30E-07    | 5.42E-07    |
| gene-Led03333-sp3 | 1.361848329  | 0.006277178 | 0.013093292 |
| gene-Led06931-sp3 | 4.229135116  | 1.48E-49    | 6.45E-48    |
| gene-Led08549-sp3 | 2.654563483  | 1.64E-21    | 2.10E-20    |
| gene-Led02642-sp3 | 1.595299215  | 1.56E-31    | 3.29E-30    |
| gene-Led10119-sp3 | -0.692968579 | 0.007888119 | 0.016083255 |
| gene-Led08446-sp3 | 0.911341473  | 0.000529789 | 0.001352784 |
| gene-Led10045-sp3 | 0.921291056  | 0.001836855 | 0.004242271 |
| gene-Led01298-sp3 | 2.171838011  | 0.000118421 | 0.000335233 |
| gene-Led07891-sp3 | -0.883881123 | 0.01043769  | 0.020751588 |
| gene-Led06655-sp3 | 1.077683449  | 3.21E-05    | 9.80E-05    |
| gene-Led06333-sp3 | 0.843520372  | 0.007982725 | 0.016262964 |
| gene-Led02135-sp3 | 0.94988173   | 0.002996885 | 0.006654012 |
| gene-Led03445-sp3 | 0.669479078  | 0.000198105 | 0.000543815 |

---

|                   |              |             |             |
|-------------------|--------------|-------------|-------------|
| gene-Led03116-sp3 | 0.592970503  | 0.001533145 | 0.003588636 |
| gene-Led07965-sp3 | 2.200899043  | 5.09E-11    | 2.97E-10    |
| gene-Led03083-sp3 | 1.005514361  | 2.05E-06    | 7.35E-06    |
| gene-Led03655-sp3 | 1.854440877  | 2.13E-15    | 1.80E-14    |
| gene-Led05345-sp3 | 1.815362078  | 8.92E-16    | 7.80E-15    |
| gene-Led08023-sp3 | 1.280831951  | 4.72E-08    | 2.07E-07    |
| gene-Led06810-sp3 | 1.286745155  | 1.95E-05    | 6.13E-05    |
| gene-Led05843-sp3 | -3.643996469 | 7.36E-16    | 6.50E-15    |
| gene-Led05271-sp3 | 2.082536549  | 2.76E-09    | 1.37E-08    |
| gene-Led03785-sp3 | 1.551622127  | 1.04E-22    | 1.41E-21    |
| gene-Led05070-sp3 | 0.918959511  | 0.00203125  | 0.004655951 |
| gene-Led01705-sp3 | 2.061528575  | 8.47E-11    | 4.84E-10    |
| gene-Led07862-sp3 | -1.608223087 | 1.49E-05    | 4.74E-05    |
| gene-Led06321-sp3 | 2.659749339  | 2.31E-43    | 8.05E-42    |
| gene-Led05503-sp3 | 0.775197898  | 1.29E-05    | 4.16E-05    |
| gene-Led10827-sp3 | 1.015001663  | 3.18E-07    | 1.26E-06    |
| gene-Led09552-sp3 | 1.041783365  | 1.12E-08    | 5.28E-08    |
| gene-Led07438-sp3 | 1.26283097   | 2.13E-08    | 9.75E-08    |
| gene-Led01403-sp3 | 1.385843436  | 3.55E-06    | 1.23E-05    |
| gene-Led10172-sp3 | 3.853770064  | 1.85E-45    | 6.80E-44    |
| gene-Led09315-sp3 | 1.187466993  | 1.45E-05    | 4.61E-05    |
| gene-Led04110-sp3 | 2.112915777  | 3.14E-05    | 9.61E-05    |
| gene-Led03045-sp3 | 6.66052784   | 1.95E-31    | 4.07E-30    |
| gene-Led06102-sp3 | 2.73844155   | 2.01E-12    | 1.32E-11    |
| gene-Led10859-sp3 | 1.979298567  | 0.000383327 | 0.00100065  |
| gene-Led06730-sp3 | 2.684722042  | 2.83E-06    | 9.99E-06    |
| gene-Led03477-sp3 | -1.395131705 | 1.62E-14    | 1.26E-13    |
| gene-Led01631-sp3 | 4.519910659  | 6.70E-150   | 2.93E-147   |
| gene-Led10916-sp3 | 4.011577765  | 3.84E-17    | 3.71E-16    |
| gene-Led06919-sp3 | -0.990421995 | 0.004315456 | 0.009258715 |
| gene-Led01727-sp3 | -0.77398468  | 0.000232859 | 0.000631632 |
| gene-Led02150-sp3 | 0.891007276  | 2.32E-14    | 1.79E-13    |
| gene-Led10046-sp3 | 0.49793385   | 0.001234849 | 0.002942458 |
| gene-Led01552-sp3 | 3.300112005  | 3.76E-07    | 1.48E-06    |
| gene-Led07586-sp3 | 1.015195095  | 0.01392328  | 0.026967138 |
| gene-Led04509-sp3 | 0.60306375   | 0.00911106  | 0.018338811 |
| gene-Led01382-sp3 | 0.611847222  | 0.026797599 | 0.04834529  |
| gene-Led10862-sp3 | 1.146569844  | 9.51E-05    | 0.000272814 |
| gene-Led09987-sp3 | 0.635197066  | 0.002184669 | 0.004980372 |
| gene-Led09298-sp3 | 1.755748572  | 1.91E-09    | 9.65E-09    |
| gene-Led06603-sp3 | -2.54952958  | 6.14E-09    | 2.95E-08    |
| gene-Led04325-sp3 | 0.670178479  | 0.0011198   | 0.002692553 |



---

|                   |              |             |             |
|-------------------|--------------|-------------|-------------|
| gene-Led01591-sp3 | 1.601655435  | 1.05E-10    | 5.94E-10    |
| gene-Led07116-sp3 | 0.938883673  | 4.69E-10    | 2.51E-09    |
| gene-Led09033-sp3 | 1.895442751  | 2.90E-11    | 1.74E-10    |
| gene-Led03199-sp3 | 0.682238947  | 0.000820128 | 0.002021472 |
| gene-Led07916-sp3 | 0.754825718  | 0.000239813 | 0.00064805  |
| gene-Led01972-sp3 | 0.882279405  | 3.21E-09    | 1.59E-08    |
| gene-Led06313-sp3 | 1.472194657  | 0.002291144 | 0.005207758 |
| gene-Led05509-sp3 | 0.49297199   | 0.020296593 | 0.037818291 |
| gene-Led05137-sp3 | 2.23887508   | 4.92E-09    | 2.39E-08    |
| gene-Led01531-sp3 | 1.028436544  | 0.001790558 | 0.004142005 |
| gene-Led04991-sp3 | -0.580609096 | 0.000463831 | 0.001195902 |
| gene-Led05785-sp3 | 2.188579098  | 3.47E-15    | 2.89E-14    |
| gene-Led06829-sp3 | 1.425878986  | 5.63E-05    | 0.000166251 |
| gene-Led07590-sp3 | -1.220934176 | 0.000398608 | 0.001038921 |
| gene-Led04078-sp3 | 1.229442945  | 8.61E-24    | 1.23E-22    |
| gene-Led04460-sp3 | 0.959088702  | 9.26E-06    | 3.05E-05    |
| gene-Led00067-sp3 | 0.662887203  | 0.010974998 | 0.021674166 |
| gene-Led05412-sp3 | 0.742103688  | 0.007515183 | 0.015382114 |
| gene-Led00295-sp3 | 1.771716557  | 4.39E-33    | 9.91E-32    |
| gene-Led02810-sp3 | 0.582552202  | 0.025085684 | 0.045543647 |
| gene-Led10843-sp3 | 1.076304826  | 0.002697367 | 0.006036963 |
| gene-Led11392-sp3 | 0.548288132  | 0.004559219 | 0.009721566 |
| gene-Led01045-sp3 | 0.622617081  | 0.00104182  | 0.002520162 |
| gene-Led00852-sp3 | 0.664902937  | 1.09E-05    | 3.53E-05    |
| gene-Led05894-sp3 | 0.377230834  | 0.024438749 | 0.044562172 |
| gene-Led02367-sp3 | -1.192748986 | 0.000408654 | 0.001062903 |
| gene-Led08113-sp3 | 0.432979788  | 0.022827781 | 0.041944067 |
| gene-Led01920-sp3 | 0.928574683  | 0.004027765 | 0.008680364 |
| gene-Led05385-sp3 | 0.654495445  | 5.60E-06    | 1.90E-05    |
| gene-Led08940-sp3 | 0.579825211  | 0.003763602 | 0.008177644 |
| gene-Led10896-sp3 | 0.493391204  | 0.007455681 | 0.015278981 |
| gene-Led03470-sp3 | 1.438177396  | 0.000114908 | 0.000325836 |
| gene-Led04694-sp3 | 1.270611549  | 0.006251478 | 0.013047803 |
| gene-Led01537-sp3 | 3.560881294  | 1.79E-09    | 9.06E-09    |
| gene-Led04187-sp3 | 1.412728426  | 1.21E-05    | 3.92E-05    |
| gene-Led07149-sp3 | 3.701225926  | 3.03E-40    | 9.38E-39    |
| gene-Led10372-sp3 | 0.717467972  | 6.58E-07    | 2.52E-06    |
| gene-Led05563-sp3 | 1.299843221  | 1.18E-07    | 4.95E-07    |
| gene-Led06645-sp3 | 0.794689995  | 0.002028934 | 0.004651703 |
| gene-Led06271-sp3 | 3.725275586  | 2.51E-07    | 1.01E-06    |
| gene-Led10731-sp3 | 0.835380302  | 7.69E-08    | 3.30E-07    |
| gene-Led03417-sp3 | 1.278672313  | 6.56E-06    | 2.21E-05    |

---

|                   |              |             |             |
|-------------------|--------------|-------------|-------------|
| gene-Led07709-sp3 | 0.339832754  | 0.023209784 | 0.042573522 |
| gene-Led10809-sp3 | 1.091677217  | 0.00485051  | 0.010292496 |
| gene-Led10564-sp3 | 0.837200835  | 0.009929233 | 0.01983788  |
| gene-Led09364-sp3 | 2.041616825  | 1.83E-07    | 7.55E-07    |
| gene-Led10528-sp3 | -0.832564398 | 2.45E-07    | 9.90E-07    |
| gene-Led08890-sp3 | 0.545707639  | 0.001242885 | 0.002958102 |
| gene-Led08273-sp3 | 0.846379847  | 0.000103809 | 0.000296791 |
| gene-Led05000-sp3 | 4.245495358  | 4.41E-07    | 1.72E-06    |
| gene-Led02187-sp3 | 0.718316871  | 0.001700972 | 0.003952952 |
| gene-Led01823-sp3 | 1.667763144  | 8.80E-06    | 2.91E-05    |
| gene-Led07102-sp3 | -1.367141658 | 0.000900878 | 0.002203021 |
| gene-Led05142-sp3 | 2.762190766  | 1.34E-19    | 1.55E-18    |
| gene-Led00717-sp3 | 2.10477794   | 7.57E-08    | 3.25E-07    |
| gene-Led07008-sp3 | -1.137306406 | 1.85E-15    | 1.58E-14    |
| gene-Led08709-sp3 | 0.852896879  | 2.96E-06    | 1.04E-05    |
| gene-Led01939-sp3 | 0.720749751  | 0.001221375 | 0.00291173  |
| gene-Led01529-sp3 | 0.757913578  | 0.010645191 | 0.021105723 |
| gene-Led01535-sp3 | 2.119701334  | 0.000174132 | 0.000482219 |
| gene-Led04696-sp3 | 3.085245758  | 9.22E-08    | 3.92E-07    |
| gene-Led09717-sp3 | 0.798756591  | 0.00154804  | 0.003621816 |
| gene-Led00768-sp3 | 0.685902335  | 0.003712826 | 0.008079534 |
| gene-Led10657-sp3 | 0.886626658  | 4.30E-08    | 1.90E-07    |
| gene-Led02899-sp3 | 1.043425141  | 4.65E-05    | 0.00013847  |
| gene-Led11265-sp3 | 1.050329349  | 2.72E-07    | 1.09E-06    |
| gene-Led05276-sp3 | -1.022410897 | 1.33E-06    | 4.91E-06    |
| gene-Led02366-sp3 | 1.189419316  | 0.00021624  | 0.000590215 |
| gene-Led01808-sp3 | 2.882142176  | 2.93E-13    | 2.06E-12    |
| gene-Led04995-sp3 | 0.580018771  | 6.47E-06    | 2.18E-05    |
| gene-Led09460-sp3 | 0.524956402  | 0.009070754 | 0.018268651 |
| gene-Led06539-sp3 | 1.872032203  | 0.002550375 | 0.005741198 |
| gene-Led04290-sp3 | 1.877856775  | 4.94E-15    | 4.05E-14    |
| gene-Led07300-sp3 | -3.094875813 | 5.93E-17    | 5.65E-16    |
| gene-Led02138-sp3 | -0.479884769 | 0.027185194 | 0.04896794  |
| gene-Led05523-sp3 | 0.625687619  | 0.004488792 | 0.00958562  |
| gene-Led01515-sp3 | 0.87817121   | 7.74E-07    | 2.93E-06    |
| gene-Led05106-sp3 | 0.973958138  | 0.000400643 | 0.001043144 |
| gene-Led05408-sp3 | 1.133819016  | 0.008455134 | 0.017166278 |
| gene-Led05236-sp3 | 1.90543583   | 0.000154493 | 0.000431037 |
| gene-Led03635-sp3 | -1.197686516 | 0.016691686 | 0.031766315 |
| gene-Led04983-sp3 | 0.43975726   | 0.012935355 | 0.025228582 |
| gene-Led02795-sp3 | 1.866811529  | 5.27E-12    | 3.36E-11    |
| gene-Led02802-sp3 | -1.256172274 | 1.30E-06    | 4.79E-06    |

|                   |              |             |             |
|-------------------|--------------|-------------|-------------|
| gene-Led09797-sp3 | -0.801370887 | 0.009098832 | 0.018317865 |
| gene-Led06729-sp3 | 1.140262759  | 1.38E-09    | 7.06E-09    |
| gene-Led02405-sp3 | 0.430629312  | 0.009283743 | 0.018660249 |
| gene-Led02176-sp3 | 1.341437874  | 0.000321151 | 0.000851605 |
| gene-Led06063-sp3 | 0.821035457  | 4.57E-06    | 1.57E-05    |
| gene-Led01681-sp3 | 0.691493315  | 0.018002592 | 0.034022936 |
| gene-Led01165-sp3 | 0.462568129  | 0.022381492 | 0.041202838 |
| gene-Led07346-sp3 | 0.9137825    | 0.018876032 | 0.03544057  |
| gene-Led01901-sp3 | 0.494770286  | 0.023445955 | 0.042962181 |
| gene-Led06779-sp3 | 0.502317648  | 0.015492761 | 0.029669875 |
| gene-Led08903-sp3 | 0.569099607  | 7.72E-05    | 0.000224031 |
| gene-Led10589-sp3 | 1.754946912  | 0.001576748 | 0.003684697 |
| gene-Led02926-sp3 | 0.860401187  | 6.38E-09    | 3.06E-08    |
| gene-Led00264-sp3 | 0.590047516  | 0.003971857 | 0.008578256 |

**Table S6 Yellow module DEGS list filtered by Upset Venn diagram**

| gene              | LeC7d_vs_LeC60d_log2FoldChange | LeC7d_vs_LeC60d_pvalue | LeC7d_vs_LeC60d_padj |
|-------------------|--------------------------------|------------------------|----------------------|
| gene-Led01180-sp3 | 3.602319152                    | 3.59E-44               | 6.48E-43             |
| gene-Led10638-sp3 | 2.851330455                    | 2.04E-21               | 1.32E-20             |
| gene-Led05170-sp3 | 2.284945038                    | 1.94E-12               | 7.40E-12             |
| gene-Led05888-sp3 | 4.298459828                    | 2.54E-33               | 2.89E-32             |
| gene-Led08154-sp3 | 3.936522594                    | 3.32E-48               | 6.89E-47             |
| gene-Led05808-sp3 | 2.509157077                    | 6.91E-69               | 3.12E-67             |
| gene-Led01311-sp3 | 0.685682613                    | 5.67E-05               | 0.000114216          |
| gene-Led00420-sp3 | 1.577540623                    | 5.30E-14               | 2.25E-13             |
| gene-Led09189-sp3 | 1.695783507                    | 2.28E-37               | 3.07E-36             |
| gene-Led02123-sp3 | 2.948774977                    | 4.04E-57               | 1.14E-55             |
| gene-Led00135-sp3 | 2.140588441                    | 2.52E-23               | 1.80E-22             |
| gene-Led10099-sp3 | 3.016390347                    | 3.14E-57               | 8.88E-56             |
| gene-Led02464-sp3 | 2.849381648                    | 1.37E-42               | 2.30E-41             |
| gene-Led00071-sp3 | 2.994977843                    | 4.04E-11               | 1.41E-10             |
| gene-Led10272-sp3 | 1.672609376                    | 2.41E-13               | 9.82E-13             |
| gene-Led02076-sp3 | 3.647785737                    | 2.88E-84               | 2.04E-82             |
| gene-Led06019-sp3 | 4.935221285                    | 1.23E-38               | 1.76E-37             |
| gene-Led02499-sp3 | 3.969637998                    | 4.95E-35               | 6.10E-34             |
| gene-Led06002-sp3 | 3.030876682                    | 2.97E-26               | 2.45E-25             |
| gene-Led08318-sp3 | 3.402349808                    | 1.13E-39               | 1.70E-38             |
| gene-Led09541-sp3 | 3.541115658                    | 3.80E-21               | 2.42E-20             |

---

|                   |              |             |             |
|-------------------|--------------|-------------|-------------|
| gene-Led02369-sp3 | 1.394175807  | 1.01E-23    | 7.40E-23    |
| gene-Led05207-sp3 | 6.836567375  | 1.83E-70    | 8.85E-69    |
| gene-Led11273-sp3 | 3.017552829  | 2.57E-25    | 2.03E-24    |
| gene-Led10789-sp3 | 4.09344091   | 3.90E-43    | 6.71E-42    |
| gene-Led04561-sp3 | 0.640300505  | 0.00041466  | 0.000763905 |
| gene-Led04360-sp3 | 4.015485309  | 3.47E-40    | 5.32E-39    |
| gene-Led06838-sp3 | 3.64730687   | 3.56E-44    | 6.44E-43    |
| gene-Led04635-sp3 | 6.820709853  | 2.62E-204   | 1.38E-201   |
| gene-Led05102-sp3 | 8.154768394  | 0           | 0           |
| gene-Led00307-sp3 | 1.798310133  | 2.66E-24    | 2.00E-23    |
| gene-Led10319-sp3 | 2.89479986   | 8.14E-44    | 1.44E-42    |
| gene-Led04126-sp3 | 3.539755718  | 3.61E-32    | 3.89E-31    |
| gene-Led10800-sp3 | 6.369450331  | 3.96E-210   | 2.34E-207   |
| gene-Led10556-sp3 | 3.199756485  | 6.12E-29    | 5.67E-28    |
| gene-Led05062-sp3 | 7.749417368  | 1.14E-65    | 4.48E-64    |
| gene-Led01747-sp3 | 5.519452205  | 5.17E-97    | 4.82E-95    |
| gene-Led03248-sp3 | 3.100254281  | 1.06E-56    | 2.91E-55    |
| gene-Led01318-sp3 | 2.707101946  | 5.25E-55    | 1.36E-53    |
| gene-Led04816-sp3 | 0.798270351  | 0.001004437 | 0.001770267 |
| gene-Led02401-sp3 | 1.958535329  | 2.82E-32    | 3.06E-31    |
| gene-Led07402-sp3 | 1.084413129  | 1.95E-05    | 4.11E-05    |
| gene-Led05140-sp3 | 3.176387027  | 1.89E-18    | 1.03E-17    |
| gene-Led07463-sp3 | 1.792265401  | 1.41E-17    | 7.29E-17    |
| gene-Led04066-sp3 | 4.691009326  | 6.86E-96    | 6.27E-94    |
| gene-Led04911-sp3 | 5.750911578  | 2.03E-57    | 5.79E-56    |
| gene-Led04564-sp3 | 2.685173262  | 1.96E-25    | 1.55E-24    |
| gene-Led08181-sp3 | 3.091722796  | 4.67E-65    | 1.80E-63    |
| gene-Led04123-sp3 | 3.47872035   | 1.54E-64    | 5.81E-63    |
| gene-Led08548-sp3 | 0.33490284   | 0.016569513 | 0.024699484 |
| gene-Led01310-sp3 | 1.535438975  | 1.64E-25    | 1.31E-24    |
| gene-Led06769-sp3 | 1.352778076  | 1.14E-12    | 4.43E-12    |
| gene-Led01848-sp3 | 0.857510003  | 0.004090849 | 0.006657812 |
| gene-Led07212-sp3 | 4.420615267  | 4.48E-145   | 9.38E-143   |
| gene-Led00334-sp3 | 1.642590856  | 1.46E-18    | 8.02E-18    |
| gene-Led08246-sp3 | 0.677426257  | 0.00011385  | 0.000222153 |
| gene-Led08563-sp3 | 1.971723796  | 1.25E-11    | 4.50E-11    |
| gene-Led10585-sp3 | 1.003406291  | 0.000888924 | 0.001575799 |
| gene-Led03861-sp3 | -1.202789088 | 1.91E-17    | 9.83E-17    |
| gene-Led05060-sp3 | 1.94556818   | 4.11E-26    | 3.37E-25    |
| gene-Led01148-sp3 | 3.024247729  | 1.01E-78    | 6.20E-77    |
| gene-Led03190-sp3 | 1.786210464  | 8.35E-15    | 3.71E-14    |
| gene-Led08443-sp3 | 1.205009205  | 1.14E-19    | 6.69E-19    |

---

|                   |             |             |             |
|-------------------|-------------|-------------|-------------|
| gene-Led07117-sp3 | 7.672328849 | 5.62E-78    | 3.36E-76    |
| gene-Led08569-sp3 | 6.002980904 | 1.91E-245   | 2.40E-242   |
| gene-Led06951-sp3 | 6.628204334 | 4.21E-58    | 1.23E-56    |
| gene-Led02408-sp3 | 1.452062104 | 7.71E-22    | 5.12E-21    |
| gene-Led09812-sp3 | 1.745759183 | 2.94E-14    | 1.27E-13    |
| gene-Led01964-sp3 | 3.202987204 | 9.50E-07    | 2.27E-06    |
| gene-Led11092-sp3 | 1.751364344 | 4.78E-12    | 1.77E-11    |
| gene-Led07397-sp3 | 4.459374924 | 2.99E-39    | 4.40E-38    |
| gene-Led00037-sp3 | 2.998989138 | 2.09E-29    | 1.98E-28    |
| gene-Led10799-sp3 | 2.168819497 | 1.37E-45    | 2.61E-44    |
| gene-Led08977-sp3 | 1.643501095 | 7.03E-11    | 2.41E-10    |
| gene-Led06159-sp3 | 0.380685761 | 0.031162873 | 0.044355141 |
| gene-Led01888-sp3 | 4.12068743  | 3.51E-79    | 2.19E-77    |
| gene-Led02390-sp3 | 2.193292984 | 1.01E-09    | 3.17E-09    |
| gene-Led10054-sp3 | 6.297520609 | 2.59E-48    | 5.43E-47    |
| gene-Led01433-sp3 | 2.191473773 | 3.79E-22    | 2.55E-21    |
| gene-Led02036-sp3 | 3.006712077 | 1.20E-24    | 9.17E-24    |
| gene-Led00019-sp3 | 3.649873527 | 4.10E-29    | 3.84E-28    |
| gene-Led05604-sp3 | 3.391269258 | 9.14E-36    | 1.15E-34    |
| gene-Led04836-sp3 | 1.069677262 | 9.14E-08    | 2.41E-07    |
| gene-Led05752-sp3 | 2.361918384 | 4.37E-39    | 6.37E-38    |
| gene-Led03421-sp3 | 3.675881748 | 5.12E-42    | 8.34E-41    |
| gene-Led10746-sp3 | 0.297519732 | 0.034724475 | 0.048973786 |
| gene-Led08250-sp3 | 2.677141115 | 4.01E-49    | 8.70E-48    |
| gene-Led01870-sp3 | 2.283649353 | 1.72E-57    | 4.91E-56    |
| gene-Led07083-sp3 | 1.515487365 | 1.19E-19    | 6.98E-19    |
| gene-Led11391-sp3 | 3.291369595 | 4.06E-62    | 1.37E-60    |
| gene-Led10244-sp3 | 2.365289872 | 4.88E-39    | 7.07E-38    |
| gene-Led05235-sp3 | 0.761780562 | 1.12E-06    | 2.66E-06    |
| gene-Led01674-sp3 | 3.366863868 | 9.05E-76    | 5.14E-74    |
| gene-Led03701-sp3 | 3.601634359 | 5.03E-28    | 4.51E-27    |
| gene-Led03854-sp3 | 2.219585099 | 4.60E-12    | 1.71E-11    |
| gene-Led06120-sp3 | 4.75547349  | 2.59E-85    | 1.93E-83    |
| gene-Led10807-sp3 | 1.213562687 | 0.001793758 | 0.00306313  |
| gene-Led09753-sp3 | 5.466375584 | 2.24E-119   | 3.41E-117   |
| gene-Led07874-sp3 | 2.759894223 | 4.84E-17    | 2.44E-16    |
| gene-Led05328-sp3 | 2.370862664 | 6.13E-26    | 4.99E-25    |
| gene-Led06492-sp3 | 2.488232091 | 8.94E-37    | 1.18E-35    |
| gene-Led07988-sp3 | 2.106868789 | 3.82E-28    | 3.44E-27    |
| gene-Led04749-sp3 | 2.927085247 | 1.78E-44    | 3.27E-43    |
| gene-Led03170-sp3 | 3.221082628 | 1.64E-29    | 1.57E-28    |
| gene-Led01384-sp3 | 2.2884727   | 9.35E-17    | 4.63E-16    |

---

|                   |              |             |             |
|-------------------|--------------|-------------|-------------|
| gene-Led03718-sp3 | 2.425264114  | 5.75E-27    | 4.91E-26    |
| gene-Led01300-sp3 | 3.919298363  | 1.16E-50    | 2.63E-49    |
| gene-Led02914-sp3 | 1.971617972  | 1.19E-16    | 5.85E-16    |
| gene-Led05052-sp3 | 2.247858638  | 3.38E-11    | 1.18E-10    |
| gene-Led01965-sp3 | 2.686749266  | 2.12E-40    | 3.27E-39    |
| gene-Led05541-sp3 | 1.052536478  | 6.13E-10    | 1.96E-09    |
| gene-Led10637-sp3 | 2.457565589  | 9.08E-32    | 9.65E-31    |
| gene-Led01050-sp3 | 0.446226012  | 0.000373702 | 0.000691355 |
| gene-Led09407-sp3 | 0.883193697  | 6.48E-06    | 1.44E-05    |
| gene-Led00581-sp3 | 0.903097756  | 6.66E-09    | 1.95E-08    |
| gene-Led10998-sp3 | -1.033290175 | 5.40E-06    | 1.21E-05    |
| gene-Led00655-sp3 | -1.03935504  | 1.58E-07    | 4.06E-07    |
| gene-Led07527-sp3 | 2.954799708  | 4.77E-62    | 1.60E-60    |
| gene-Led10059-sp3 | 0.380748744  | 0.025831046 | 0.037219365 |
| gene-Led07583-sp3 | 1.665561096  | 5.22E-20    | 3.12E-19    |
| gene-Led02526-sp3 | 4.880868147  | 8.20E-86    | 6.15E-84    |
| gene-Led03264-sp3 | 4.857196902  | 7.56E-38    | 1.04E-36    |
| gene-Led07315-sp3 | 2.650379235  | 2.85E-24    | 2.13E-23    |
| gene-Led05204-sp3 | 2.758258998  | 6.53E-10    | 2.08E-09    |
| gene-Led07608-sp3 | 1.821708617  | 1.72E-36    | 2.26E-35    |
| gene-Led03654-sp3 | 4.426263111  | 6.01E-50    | 1.35E-48    |
| gene-Led01117-sp3 | -2.419943653 | 1.23E-19    | 7.19E-19    |
| gene-Led06932-sp3 | 1.682348593  | 4.15E-41    | 6.56E-40    |
| gene-Led09887-sp3 | 5.272869511  | 1.47E-52    | 3.51E-51    |
| gene-Led00177-sp3 | 2.124965422  | 4.00E-09    | 1.19E-08    |
| gene-Led09653-sp3 | 2.666121071  | 4.50E-46    | 8.71E-45    |
| gene-Led04938-sp3 | 6.392409857  | 2.27E-102   | 2.33E-100   |
| gene-Led04692-sp3 | 3.533326482  | 7.71E-30    | 7.51E-29    |
| gene-Led07357-sp3 | 4.568654037  | 8.04E-37    | 1.06E-35    |
| gene-Led06145-sp3 | -2.895768299 | 3.51E-17    | 1.78E-16    |
| gene-Led02240-sp3 | -2.111215086 | 7.81E-42    | 1.27E-40    |
| gene-Led01182-sp3 | 2.067086612  | 2.04E-29    | 1.94E-28    |
| gene-Led07993-sp3 | 1.211399206  | 1.52E-15    | 7.00E-15    |
| gene-Led08984-sp3 | 1.6799919    | 5.68E-14    | 2.40E-13    |
| gene-Led10158-sp3 | 1.052719206  | 2.86E-10    | 9.35E-10    |
| gene-Led09959-sp3 | 4.826021274  | 2.85E-38    | 4.00E-37    |
| gene-Led01440-sp3 | 1.887902684  | 2.20E-07    | 5.58E-07    |
| gene-Led06162-sp3 | 4.051097061  | 6.45E-33    | 7.22E-32    |
| gene-Led08611-sp3 | 3.073385075  | 2.61E-109   | 3.08E-107   |
| gene-Led06491-sp3 | 2.678896515  | 4.74E-17    | 2.39E-16    |
| gene-Led09124-sp3 | 1.647443996  | 1.47E-20    | 9.04E-20    |
| gene-Led07923-sp3 | 3.066508681  | 2.41E-53    | 5.91E-52    |

---

|                   |              |           |           |
|-------------------|--------------|-----------|-----------|
| gene-Led02628-sp3 | 1.509462385  | 2.41E-08  | 6.71E-08  |
| gene-Led01004-sp3 | 2.563196679  | 2.89E-16  | 1.40E-15  |
| gene-Led10625-sp3 | 1.52150231   | 1.26E-12  | 4.86E-12  |
| gene-Led02386-sp3 | 1.642014196  | 2.79E-26  | 2.31E-25  |
| gene-Led07171-sp3 | 4.865122112  | 1.26E-239 | 1.41E-236 |
| gene-Led08404-sp3 | 2.561882784  | 1.55E-30  | 1.57E-29  |
| gene-Led06793-sp3 | 3.986728061  | 1.03E-24  | 7.87E-24  |
| gene-Led10130-sp3 | 2.124755073  | 4.90E-15  | 2.20E-14  |
| gene-Led09401-sp3 | 2.386517311  | 9.57E-14  | 3.98E-13  |
| gene-Led10302-sp3 | 1.02954737   | 3.53E-13  | 1.42E-12  |
| gene-Led06129-sp3 | 1.818068537  | 2.34E-13  | 9.52E-13  |
| gene-Led02368-sp3 | 3.613307856  | 3.14E-54  | 7.94E-53  |
| gene-Led03791-sp3 | 2.661461168  | 4.16E-49  | 9.02E-48  |
| gene-Led10458-sp3 | 3.168129031  | 1.64E-12  | 6.30E-12  |
| gene-Led02110-sp3 | 2.931771401  | 1.37E-32  | 1.52E-31  |
| gene-Led10160-sp3 | 1.16506317   | 3.88E-06  | 8.81E-06  |
| gene-Led02054-sp3 | 5.282255221  | 2.06E-16  | 1.00E-15  |
| gene-Led05311-sp3 | 1.743469402  | 5.24E-29  | 4.88E-28  |
| gene-Led07906-sp3 | -0.697656895 | 3.35E-08  | 9.18E-08  |
| gene-Led09666-sp3 | -1.410544979 | 2.92E-10  | 9.56E-10  |
| gene-Led04292-sp3 | -0.934402672 | 5.09E-10  | 1.64E-09  |
| gene-Led06024-sp3 | 4.132398954  | 1.53E-42  | 2.55E-41  |
| gene-Led01122-sp3 | 2.192079126  | 1.90E-75  | 1.07E-73  |
| gene-Led02124-sp3 | 1.229114257  | 1.02E-09  | 3.21E-09  |
| gene-Led06015-sp3 | 2.274842652  | 1.38E-30  | 1.40E-29  |
| gene-Led08476-sp3 | 1.449157764  | 2.11E-10  | 6.96E-10  |
| gene-Led09647-sp3 | 3.068929913  | 1.08E-34  | 1.31E-33  |
| gene-Led05929-sp3 | 1.051926532  | 1.80E-20  | 1.10E-19  |
| gene-Led01835-sp3 | 1.239655653  | 8.26E-15  | 3.67E-14  |
| gene-Led07277-sp3 | 2.521428062  | 1.48E-18  | 8.13E-18  |
| gene-Led08310-sp3 | 2.854776316  | 1.80E-17  | 9.30E-17  |
| gene-Led03385-sp3 | 3.619161593  | 3.31E-21  | 2.12E-20  |
| gene-Led10175-sp3 | 5.228098359  | 1.46E-77  | 8.67E-76  |
| gene-Led01195-sp3 | 2.194691082  | 1.86E-38  | 2.63E-37  |
| gene-Led01936-sp3 | 4.808841824  | 1.03E-109 | 1.24E-107 |
| gene-Led05996-sp3 | 4.530042835  | 7.95E-54  | 1.98E-52  |
| gene-Led01286-sp3 | 3.01183629   | 1.06E-103 | 1.12E-101 |
| gene-Led04784-sp3 | 4.974089807  | 1.72E-23  | 1.24E-22  |
| gene-Led04501-sp3 | 1.550854752  | 2.36E-26  | 1.96E-25  |
| gene-Led07298-sp3 | 6.177495682  | 3.54E-93  | 3.07E-91  |
| gene-Led03051-sp3 | 2.385482688  | 5.43E-39  | 7.86E-38  |
| gene-Led10353-sp3 | 2.190677902  | 1.45E-65  | 5.65E-64  |

---

|                   |              |             |             |
|-------------------|--------------|-------------|-------------|
| gene-Led04192-sp3 | 1.780575138  | 5.42E-09    | 1.60E-08    |
| gene-Led03617-sp3 | 1.793013873  | 8.30E-05    | 0.000164035 |
| gene-Led05150-sp3 | 2.384231833  | 2.49E-11    | 8.79E-11    |
| gene-Led10214-sp3 | 2.55783351   | 1.56E-16    | 7.64E-16    |
| gene-Led01851-sp3 | 3.542024221  | 6.34E-58    | 1.84E-56    |
| gene-Led04410-sp3 | -0.807855252 | 1.69E-08    | 4.77E-08    |
| gene-Led02364-sp3 | 2.729021892  | 1.00E-33    | 1.16E-32    |
| gene-Led00385-sp3 | 1.53919118   | 6.77E-15    | 3.03E-14    |
| gene-Led04988-sp3 | -0.538491493 | 0.00510914  | 0.008214008 |
| gene-Led01575-sp3 | 1.606242199  | 7.42E-13    | 2.91E-12    |
| gene-Led01633-sp3 | 2.02634907   | 1.12E-17    | 5.82E-17    |
| gene-Led08101-sp3 | 2.498780923  | 1.79E-15    | 8.24E-15    |
| gene-Led04470-sp3 | 2.226981725  | 4.74E-14    | 2.02E-13    |
| gene-Led09888-sp3 | 1.206102688  | 0.004194681 | 0.006817968 |
| gene-Led00829-sp3 | 0.576349045  | 0.003159454 | 0.005228312 |
| gene-Led01878-sp3 | 0.414363889  | 0.020936931 | 0.030664185 |
| gene-Led05281-sp3 | 1.859140181  | 5.01E-09    | 1.48E-08    |
| gene-Led10825-sp3 | 1.602986344  | 8.21E-05    | 0.000162253 |
| gene-Led08270-sp3 | 2.499846116  | 3.46E-21    | 2.22E-20    |
| gene-Led02186-sp3 | 0.634034742  | 0.003943147 | 0.006436183 |
| gene-Led07304-sp3 | 1.765654154  | 3.64E-29    | 3.42E-28    |
| gene-Led10917-sp3 | 3.031822326  | 1.89E-28    | 1.72E-27    |
| gene-Led10032-sp3 | 1.857424366  | 3.34E-09    | 1.00E-08    |
| gene-Led00378-sp3 | 0.990510276  | 0.014245947 | 0.021471439 |
| gene-Led11368-sp3 | 1.582868808  | 2.20E-09    | 6.67E-09    |
| gene-Led01199-sp3 | -0.72863972  | 0.000677212 | 0.001219856 |
| gene-Led01475-sp3 | 1.536638373  | 3.47E-15    | 1.58E-14    |
| gene-Led09648-sp3 | 0.915609636  | 8.81E-06    | 1.92E-05    |
| gene-Led10811-sp3 | 2.596505599  | 5.73E-44    | 1.02E-42    |
| gene-Led00087-sp3 | -0.502788239 | 0.005872989 | 0.009373101 |
| gene-Led00930-sp3 | -1.042714035 | 1.73E-14    | 7.57E-14    |
| gene-Led09302-sp3 | 1.542792109  | 5.92E-07    | 1.44E-06    |
| gene-Led03000-sp3 | -0.860631088 | 8.51E-06    | 1.86E-05    |
| gene-Led06719-sp3 | -0.909249264 | 1.37E-08    | 3.92E-08    |
| gene-Led01774-sp3 | -0.657762728 | 1.41E-06    | 3.30E-06    |
| gene-Led07294-sp3 | 1.375211252  | 1.26E-05    | 2.70E-05    |
| gene-Led06058-sp3 | 2.53436606   | 8.90E-21    | 5.56E-20    |
| gene-Led08433-sp3 | -0.720113338 | 8.34E-05    | 0.000164803 |
| gene-Led06030-sp3 | 2.399745782  | 2.89E-11    | 1.02E-10    |
| gene-Led08499-sp3 | -0.934276382 | 1.42E-08    | 4.06E-08    |
| gene-Led09343-sp3 | -2.247816231 | 4.09E-30    | 4.04E-29    |
| gene-Led07793-sp3 | -1.432565236 | 3.37E-17    | 1.72E-16    |



---

|                   |              |             |             |
|-------------------|--------------|-------------|-------------|
| gene-Led01885-sp3 | 1.552629406  | 1.89E-18    | 1.03E-17    |
| gene-Led09548-sp3 | 1.888768057  | 6.13E-07    | 1.49E-06    |
| gene-Led02233-sp3 | -0.679015482 | 2.22E-05    | 4.66E-05    |
| gene-Led06739-sp3 | 2.223038388  | 5.92E-33    | 6.64E-32    |
| gene-Led01447-sp3 | 1.981333974  | 3.61E-22    | 2.43E-21    |
| gene-Led07211-sp3 | 1.287538417  | 1.01E-12    | 3.92E-12    |
| gene-Led08319-sp3 | 4.870501678  | 8.01E-64    | 2.93E-62    |
| gene-Led05836-sp3 | 3.102847421  | 1.42E-05    | 3.03E-05    |
| gene-Led06003-sp3 | 3.872046826  | 7.29E-34    | 8.52E-33    |
| gene-Led07367-sp3 | 1.64484273   | 3.07E-09    | 9.21E-09    |
| gene-Led01819-sp3 | 5.86159612   | 5.35E-19    | 3.02E-18    |
| gene-Led08079-sp3 | 0.93208633   | 3.25E-08    | 8.92E-08    |
| gene-Led00700-sp3 | 0.921933382  | 1.39E-07    | 3.61E-07    |
| gene-Led06168-sp3 | 1.112103195  | 1.31E-07    | 3.39E-07    |
| gene-Led04233-sp3 | 2.023579897  | 8.90E-27    | 7.56E-26    |
| gene-Led02004-sp3 | 1.19111406   | 2.35E-14    | 1.02E-13    |
| gene-Led10666-sp3 | 1.116099261  | 6.76E-07    | 1.63E-06    |
| gene-Led10105-sp3 | -0.535824288 | 0.000753723 | 0.001347773 |
| gene-Led10676-sp3 | 2.660830438  | 5.87E-14    | 2.48E-13    |
| gene-Led05648-sp3 | -1.100616717 | 1.03E-11    | 3.73E-11    |
| gene-Led10355-sp3 | 1.096522045  | 2.39E-10    | 7.87E-10    |
| gene-Led08265-sp3 | 1.547094395  | 1.18E-11    | 4.27E-11    |
| gene-Led06825-sp3 | 1.321821957  | 1.51E-17    | 7.83E-17    |
| gene-Led01954-sp3 | 1.319425191  | 6.92E-10    | 2.20E-09    |
| gene-Led10009-sp3 | -0.345567947 | 0.018377888 | 0.027181538 |
| gene-Led00048-sp3 | 0.662082682  | 2.76E-05    | 5.73E-05    |
| gene-Led05781-sp3 | 1.089584574  | 2.07E-08    | 5.79E-08    |
| gene-Led01588-sp3 | 1.066148299  | 1.09E-12    | 4.23E-12    |
| gene-Led01088-sp3 | 1.348592362  | 3.23E-06    | 7.36E-06    |
| gene-Led01317-sp3 | 2.324764196  | 6.33E-19    | 3.55E-18    |
| gene-Led00767-sp3 | -1.398449057 | 5.40E-18    | 2.86E-17    |
| gene-Led00939-sp3 | 0.801124846  | 3.38E-08    | 9.26E-08    |
| gene-Led03934-sp3 | 1.709656995  | 9.94E-14    | 4.13E-13    |
| gene-Led08201-sp3 | -0.851752146 | 1.14E-08    | 3.27E-08    |
| gene-Led09892-sp3 | 0.985122428  | 6.18E-08    | 1.65E-07    |
| gene-Led05887-sp3 | 3.319953357  | 1.94E-38    | 2.75E-37    |
| gene-Led04927-sp3 | 4.087718229  | 3.64E-27    | 3.15E-26    |
| gene-Led02197-sp3 | 0.32243314   | 0.017618065 | 0.026134633 |
| gene-Led05028-sp3 | 0.81115679   | 0.004744353 | 0.007658153 |
| gene-Led04475-sp3 | 5.348287896  | 2.59E-12    | 9.80E-12    |
| gene-Led05357-sp3 | -0.597249933 | 0.025102123 | 0.036236594 |
| gene-Led10240-sp3 | 1.451649254  | 1.53E-08    | 4.36E-08    |

---

|                   |              |             |             |
|-------------------|--------------|-------------|-------------|
| gene-Led06521-sp3 | -0.632089936 | 4.62E-05    | 9.39E-05    |
| gene-Led08078-sp3 | 1.483063061  | 2.58E-13    | 1.05E-12    |
| gene-Led00534-sp3 | 1.707388684  | 5.06E-12    | 1.87E-11    |
| gene-Led08312-sp3 | 0.760347439  | 0.004775408 | 0.007705806 |
| gene-Led07101-sp3 | -0.423756212 | 0.011544724 | 0.017662321 |
| gene-Led04835-sp3 | 2.322593505  | 6.40E-22    | 4.27E-21    |
| gene-Led04633-sp3 | -0.648219717 | 0.000421295 | 0.00077555  |
| gene-Led03194-sp3 | 1.016407873  | 1.87E-07    | 4.79E-07    |
| gene-Led10348-sp3 | 0.930643784  | 1.39E-08    | 3.97E-08    |
| gene-Led05143-sp3 | -0.463808563 | 0.002043327 | 0.003464008 |
| gene-Led09620-sp3 | 1.663100823  | 0.013989842 | 0.021111588 |
| gene-Led06037-sp3 | 0.730653307  | 5.73E-05    | 0.000115368 |
| gene-Led04339-sp3 | -0.645023762 | 0.000784167 | 0.001399722 |
| gene-Led02851-sp3 | -0.825095764 | 1.07E-08    | 3.08E-08    |
| gene-Led06061-sp3 | 0.740778771  | 2.42E-05    | 5.05E-05    |
| gene-Led04041-sp3 | -0.388111213 | 0.01340684  | 0.020313333 |
| gene-Led10354-sp3 | 0.42539637   | 0.016297158 | 0.024331229 |
| gene-Led02889-sp3 | 0.74707634   | 7.15E-05    | 0.000142458 |
| gene-Led10756-sp3 | -0.309980823 | 0.017136635 | 0.02547952  |
| gene-Led02772-sp3 | 0.454073363  | 0.000737922 | 0.001321635 |
| gene-Led11004-sp3 | 0.617532611  | 0.01240746  | 0.018913146 |
| gene-Led00537-sp3 | 1.168918056  | 7.53E-08    | 2.00E-07    |
| gene-Led05225-sp3 | 0.480099311  | 0.004310683 | 0.006997464 |
| gene-Led02557-sp3 | -0.430674621 | 0.008397177 | 0.013096001 |
| gene-Led05621-sp3 | 0.391694446  | 0.011861967 | 0.018121141 |
| gene-Led02394-sp3 | 0.340879056  | 0.020492248 | 0.030064157 |
| gene-Led09429-sp3 | 1.051655037  | 3.51E-07    | 8.73E-07    |
| gene-Led05064-sp3 | 1.715143944  | 2.01E-06    | 4.67E-06    |
| gene-Led06409-sp3 | 1.690106863  | 2.55E-26    | 2.12E-25    |
| gene-Led01798-sp3 | -0.733812657 | 0.000237443 | 0.000448688 |
| gene-Led03596-sp3 | 0.956912804  | 3.99E-09    | 1.19E-08    |
| gene-Led06040-sp3 | -0.405968439 | 0.015997724 | 0.02391096  |
| gene-Led03630-sp3 | -0.334669655 | 0.025458167 | 0.036718931 |
| gene-Led05660-sp3 | -1.043288487 | 5.41E-11    | 1.87E-10    |
| gene-Led00513-sp3 | -0.896721124 | 2.68E-09    | 8.09E-09    |
| gene-Led08658-sp3 | -3.730892894 | 3.45E-09    | 1.03E-08    |
| gene-Led02631-sp3 | -0.815553247 | 0.002936854 | 0.00489054  |
| gene-Led00159-sp3 | -0.586419348 | 5.77E-06    | 1.29E-05    |
| gene-Led09335-sp3 | 0.659475473  | 1.87E-06    | 4.35E-06    |
| gene-Led03071-sp3 | -0.658227375 | 0.0047051   | 0.007602116 |
| gene-Led09954-sp3 | -0.619447608 | 2.60E-06    | 5.97E-06    |
| gene-Led05013-sp3 | -0.375991762 | 0.003477982 | 0.005718703 |

---

|                   |              |             |             |
|-------------------|--------------|-------------|-------------|
| gene-Led07201-sp3 | -1.117994811 | 2.94E-06    | 6.71E-06    |
| gene-Led05663-sp3 | -0.876630004 | 9.04E-09    | 2.62E-08    |
| gene-Led01944-sp3 | 0.666917771  | 0.017112643 | 0.02546207  |
| gene-Led08644-sp3 | -0.634331165 | 0.001881763 | 0.003203618 |
| gene-Led04116-sp3 | 0.573398516  | 0.001069001 | 0.001877476 |
| gene-Led10774-sp3 | -0.726091077 | 0.000385985 | 0.00071316  |
| gene-Led09293-sp3 | -0.944000633 | 0.00482381  | 0.007780165 |
| gene-Led02515-sp3 | -0.589471529 | 0.007543674 | 0.011867503 |
| gene-Led08891-sp3 | 0.994079432  | 8.06E-07    | 1.94E-06    |
| gene-Led05524-sp3 | -0.661165476 | 0.000450916 | 0.000827503 |
| gene-Led02482-sp3 | 0.612169152  | 0.00725957  | 0.011449711 |
| gene-Led00881-sp3 | -0.329228695 | 0.033854256 | 0.04784448  |
| gene-Led07855-sp3 | -0.665801767 | 2.87E-07    | 7.20E-07    |
| gene-Led08876-sp3 | 0.337922121  | 0.007613607 | 0.011963049 |
| gene-Led08978-sp3 | 0.76090869   | 3.87E-05    | 7.93E-05    |
| gene-Led08920-sp3 | 0.542336897  | 0.002215608 | 0.00373842  |
| gene-Led02569-sp3 | -1.25317367  | 1.10E-22    | 7.60E-22    |
| gene-Led00588-sp3 | 0.559326589  | 0.005296151 | 0.008499714 |
| gene-Led06737-sp3 | -0.365076336 | 0.024531811 | 0.035464235 |
| gene-Led02963-sp3 | -0.622209923 | 0.002310913 | 0.003891391 |
| gene-Led10645-sp3 | 0.573760154  | 0.003792852 | 0.006202952 |
| gene-Led10188-sp3 | 0.869839845  | 4.35E-07    | 1.07E-06    |
| gene-Led06663-sp3 | -1.015549768 | 5.87E-05    | 0.000117962 |
| gene-Led03372-sp3 | -0.562896618 | 7.49E-06    | 1.65E-05    |
| gene-Led04279-sp3 | 0.703654522  | 0.003130853 | 0.005186958 |
| gene-Led06597-sp3 | -0.377227001 | 0.016780393 | 0.024987896 |
| gene-Led02388-sp3 | 0.597843565  | 9.05E-05    | 0.000178102 |
| gene-Led08729-sp3 | 0.806208445  | 2.31E-07    | 5.84E-07    |
| gene-Led09551-sp3 | 2.622041483  | 1.75E-07    | 4.49E-07    |
| gene-Led02085-sp3 | -0.526171951 | 0.001588279 | 0.002735007 |
| gene-Led02762-sp3 | -1.577894112 | 0.001752814 | 0.002999837 |
| gene-Led01777-sp3 | 0.903866061  | 5.02E-06    | 1.13E-05    |
| gene-Led04552-sp3 | -0.662199967 | 0.00012481  | 0.000242317 |
| gene-Led01541-sp3 | -0.654027723 | 0.029394302 | 0.041980526 |
| gene-Led09314-sp3 | 0.49854539   | 0.004171354 | 0.006783342 |
| gene-Led10597-sp3 | 0.83909103   | 0.000828322 | 0.001474087 |
| gene-Led08488-sp3 | -0.535131745 | 0.003257175 | 0.005375863 |
| gene-Led00891-sp3 | -0.493182581 | 0.007502733 | 0.011812838 |
| gene-Led07454-sp3 | -0.352805157 | 0.006171609 | 0.009813854 |
| gene-Led03763-sp3 | -0.646511227 | 0.000873159 | 0.001550312 |
| gene-Led04771-sp3 | 0.961627345  | 0.004068636 | 0.006627025 |
| gene-Led04184-sp3 | -0.508640081 | 0.023606723 | 0.034225322 |

---

|                   |              |             |             |
|-------------------|--------------|-------------|-------------|
| gene-Led00790-sp3 | 0.800634875  | 8.93E-09    | 2.59E-08    |
| gene-Led05214-sp3 | -0.448377242 | 0.003052549 | 0.005066415 |
| gene-Led00864-sp3 | 0.616953232  | 0.028640621 | 0.040997318 |
| gene-Led11123-sp3 | 1.384889447  | 1.08E-16    | 5.35E-16    |
| gene-Led06515-sp3 | -0.270861399 | 0.018026008 | 0.02668465  |
| gene-Led05960-sp3 | -1.111878337 | 0.000264757 | 0.000497217 |
| gene-Led11098-sp3 | -1.80215842  | 5.74E-19    | 3.23E-18    |
| gene-Led05088-sp3 | -0.65450354  | 0.001614581 | 0.002776968 |
| gene-Led01658-sp3 | 0.588009445  | 0.000279206 | 0.00052357  |
| gene-Led02088-sp3 | -0.64932746  | 3.89E-06    | 8.82E-06    |
| gene-Led05628-sp3 | -1.002262192 | 4.73E-10    | 1.52E-09    |
| gene-Led03499-sp3 | 1.060811965  | 1.33E-09    | 4.10E-09    |
| gene-Led06594-sp3 | -0.814270459 | 9.48E-06    | 2.06E-05    |
| gene-Led05358-sp3 | 0.85081649   | 4.59E-07    | 1.13E-06    |
| gene-Led07760-sp3 | -0.719279654 | 3.31E-07    | 8.28E-07    |
| gene-Led00912-sp3 | 0.778849891  | 0.000743184 | 0.001330347 |
| gene-Led02986-sp3 | 0.4592942    | 0.012794322 | 0.019455653 |
| gene-Led01872-sp3 | 1.702280944  | 1.70E-18    | 9.31E-18    |
| gene-Led01383-sp3 | 0.865087408  | 1.33E-05    | 2.83E-05    |
| gene-Led07514-sp3 | 0.524920322  | 0.001537695 | 0.002652901 |
| gene-Led02809-sp3 | -0.44409907  | 0.000383012 | 0.000707797 |
| gene-Led09017-sp3 | -0.392373676 | 0.011762222 | 0.017975923 |
| gene-Led02758-sp3 | 1.446377277  | 4.76E-07    | 1.17E-06    |
| gene-Led06130-sp3 | 1.008949438  | 0.002905619 | 0.004842538 |
| gene-Led07440-sp3 | 0.483988515  | 0.006555524 | 0.010399665 |
| gene-Led10929-sp3 | -0.663788475 | 0.000522383 | 0.000952052 |
| gene-Led03049-sp3 | 1.020401409  | 9.71E-10    | 3.05E-09    |
| gene-Led02195-sp3 | 0.688314529  | 0.000412594 | 0.000760369 |
| gene-Led06775-sp3 | -0.318148617 | 0.017865541 | 0.026466591 |
| gene-Led04155-sp3 | -0.320200476 | 0.007530775 | 0.011851422 |
| gene-Led05163-sp3 | 0.475277657  | 0.000777353 | 0.001388075 |
| gene-Led05616-sp3 | 1.033176993  | 1.88E-06    | 4.37E-06    |
| gene-Led02359-sp3 | 0.662360119  | 1.87E-06    | 4.35E-06    |
| gene-Led02127-sp3 | 0.74048691   | 0.002863623 | 0.004775713 |
| gene-Led08470-sp3 | -0.368438064 | 0.018909695 | 0.027910609 |
| gene-Led03746-sp3 | -0.582184922 | 0.000357843 | 0.000664094 |
| gene-Led02136-sp3 | 0.601724819  | 0.003642956 | 0.005974329 |
| gene-Led10226-sp3 | 0.80224479   | 1.06E-07    | 2.79E-07    |
| gene-Led07491-sp3 | -1.209976063 | 7.62E-10    | 2.41E-09    |
| gene-Led09032-sp3 | 0.384585107  | 0.000974451 | 0.00171983  |
| gene-Led02290-sp3 | -1.559274976 | 0.000272949 | 0.000512218 |
| gene-Led05585-sp3 | 1.185084084  | 3.56E-13    | 1.43E-12    |

---

|                   |              |             |             |
|-------------------|--------------|-------------|-------------|
| gene-Led03124-sp3 | 0.725358402  | 7.23E-06    | 1.59E-05    |
| gene-Led05256-sp3 | -0.954076811 | 6.74E-07    | 1.63E-06    |
| gene-Led03453-sp3 | -1.030120239 | 2.15E-05    | 4.51E-05    |
| gene-Led04450-sp3 | -0.65775514  | 0.016727275 | 0.024912488 |
| gene-Led06881-sp3 | 0.979867041  | 1.95E-09    | 5.95E-09    |
| gene-Led02303-sp3 | -0.432713142 | 0.000452862 | 0.000830771 |
| gene-Led02987-sp3 | -0.711046073 | 2.37E-05    | 4.95E-05    |
| gene-Led10265-sp3 | 2.295692864  | 2.49E-09    | 7.52E-09    |
| gene-Led03716-sp3 | -0.891451733 | 0.028950128 | 0.041393207 |
| gene-Led11162-sp3 | -0.775972136 | 0.000792049 | 0.001412788 |
| gene-Led07986-sp3 | -0.34950209  | 0.029213396 | 0.041734016 |
| gene-Led08645-sp3 | 0.990454286  | 2.25E-07    | 5.70E-07    |
| gene-Led10775-sp3 | -0.475656255 | 0.000433345 | 0.000796419 |
| gene-Led01360-sp3 | 0.853444588  | 0.006815808 | 0.010790444 |
| gene-Led04713-sp3 | 0.742344737  | 0.000502321 | 0.000917317 |
| gene-Led09053-sp3 | 0.381761368  | 0.005489559 | 0.008794667 |
| gene-Led09859-sp3 | 0.53129897   | 0.000166917 | 0.000319622 |
| gene-Led08690-sp3 | 0.87931747   | 3.50E-08    | 9.59E-08    |
| gene-Led08877-sp3 | 1.602977622  | 9.21E-08    | 2.43E-07    |
| gene-Led11274-sp3 | 0.949317693  | 0.007656243 | 0.012018772 |
| gene-Led05640-sp3 | -0.815951056 | 1.31E-09    | 4.06E-09    |
| gene-Led10288-sp3 | -0.431769726 | 0.003752866 | 0.006141553 |
| gene-Led00508-sp3 | 0.579998785  | 9.43E-05    | 0.000185176 |
| gene-Led00970-sp3 | -0.27900532  | 0.012059151 | 0.018410121 |
| gene-Led07893-sp3 | 0.670631321  | 0.000231456 | 0.000438033 |
| gene-Led09675-sp3 | -0.401539399 | 0.015853879 | 0.023710064 |
| gene-Led03970-sp3 | -0.479526767 | 9.63E-05    | 0.00018914  |
| gene-Led05930-sp3 | 0.459942496  | 0.0090021   | 0.013991668 |
| gene-Led07594-sp3 | -0.616256037 | 0.007699164 | 0.01208049  |
| gene-Led07989-sp3 | -0.444937095 | 0.005676932 | 0.009074606 |
| gene-Led00949-sp3 | 0.611126779  | 1.94E-06    | 4.50E-06    |
| gene-Led08137-sp3 | -0.394024752 | 0.015247562 | 0.02286452  |
| gene-Led10485-sp3 | 0.841382465  | 7.66E-07    | 1.84E-06    |
| gene-Led02952-sp3 | -0.539403802 | 0.000893681 | 0.001583674 |
| gene-Led00536-sp3 | 0.722754278  | 7.87E-06    | 1.72E-05    |
| gene-Led00568-sp3 | -0.363398491 | 0.019647411 | 0.028939989 |
| gene-Led09211-sp3 | 0.619062056  | 0.000846592 | 0.001505269 |
| gene-Led00923-sp3 | -0.695949899 | 6.05E-07    | 1.47E-06    |
| gene-Led04242-sp3 | -0.390634389 | 0.000746435 | 0.001335929 |
| gene-Led06602-sp3 | -0.740664502 | 4.46E-05    | 9.09E-05    |
| gene-Led08659-sp3 | -2.48824501  | 0.000177677 | 0.000339128 |
| gene-Led08594-sp3 | 0.423155343  | 0.01766277  | 0.026197082 |

---

|                   |              |             |             |
|-------------------|--------------|-------------|-------------|
| gene-Led05553-sp3 | -0.314675416 | 0.021495333 | 0.031399678 |
| gene-Led08292-sp3 | 0.666723185  | 0.004642    | 0.00750982  |
| gene-Led04504-sp3 | -0.394696985 | 0.024635837 | 0.0356095   |
| gene-Led06255-sp3 | -0.538682463 | 0.00274317  | 0.004586245 |
| gene-Led07058-sp3 | -0.606853652 | 0.003875617 | 0.006331098 |
| gene-Led03600-sp3 | 0.673701263  | 9.79E-05    | 0.000192092 |
| gene-Led06667-sp3 | 1.703306146  | 3.20E-17    | 1.63E-16    |
| gene-Led08814-sp3 | -0.590756786 | 3.44E-05    | 7.08E-05    |
| gene-Led10120-sp3 | -0.734881907 | 0.003198072 | 0.005283519 |
| gene-Led05215-sp3 | -0.695671316 | 0.000517445 | 0.000943394 |
| gene-Led01462-sp3 | 1.51130489   | 2.73E-07    | 6.87E-07    |
| gene-Led10347-sp3 | 1.080696299  | 0.00160113  | 0.002755719 |
| gene-Led10782-sp3 | -0.517400973 | 0.00065512  | 0.001182391 |
| gene-Led02336-sp3 | 0.776418015  | 3.54E-07    | 8.79E-07    |
| gene-Led05727-sp3 | -0.94932277  | 9.56E-10    | 3.00E-09    |
| gene-Led01708-sp3 | -0.557003006 | 0.001517673 | 0.002619706 |
| gene-Led02923-sp3 | 0.550971401  | 0.014347546 | 0.021601899 |
| gene-Led10675-sp3 | -0.730771305 | 0.000105275 | 0.000205959 |
| gene-Led06114-sp3 | 0.654458634  | 1.01E-05    | 2.19E-05    |
| gene-Led03561-sp3 | 0.976780951  | 0.000171047 | 0.00032698  |
| gene-Led00465-sp3 | 0.70799844   | 5.51E-06    | 1.23E-05    |
| gene-Led00895-sp3 | 0.844612856  | 1.75E-07    | 4.51E-07    |
| gene-Led06001-sp3 | 0.645164573  | 0.000401478 | 0.000740834 |
| gene-Led02955-sp3 | 0.578400068  | 0.010805624 | 0.016599777 |
| gene-Led05179-sp3 | -0.444148698 | 0.018598669 | 0.027465927 |
| gene-Led07830-sp3 | -0.847270828 | 5.93E-07    | 1.44E-06    |
| gene-Led06495-sp3 | -0.563903553 | 6.29E-06    | 1.40E-05    |
| gene-Led01737-sp3 | -0.417715292 | 0.012853342 | 0.019533582 |
| gene-Led02313-sp3 | -0.951364488 | 0.001353922 | 0.002351585 |
| gene-Led10306-sp3 | 1.59627981   | 1.84E-12    | 7.03E-12    |
| gene-Led06520-sp3 | 0.769512492  | 0.000115735 | 0.000225525 |
| gene-Led02392-sp3 | 0.478358348  | 0.002479567 | 0.004160061 |
| gene-Led07616-sp3 | -0.428822895 | 0.000595141 | 0.001078204 |
| gene-Led09934-sp3 | -0.936656125 | 5.62E-06    | 1.25E-05    |
| gene-Led00916-sp3 | -0.296763727 | 0.022254119 | 0.032418585 |
| gene-Led05500-sp3 | -0.756235163 | 3.26E-05    | 6.72E-05    |
| gene-Led07720-sp3 | 0.544807386  | 0.000459649 | 0.000842761 |
| gene-Led00303-sp3 | 0.514971331  | 0.020346712 | 0.029882468 |
| gene-Led10293-sp3 | 0.892899341  | 0.001161624 | 0.002031983 |
| gene-Led05642-sp3 | -0.513550947 | 0.001288462 | 0.002240601 |
| gene-Led06092-sp3 | 0.62423447   | 0.00176802  | 0.003023286 |
| gene-Led00975-sp3 | -1.099459573 | 0.00050849  | 0.000928246 |

---

|                   |              |             |             |
|-------------------|--------------|-------------|-------------|
| gene-Led02069-sp3 | 1.779147584  | 1.42E-09    | 4.39E-09    |
| gene-Led03128-sp3 | 0.734708296  | 1.31E-08    | 3.77E-08    |
| gene-Led02271-sp3 | -1.053628709 | 5.16E-16    | 2.46E-15    |
| gene-Led10264-sp3 | 0.702378501  | 0.01179845  | 0.018028549 |
| gene-Led02182-sp3 | -0.548630617 | 0.000545783 | 0.000992359 |
| gene-Led05680-sp3 | -0.62597148  | 7.97E-05    | 0.000157701 |
| gene-Led09267-sp3 | -0.673345974 | 0.000203449 | 0.000386484 |
| gene-Led10083-sp3 | -0.479539848 | 0.025720646 | 0.037081551 |
| gene-Led04812-sp3 | 0.644008294  | 0.00103736  | 0.001823816 |
| gene-Led00892-sp3 | 0.688129559  | 0.000910264 | 0.001610788 |
| gene-Led00779-sp3 | 0.356255825  | 0.017007461 | 0.025318527 |
| gene-Led02697-sp3 | -0.398238911 | 0.007124336 | 0.011254078 |

---

| Table S7 The top 40 enriched KEGG terms of DEGs in blue and yellow modle |                                                     |           |            |          |          |            |                                                                                                                                                                                                                                                               |                                                                              |
|--------------------------------------------------------------------------|-----------------------------------------------------|-----------|------------|----------|----------|------------|---------------------------------------------------------------------------------------------------------------------------------------------------------------------------------------------------------------------------------------------------------------|------------------------------------------------------------------------------|
| KEGG_A_ class                                                            | Pathway                                             | out (228) | All (2063) | Pvalue   | Qvalue   | Pathway ID | Genes                                                                                                                                                                                                                                                         | K_IDs                                                                        |
| Metabolism                                                               | Phenylalanine, tyrosine and tryptophan biosynthesis | 11        | 21         | 3.08E-06 | 0.000317 | ko00400    | bluegene-Led00242-sp3;bluegene-Led02135-sp3;bluegene-Led07116-sp3;bluegene-Led00717-sp3;bluegene-Led05523-sp3;yellowgene-Led05170-sp3;yellowgene-Led11273-sp3;yellowgene-Led02036-sp3;yellowgene-Led01633-sp3;yellowgene-Led10676-sp3;yellowgene-Led05640-sp3 | K01694;K01736;K00817;K01657;K00211;K13501;K00766;K00766;K13830;K01626;K13501 |



|            |                    |     |     |           |           |         |                                                                                                                                                                                                                                                                                                                                                                                                                                                                                                                                                                                                                                                                                                                                                                                                                                                                                                                                                                                                                                                                                                                                                                                                                                                                                                                                                                                                                                                                                                                                                                                                                                              |                                                                                                                                                                                                                                                                                                                                                                                                                                                                                                                                                                                                                                                                                                                                                                                                                                                                                                                   |
|------------|--------------------|-----|-----|-----------|-----------|---------|----------------------------------------------------------------------------------------------------------------------------------------------------------------------------------------------------------------------------------------------------------------------------------------------------------------------------------------------------------------------------------------------------------------------------------------------------------------------------------------------------------------------------------------------------------------------------------------------------------------------------------------------------------------------------------------------------------------------------------------------------------------------------------------------------------------------------------------------------------------------------------------------------------------------------------------------------------------------------------------------------------------------------------------------------------------------------------------------------------------------------------------------------------------------------------------------------------------------------------------------------------------------------------------------------------------------------------------------------------------------------------------------------------------------------------------------------------------------------------------------------------------------------------------------------------------------------------------------------------------------------------------------|-------------------------------------------------------------------------------------------------------------------------------------------------------------------------------------------------------------------------------------------------------------------------------------------------------------------------------------------------------------------------------------------------------------------------------------------------------------------------------------------------------------------------------------------------------------------------------------------------------------------------------------------------------------------------------------------------------------------------------------------------------------------------------------------------------------------------------------------------------------------------------------------------------------------|
| Metabolism | Metabolic pathways | 126 | 933 | 0.0008138 | 0.0419097 | ko01100 | bluegene-Led04826-sp3;bluegene-Led07043-sp3;bluegene-Led07148-sp3;bluegene-Led03563-sp3;bluegene-Led09414-sp3;bluegene-Led08115-sp3;bluegene-Led02291-sp3;bluegene-Led04609-sp3;bluegene-Led00416-sp3;bluegene-Led01865-sp3;bluegene-Led01020-sp3;bluegene-Led05720-sp3;bluegene-Led05184-sp3;bluegene-Led07502-sp3;bluegene-Led09363-sp3;bluegene-Led01439-sp3;bluegene-Led10636-sp3;bluegene-Led09381-sp3;bluegene-Led08479-sp3;bluegene-Led00283-sp3;bluegene-Led06506-sp3;bluegene-Led05131-sp3;bluegene-Led02284-sp3;bluegene-Led06378-sp3;bluegene-Led00805-sp3;bluegene-Led00242-sp3;bluegene-Led06651-sp3;bluegene-Led06571-sp3;bluegene-Led05522-sp3;bluegene-Led02641-sp3;bluegene-Led10332-sp3;bluegene-Led02321-sp3;bluegene-Led11358-sp3;bluegene-Led05186-sp3;bluegene-Led09307-sp3;bluegene-Led06223-sp3;bluegene-Led00741-sp3;bluegene-Led00871-sp3;bluegene-Led05872-sp3;bluegene-Led03564-sp3;bluegene-Led04605-sp3;bluegene-Led03479-sp3;bluegene-Led09684-sp3;bluegene-Led03549-sp3;bluegene-Led03998-sp3;bluegene-Led07015-sp3;bluegene-Led03809-sp3;bluegene-Led06807-sp3;bluegene-Led07154-sp3;bluegene-Led02612-sp3;bluegene-Led09673-sp3;bluegene-Led02084-sp3;bluegene-Led07542-sp3;bluegene-Led06683-sp3;bluegene-Led09268-sp3;bluegene-Led07169-sp3;bluegene-Led00924-sp3;bluegene-Led10653-sp3;bluegene-Led03727-sp3;bluegene-Led04307-sp3;bluegene-Led09884-sp3;bluegene-Led00681-sp3;bluegene-Led00108-sp3;bluegene-Led09138-sp3;bluegene-Led04105-sp3;bluegene-Led08024-sp3;bluegene-Led05927-sp3;bluegene-Led01468-sp3;bluegene-Led00254-sp3;bluegene-Led04488-sp3;bluegene-Led05570-sp3;bluegene-Led05901- | K00459;K17818;K00008;K00128;K01613;K01886;K00480;K00101;K06966;K20247;K01455;K01183;K01178;K03948;K01950;K01187;K00852;K00254;K01613;K01915;K00480;K00306;K00558;K03146;K05349;K01694;K01178;K01115;K01687;K15634;K01785;K01874;K01613;K02564;K01679;K00480;K01580;K02144;K21196;K00128;K17066;K17066;K01427;K01480;K01514;K01110;K00463;K15371;K01176;K00720;K05349;K01426;K11262;K20246;K07512;K00928;K00020;K00968;K18369;K12350;K01796;K01113;K00480;K00147;K00953;K01915;K01230;K20838;K18083;K01426;K00122;K00737;K07748;K20246;K00102;K07542;K00432;K01736;K00480;K00817;K00318;K01443;K00128;K00065;K01477;K00993;K00799;K01657;K00029;K00211;K00757;K01176;K01649;K13501;K18097;K08967;K00766;K05917;K01497;K11426;K01613;K00766;K07511;K01580;K00451;K00621;K00877;K00899;K13830;K00059;K00801;K18551;K01626;K06210;K05857;K01739;K03844;K00698;K08678;K08764;K13501;K00706;K04486;K00698;K00222;K01228 |
|------------|--------------------|-----|-----|-----------|-----------|---------|----------------------------------------------------------------------------------------------------------------------------------------------------------------------------------------------------------------------------------------------------------------------------------------------------------------------------------------------------------------------------------------------------------------------------------------------------------------------------------------------------------------------------------------------------------------------------------------------------------------------------------------------------------------------------------------------------------------------------------------------------------------------------------------------------------------------------------------------------------------------------------------------------------------------------------------------------------------------------------------------------------------------------------------------------------------------------------------------------------------------------------------------------------------------------------------------------------------------------------------------------------------------------------------------------------------------------------------------------------------------------------------------------------------------------------------------------------------------------------------------------------------------------------------------------------------------------------------------------------------------------------------------|-------------------------------------------------------------------------------------------------------------------------------------------------------------------------------------------------------------------------------------------------------------------------------------------------------------------------------------------------------------------------------------------------------------------------------------------------------------------------------------------------------------------------------------------------------------------------------------------------------------------------------------------------------------------------------------------------------------------------------------------------------------------------------------------------------------------------------------------------------------------------------------------------------------------|

---

sp3;bluegene-Led03215-sp3;bluegene-Led05188-  
sp3;bluegene-Led09419-sp3;bluegene-Led11444-  
sp3;bluegene-Led10119-sp3;bluegene-Led02135-  
sp3;bluegene-Led01552-sp3;bluegene-Led07116-  
sp3;bluegene-Led01972-sp3;bluegene-Led05785-  
sp3;bluegene-Led01537-sp3;bluegene-Led07149-  
sp3;bluegene-Led05563-sp3;bluegene-Led03417-  
sp3;bluegene-Led07102-sp3;bluegene-Led00717-  
sp3;bluegene-Led06539-sp3;bluegene-Led05523-  
sp3;bluegene-Led01515-sp3;bluegene-Led01681-  
sp3;bluegene-Led01165-sp3;yellowgene-Led05170-  
sp3;yellowgene-Led05888-sp3;yellowgene-  
Led00071-sp3;yellowgene-Led11273-  
sp3;yellowgene-Led04360-sp3;yellowgene-  
Led08246-sp3;yellowgene-Led08563-  
sp3;yellowgene-Led08569-sp3;yellowgene-  
Led02036-sp3;yellowgene-Led05235-  
sp3;yellowgene-Led06932-sp3;yellowgene-  
Led09653-sp3;yellowgene-Led01182-  
sp3;yellowgene-Led01286-sp3;yellowgene-  
Led02364-sp3;yellowgene-Led01633-  
sp3;yellowgene-Led05281-sp3;yellowgene-  
Led03000-sp3;yellowgene-Led01774-  
sp3;yellowgene-Led10676-sp3;yellowgene-  
Led05781-sp3;yellowgene-Led00534-  
sp3;yellowgene-Led04339-sp3;yellowgene-  
Led05621-sp3;yellowgene-Led05358-  
sp3;yellowgene-Led07514-sp3;yellowgene-  
Led11274-sp3;yellowgene-Led05640-  
sp3;yellowgene-Led00508-sp3;yellowgene-  
Led08594-sp3;yellowgene-Led02336-  
sp3;yellowgene-Led10083-sp3;yellowgene-  
Led00779-sp3

---

---

|            |                                        |   |    |           |           |         |                                                                                                                                                                                   |                                                         |
|------------|----------------------------------------|---|----|-----------|-----------|---------|-----------------------------------------------------------------------------------------------------------------------------------------------------------------------------------|---------------------------------------------------------|
| Metabolism | Steroid biosynthesis                   | 6 | 15 | 0.0036129 | 0.1240413 | ko00100 | bluegene-Led08897-sp3;bluegene-Led03215-sp3;yellowgene-Led04360-sp3;yellowgene-Led03000-sp3;yellowgene-Led05179-sp3;yellowgene-Led10083-sp3                                       | K00637;K07748;K05917;K00801;K01052;K00222               |
| Metabolism | Histidine metabolism                   | 8 | 29 | 0.0107206 | 0.2317661 | ko00340 | bluegene-Led03563-sp3;bluegene-Led01865-sp3;bluegene-Led03564-sp3;bluegene-Led06683-sp3;bluegene-Led05188-sp3;bluegene-Led07116-sp3;bluegene-Led01537-sp3;yellowgene-Led08594-sp3 | K00128;K20247;K00128;K20246;K20246;K00817;K00128;K04486 |
| Metabolism | Phosphonate and phosphinate metabolism | 3 | 5  | 0.0112508 | 0.2317661 | ko00440 | bluegene-Led05872-sp3;bluegene-Led10653-sp3;bluegene-Led03417-sp3                                                                                                                 | K21196;K00968;K00993                                    |
| Metabolism | Nitrogen metabolism                    | 5 | 15 | 0.0186933 | 0.320902  | ko00910 | bluegene-Led04826-sp3;bluegene-Led01020-sp3;bluegene-Led00283-sp3;bluegene-Led06807-sp3;bluegene-Led08024-sp3                                                                     | K00459;K01455;K01915;K15371;K01915                      |

---

---

|            |                                 |    |     |           |           |         |                                                                                                                                                                                                                                                                                                                                                                                                                                                                         |                                                                                                                                             |
|------------|---------------------------------|----|-----|-----------|-----------|---------|-------------------------------------------------------------------------------------------------------------------------------------------------------------------------------------------------------------------------------------------------------------------------------------------------------------------------------------------------------------------------------------------------------------------------------------------------------------------------|---------------------------------------------------------------------------------------------------------------------------------------------|
| Metabolism | Biosynthesis of amino acids     | 20 | 115 | 0.0235361 | 0.346317  | ko01230 | bluegene-Led00283-sp3;bluegene-Led00242-sp3;bluegene-Led05522-sp3;bluegene-Led02641-sp3;bluegene-Led07169-sp3;bluegene-Led09138-sp3;bluegene-Led08024-sp3;bluegene-Led02135-sp3;bluegene-Led07116-sp3;bluegene-Led00717-sp3;bluegene-Led05523-sp3;bluegene-Led01165-sp3;yellowgene-Led05170-sp3;yellowgene-Led11273-sp3;yellowgene-Led02036-sp3;yellowgene-Led01633-sp3;yellowgene-Led10676-sp3;yellowgene-Led04339-sp3;yellowgene-Led05640-sp3;yellowgene-Led08594-sp3 | K01915;K01694;K01687;K15634;K00928;K00147;K01915;K01736;K00817;K01657;K00211;K01649;K13501;K00766;K00766;K13830;K01626;K01739;K13501;K04486 |
| Metabolism | Arginine and proline metabolism | 8  | 35  | 0.0328432 | 0.4228562 | ko00330 | bluegene-Led03563-sp3;bluegene-Led03564-sp3;bluegene-Led03549-sp3;bluegene-Led02084-sp3;bluegene-Led09138-sp3;bluegene-Led04488-sp3;bluegene-Led01972-sp3;bluegene-Led01537-sp3                                                                                                                                                                                                                                                                                         | K00128;K00128;K01480;K01426;K00147;K01426;K00318;K00128                                                                                     |

---

---

|                                      |                                |     |    |           |           |         |                                                                                                                                                                                                                                                                                                                           |                                                                                                   |
|--------------------------------------|--------------------------------|-----|----|-----------|-----------|---------|---------------------------------------------------------------------------------------------------------------------------------------------------------------------------------------------------------------------------------------------------------------------------------------------------------------------------|---------------------------------------------------------------------------------------------------|
| Metabolism                           | beta-Alanine metabolism        | 6   | 24 | 0.0415357 | 0.475353  | ko00410 | bluegene-Led03563-sp3;bluegene-Led00741-sp3;bluegene-Led03564-sp3;bluegene-Led01537-sp3;yellowgene-Led05235-sp3;yellowgene-Led06932-sp3                                                                                                                                                                                   | K00128;K01580;K00128;K00128;K07511;K01580                                                         |
| Cellular Processes                   | Mitophagy yeast                | - 7 | 34 | 0.0732351 | 0.5801491 | ko04139 | bluegene-Led00777-sp3;bluegene-Led03258-sp3;bluegene-Led05903-sp3;bluegene-Led05581-sp3;yellowgene-Led02394-sp3;yellowgene-Led07855-sp3;yellowgene-Led09032-sp3                                                                                                                                                           | K08341;K04441;K11644;K11227;K11644;K03115;K07203                                                  |
| Metabolism                           | Butanoate metabolism           | 4   | 15 | 0.0745412 | 0.5801491 | ko00650 | bluegene-Led00741-sp3;bluegene-Led03727-sp3;yellowgene-Led05235-sp3;yellowgene-Led06932-sp3                                                                                                                                                                                                                               | K01580;K18369;K07511;K01580                                                                       |
| Environmental Information Processing | MAPK signaling pathway - yeast | 14  | 85 | 0.0785848 | 0.5801491 | ko04011 | bluegene-Led03469-sp3;bluegene-Led02165-sp3;bluegene-Led10012-sp3;bluegene-Led03652-sp3;bluegene-Led03258-sp3;bluegene-Led06250-sp3;bluegene-Led05581-sp3;bluegene-Led03820-sp3;bluegene-Led05137-sp3;bluegene-Led02367-sp3;bluegene-Led10528-sp3;yellowgene-Led00508-sp3;yellowgene-Led04242-sp3;yellowgene-Led00465-sp3 | K19860;K19806;K19842;K04371;K04441;K11232;K11227;K04627;K11215;K11246;K04563;K00706;K06666;K11228 |

---

---

|                                |                                               |   |    |           |           |         |                                                                                                                                                                                     |                                                         |
|--------------------------------|-----------------------------------------------|---|----|-----------|-----------|---------|-------------------------------------------------------------------------------------------------------------------------------------------------------------------------------------|---------------------------------------------------------|
| Metabolism                     | Other glycan degradation                      | 3 | 10 | 0.0889718 | 0.5801491 | ko00511 | bluegene-Led08107-sp3;bluegene-Led01656-sp3;yellowgene-Led00881-sp3                                                                                                                 | K01192;K15923;K01191                                    |
| Genetic Information Processing | Non-homologous end-joining                    | 3 | 10 | 0.0889718 | 0.5801491 | ko03450 | bluegene-Led06361-sp3;yellowgene-Led02088-sp3;yellowgene-Led09267-sp3                                                                                                               | K10866;K10885;K10777                                    |
| Metabolism                     | Arginine biosynthesis                         | 4 | 16 | 0.0911211 | 0.5801491 | ko00220 | bluegene-Led00283-sp3;bluegene-Led09684-sp3;bluegene-Led06807-sp3;bluegene-Led08024-sp3                                                                                             | K01915;K01427;K15371;K01915                             |
| Metabolism                     | Tryptophan metabolism                         | 8 | 43 | 0.0940599 | 0.5801491 | ko00380 | bluegene-Led03563-sp3;bluegene-Led03564-sp3;bluegene-Led03809-sp3;bluegene-Led02084-sp3;bluegene-Led04488-sp3;bluegene-Led01537-sp3;yellowgene-Led05235-sp3;yellowgene-Led03617-sp3 | K00128;K00128;K00463;K01426;K01426;K00128;K07511;K14338 |
| Metabolism                     | Glycerophospholipid metabolism                | 8 | 44 | 0.1045589 | 0.5801491 | ko00564 | bluegene-Led09414-sp3;bluegene-Led08479-sp3;bluegene-Led06571-sp3;bluegene-Led11358-sp3;bluegene-Led10653-sp3;bluegene-Led03417-sp3;yellowgene-Led05060-sp3;yellowgene-Led08569-sp3 | K01613;K01613;K01115;K01613;K00968;K00993;K13621;K01613 |
| Metabolism                     | Sesquiterpenoid and triterpenoid biosynthesis | 1 | 1  | 0.1105187 | 0.5801491 | ko00909 | yellowgene-Led03000-sp3                                                                                                                                                             | K00801                                                  |

---

---

|            |                                    |   |    |           |           |         |                                                                                                                                                                                                       |                                                                |
|------------|------------------------------------|---|----|-----------|-----------|---------|-------------------------------------------------------------------------------------------------------------------------------------------------------------------------------------------------------|----------------------------------------------------------------|
| Metabolism | Pyruvate metabolism                | 9 | 54 | 0.1341332 | 0.5801491 | ko00620 | bluegene-Led03563-sp3;bluegene-Led04609-sp3;bluegene-Led09307-sp3;bluegene-Led03564-sp3;bluegene-Led07542-sp3;bluegene-Led09419-sp3;bluegene-Led01537-sp3;bluegene-Led06539-sp3;bluegene-Led01165-sp3 | K00128;K00101;K01679;K00128;K11262;K00102;K00128;K00029;K01649 |
| Metabolism | Fatty acid elongation              | 2 | 6  | 0.1353202 | 0.5801491 | ko00062 | bluegene-Led09268-sp3;yellowgene-Led05235-sp3                                                                                                                                                         | K07512;K07511                                                  |
| Metabolism | Thiamine metabolism                | 2 | 6  | 0.1353202 | 0.5801491 | ko00730 | bluegene-Led06378-sp3;yellowgene-Led01286-sp3                                                                                                                                                         | K03146;K00877                                                  |
| Metabolism | Fatty acid biosynthesis            | 3 | 12 | 0.1385869 | 0.5801491 | ko00061 | bluegene-Led07542-sp3;bluegene-Led09268-sp3;yellowgene-Led05281-sp3                                                                                                                                   | K11262;K07512;K00059                                           |
| Metabolism | Taurine and hypotaurine metabolism | 3 | 12 | 0.1385869 | 0.5801491 | ko00430 | bluegene-Led00741-sp3;bluegene-Led06807-sp3;yellowgene-Led06932-sp3                                                                                                                                   | K01580;K15371;K01580                                           |
| Metabolism | Starch and sucrose metabolism      | 8 | 47 | 0.1397566 | 0.5801491 | ko00500 | bluegene-Led05184-sp3;bluegene-Led01439-sp3;bluegene-Led00805-sp3;bluegene-Led06651-sp3;bluegene-Led07154-sp3;bluegene-Led09673-sp3;bluegene-Led01681-sp3;yellowgene-Led00508-sp3                     | K01178;K01187;K05349;K01178;K01176;K05349;K01176;K00706        |

---

|            |                                       |    |     |           |           |         |                                                                                                                                                                                                                                                                                                                                                                                                                                                                                                                                                                                                                                                                                                                                                                                                                                                                                                                                                                                                                                                                                     |                                                                                                                                                                                                                                                                                                                                   |
|------------|---------------------------------------|----|-----|-----------|-----------|---------|-------------------------------------------------------------------------------------------------------------------------------------------------------------------------------------------------------------------------------------------------------------------------------------------------------------------------------------------------------------------------------------------------------------------------------------------------------------------------------------------------------------------------------------------------------------------------------------------------------------------------------------------------------------------------------------------------------------------------------------------------------------------------------------------------------------------------------------------------------------------------------------------------------------------------------------------------------------------------------------------------------------------------------------------------------------------------------------|-----------------------------------------------------------------------------------------------------------------------------------------------------------------------------------------------------------------------------------------------------------------------------------------------------------------------------------|
| Metabolism | Biosynthesis of secondary metabolites | 46 | 359 | 0.1408129 | 0.5801491 | ko01110 | bluegene-Led03563-sp3;bluegene-Led09414-sp3;bluegene-Led01439-sp3;bluegene-Led08479-sp3;bluegene-Led00805-sp3;bluegene-Led00242-sp3;bluegene-Led06571-sp3;bluegene-Led05522-sp3;bluegene-Led02641-sp3;bluegene-Led10332-sp3;bluegene-Led11358-sp3;bluegene-Led09307-sp3;bluegene-Led00741-sp3;bluegene-Led03564-sp3;bluegene-Led07154-sp3;bluegene-Led09673-sp3;bluegene-Led07542-sp3;bluegene-Led07169-sp3;bluegene-Led09138-sp3;bluegene-Led04105-sp3;bluegene-Led03215-sp3;bluegene-Led02135-sp3;bluegene-Led07116-sp3;bluegene-Led01972-sp3;bluegene-Led01537-sp3;bluegene-Led03417-sp3;bluegene-Led00717-sp3;bluegene-Led05523-sp3;bluegene-Led01681-sp3;bluegene-Led01165-sp3;yellowgene-Led05170-sp3;yellowgene-Led11273-sp3;yellowgene-Led04360-sp3;yellowgene-Led08246-sp3;yellowgene-Led08569-sp3;yellowgene-Led02036-sp3;yellowgene-Led05235-sp3;yellowgene-Led06932-sp3;yellowgene-Led01633-sp3;yellowgene-Led05281-sp3;yellowgene-Led03000-sp3;yellowgene-Led10676-sp3;yellowgene-Led04339-sp3;yellowgene-Led05640-sp3;yellowgene-Led08594-sp3;yellowgene-Led10083-sp3 | K00128;K01613;K01187;K01613;K05349;K01694;K01115;K01687;K15634;K01785;K01613;K01679;K01580;K00128;K01176;K05349;K11262;K00928;K00147;K00953;K07748;K01736;K00817;K00318;K00128;K00993;K01657;K00211;K01176;K01649;K13501;K00766;K05917;K01497;K01613;K00766;K07511;K01580;K13830;K00059;K00801;K01626;K01739;K13501;K04486;K00222 |
|------------|---------------------------------------|----|-----|-----------|-----------|---------|-------------------------------------------------------------------------------------------------------------------------------------------------------------------------------------------------------------------------------------------------------------------------------------------------------------------------------------------------------------------------------------------------------------------------------------------------------------------------------------------------------------------------------------------------------------------------------------------------------------------------------------------------------------------------------------------------------------------------------------------------------------------------------------------------------------------------------------------------------------------------------------------------------------------------------------------------------------------------------------------------------------------------------------------------------------------------------------|-----------------------------------------------------------------------------------------------------------------------------------------------------------------------------------------------------------------------------------------------------------------------------------------------------------------------------------|



|                                      |                                             |   |    |           |           |         |                                                                                                                                         |                                           |
|--------------------------------------|---------------------------------------------|---|----|-----------|-----------|---------|-----------------------------------------------------------------------------------------------------------------------------------------|-------------------------------------------|
| Metabolism                           | Alanine, aspartate and glutamate metabolism | 5 | 27 | 0.1703684 | 0.6253595 | ko00250 | bluegene-Led00283-sp3;bluegene-Led00741-sp3;bluegene-Led06807-sp3;bluegene-Led08024-sp3;yellowgene-Led06932-sp3                         | K01915;K01580;K15371;K01915;K01580        |
| Environmental Information Processing | ABC transporters                            | 2 | 7  | 0.1761385 | 0.6253595 | ko02010 | bluegene-Led06953-sp3;yellowgene-Led06409-sp3                                                                                           | K15628;K05658                             |
| Metabolism                           | Aflatoxin biosynthesis                      | 1 | 2  | 0.2088706 | 0.6253595 | ko00254 | bluegene-Led07542-sp3                                                                                                                   | K11262                                    |
| Metabolism                           | Carbapenem biosynthesis                     | 1 | 2  | 0.2088706 | 0.6253595 | ko00332 | bluegene-Led09138-sp3                                                                                                                   | K00147                                    |
| Metabolism                           | Lysine degradation                          | 6 | 37 | 0.2184713 | 0.6253595 | ko00310 | bluegene-Led03563-sp3;bluegene-Led05131-sp3;bluegene-Led03564-sp3;bluegene-Led01537-sp3;yellowgene-Led08563-sp3;yellowgene-Led05235-sp3 | K00128;K00306;K00128;K00128;K11426;K07511 |
| Metabolism                           | Riboflavin metabolism                       | 2 | 8  | 0.2185251 | 0.6253595 | ko00740 | bluegene-Led04105-sp3;yellowgene-Led08246-sp3                                                                                           | K00953;K01497                             |
| Metabolism                           | Methane metabolism                          | 4 | 22 | 0.2195608 | 0.6253595 | ko00680 | bluegene-Led02641-sp3;bluegene-Led04605-sp3;bluegene-Led03479-sp3;bluegene-Led05570-sp3                                                 | K15634;K17066;K17066;K00122               |
| Cellular Processes                   | Autophagy other                             | - | 4  | 0.2195608 | 0.6253595 | ko04136 | bluegene-Led00777-sp3;bluegene-Led00427-sp3;bluegene-Led05503-sp3;yellowgene-Led09032-sp3                                               | K08341;K17906;K08334;K07203               |
| Metabolism                           | Ascorbate and aldarate metabolism           | 3 | 15 | 0.2254547 | 0.6253595 | ko00053 | bluegene-Led03563-sp3;bluegene-Led03564-sp3;bluegene-Led01537-sp3                                                                       | K00128;K00128;K00128                      |

|                    |                                                     |      |    |           |           |         |                                                                                                                                                                                                                                   |                                                                       |
|--------------------|-----------------------------------------------------|------|----|-----------|-----------|---------|-----------------------------------------------------------------------------------------------------------------------------------------------------------------------------------------------------------------------------------|-----------------------------------------------------------------------|
| Metabolism         | Folate biosynthesis                                 | 3    | 15 | 0.2254547 | 0.6253595 | ko00790 | bluegene-Led05615-sp3;bluegene-Led00681-sp3;yellowgene-Led08246-sp3                                                                                                                                                               | K06897;K01113;K01497                                                  |
| Metabolism         | Biosynthesis of various plant secondary metabolites | 3    | 15 | 0.2254547 | 0.6253595 | ko00999 | bluegene-Led00805-sp3;bluegene-Led09673-sp3;yellowgene-Led01633-sp3                                                                                                                                                               | K05349;K05349;K13830                                                  |
| Cellular Processes | Autophagy yeast                                     | - 10 | 70 | 0.2390583 | 0.6253595 | ko04138 | bluegene-Led01833-sp3;bluegene-Led07671-sp3;bluegene-Led00777-sp3;bluegene-Led00427-sp3;bluegene-Led00254-sp3;bluegene-Led02642-sp3;bluegene-Led05503-sp3;yellowgene-Led06737-sp3;yellowgene-Led09032-sp3;yellowgene-Led08814-sp3 | K12761;K19800;K08341;K17906;K18083;K20181;K08334;K20184;K07203;K08493 |
| Metabolism         | Fatty acid degradation                              | 5    | 31 | 0.2529572 | 0.6253595 | ko00071 | bluegene-Led03563-sp3;bluegene-Led03564-sp3;bluegene-Led01537-sp3;yellowgene-Led05235-sp3;yellowgene-Led03617-sp3                                                                                                                 | K00128;K00128;K00128;K07511;K14338                                    |
| Metabolism         | Phenylalanine metabolism                            | 3    | 16 | 0.2564547 | 0.6253595 | ko00360 | bluegene-Led02084-sp3;bluegene-Led04488-sp3;bluegene-Led07116-sp3                                                                                                                                                                 | K01426;K01426;K00817                                                  |
| Metabolism         | Nicotinate and nicotinamide metabolism              | 3    | 16 | 0.2564547 | 0.6253595 | ko00760 | bluegene-Led09363-sp3;yellowgene-Led01774-sp3;yellowgene-Led05781-sp3                                                                                                                                                             | K01950;K18551;K06210                                                  |
